# Supplementary material for: Synthesis of Benzofuro[3,2-b]indol-3-one Derivatives via Dearomative (3 + 2) Cycloaddition of 2-Nitrobenzofurans and para-Quinamines
Source: MDPI journal article supplement (doi:10.3390/molecules29051163), 2024-03-05

# Supporting Information

## Synthesis of Benzofuro[3,2-*b*]indol-3-one Derivatives via Dearomative (3 + 2) Cycloaddition of 2-Nitrobenzofurans and *para*-Quinamines

Wei-Cheng Yuan,<sup>1,2,\*</sup> Hai-Ying Zeng,<sup>1,2</sup> Yan-Ping Zhang,<sup>1</sup> Jian-Qiang Zhao,<sup>1</sup> Yong You,<sup>1</sup>  
Jun-Qing Yin,<sup>1</sup> Ming-Qiang Zhou<sup>2,\*</sup> and Zhen-Hua Wang<sup>1,\*</sup>

---

<sup>1</sup>Innovation Research Center of Chiral Drugs, Institute for Advanced Study, Chengdu University,  
Chengdu 610106, China

<sup>2</sup>China National Engineering Research Center of Chiral Drugs, Chengdu Institute of Organic  
Chemistry, Chinese Academy of Sciences, Chengdu 610041, China

yuanwc@cioc.ac.cn

screenfilm@foxmail.com

wangzhenhua@cdu.edu.cn

### Table of Contents

|                                                                                                                            |    |
|----------------------------------------------------------------------------------------------------------------------------|----|
| 1. Crystal data and structure refinement .....                                                                             | S1 |
| 2. Copies of <sup>1</sup> H, <sup>13</sup> C NMR spectra for compounds <b>3</b> , <b>4</b> , <b>5</b> , and <b>6</b> ..... | S3 |

## 1. Crystal data and structure refinement

Single crystals of compound **3ac** were prepared through dissolving the sample in mixture solvent of EtOH/DCM (1/1) at room temperature and crystalizing by slow evaporation of solvent. A suitable crystal was selected for structure determination on a 'Oxford Gemini E' diffractometer. The crystal was kept at 293 K during data collection. Using Olex2<sup>1</sup>, the structure was solved with the ShelXT<sup>2</sup> structure solution program using Intrinsic Phasing and refined with the ShelXL<sup>3</sup> refinement package using Least Squares minimization.

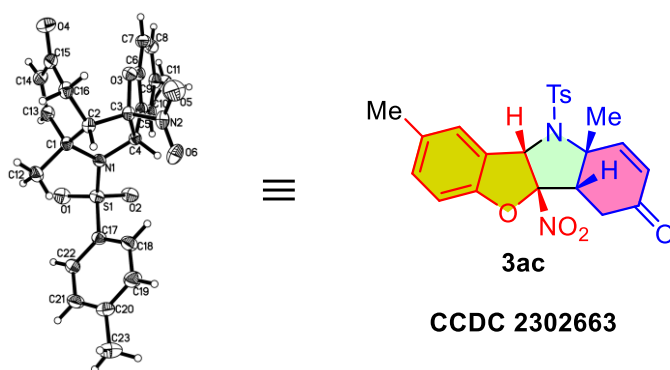

ORTEP of **3ac** (at the 50% probability level)

|                                      |                                                                 |
|--------------------------------------|-----------------------------------------------------------------|
| Identification code                  | <b>3ac</b>                                                      |
| Empirical formula                    | C <sub>23</sub> H <sub>22</sub> N <sub>2</sub> O <sub>6</sub> S |
| Formula weight                       | 454.48                                                          |
| Temperature/K                        | 293(2)                                                          |
| Crystal system                       | monoclinic                                                      |
| Space group                          | P2 <sub>1</sub> /c                                              |
| a/Å                                  | 12.1191(4)                                                      |
| b/Å                                  | 12.9353(5)                                                      |
| c/Å                                  | 14.2184(5)                                                      |
| α/°                                  | 90                                                              |
| β/°                                  | 91.613(3)                                                       |
| γ/°                                  | 90                                                              |
| Volume/Å <sup>3</sup>                | 2228.06(13)                                                     |
| Z                                    | 4                                                               |
| ρ <sub>calc</sub> /g/cm <sup>3</sup> | 1.355                                                           |
| μ/mm <sup>-1</sup>                   | 1.656                                                           |
| F(000)                               | 952.0                                                           |
| Crystal size/mm <sup>3</sup>         | 0.14 × 0.12 × 0.08                                              |
| Radiation                            | CuKα (λ = 1.54184)                                              |
| 2θ range for data collection/°       | 7.298 to 134.142                                                |
| Index ranges                         | -14 ≤ h ≤ 14, -15 ≤ k ≤ 15, -16 ≤ l ≤ 16                        |

|                                                |                                                                  |
|------------------------------------------------|------------------------------------------------------------------|
| Reflections collected                          | 20024                                                            |
| Independent reflections                        | 3979 [ $R_{\text{int}} = 0.0558$ , $R_{\text{sigma}} = 0.0363$ ] |
| Data/restraints/parameters                     | 3979/0/292                                                       |
| Goodness-of-fit on $F^2$                       | 1.041                                                            |
| Final R indexes [ $I \geq 2\sigma(I)$ ]        | $R_1 = 0.0435$ , $wR_2 = 0.1165$                                 |
| Final R indexes [all data]                     | $R_1 = 0.0538$ , $wR_2 = 0.1277$                                 |
| Largest diff. peak/hole / $e \text{ \AA}^{-3}$ | 0.26/-0.27                                                       |

1. Dolomanov, O. V.; Bourhis, L. J.; Gildea, R. J.; Howard, J. A. K.; Puschmann, H. *J. Appl. Cryst.*, **2009**, *42*, 339-341.
2. Sheldrick, G. M. *Acta Cryst.* **2015**, *A71*, 3-8.
3. Sheldrick, G. M. *Acta Cryst.* **2015**, *C71*, 3-8.

## 2. Copies of $^1\text{H}$ , $^{13}\text{C}$ NMR spectra for compounds 3, 4, 5, and 6

### $^1\text{H}$ NMR (400 MHz, $\text{DMSO}-d_6$ ) of 3aa

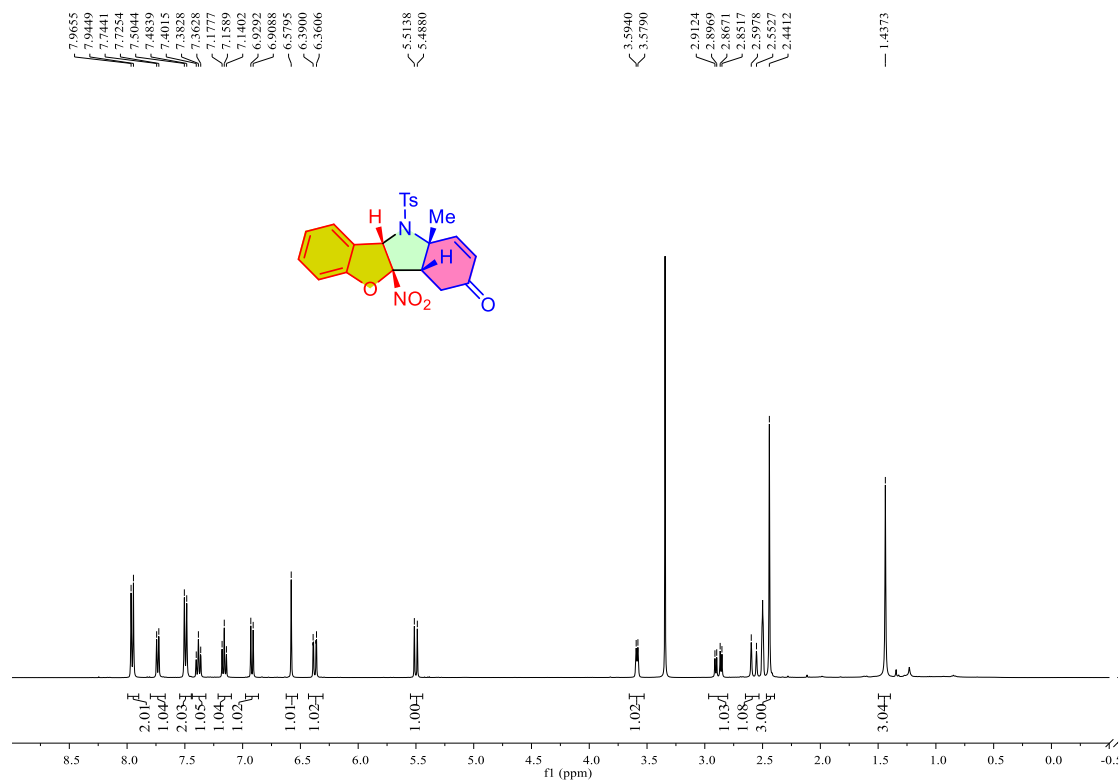

### $^{13}\text{C}$ NMR (101 MHz, $\text{DMSO}-d_6$ ) of 3aa

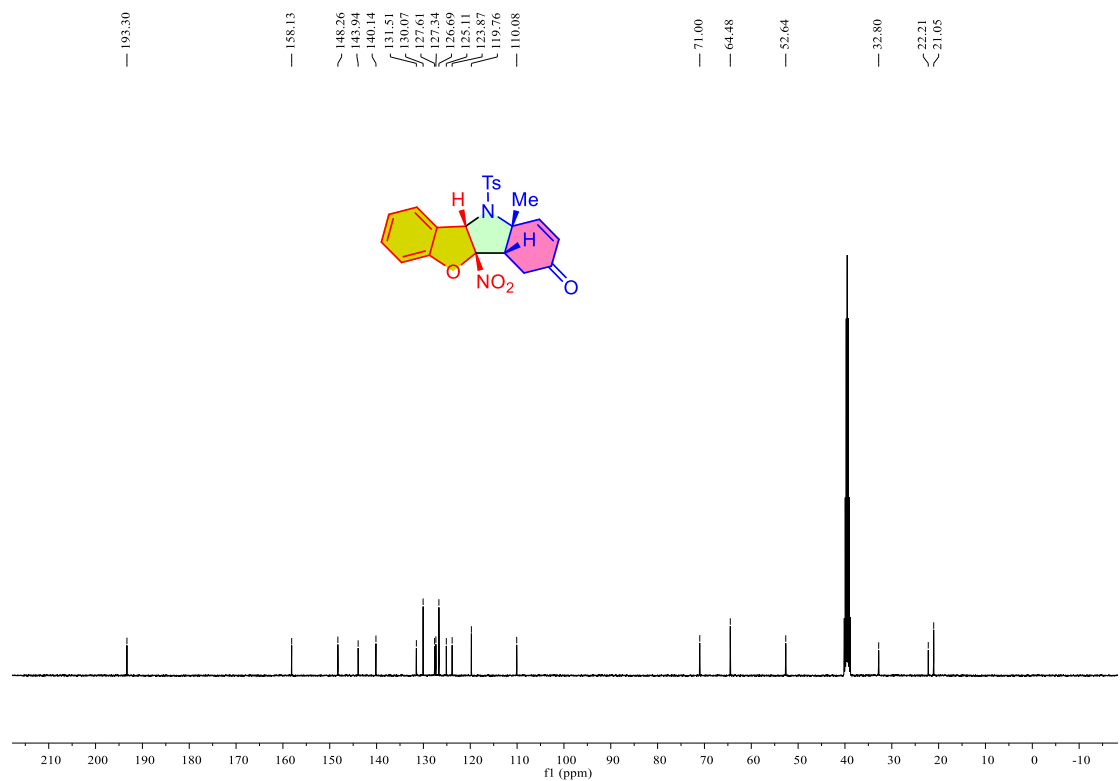



<sup>1</sup>H NMR (400 MHz, CDCl<sub>3</sub>) of **3ba**

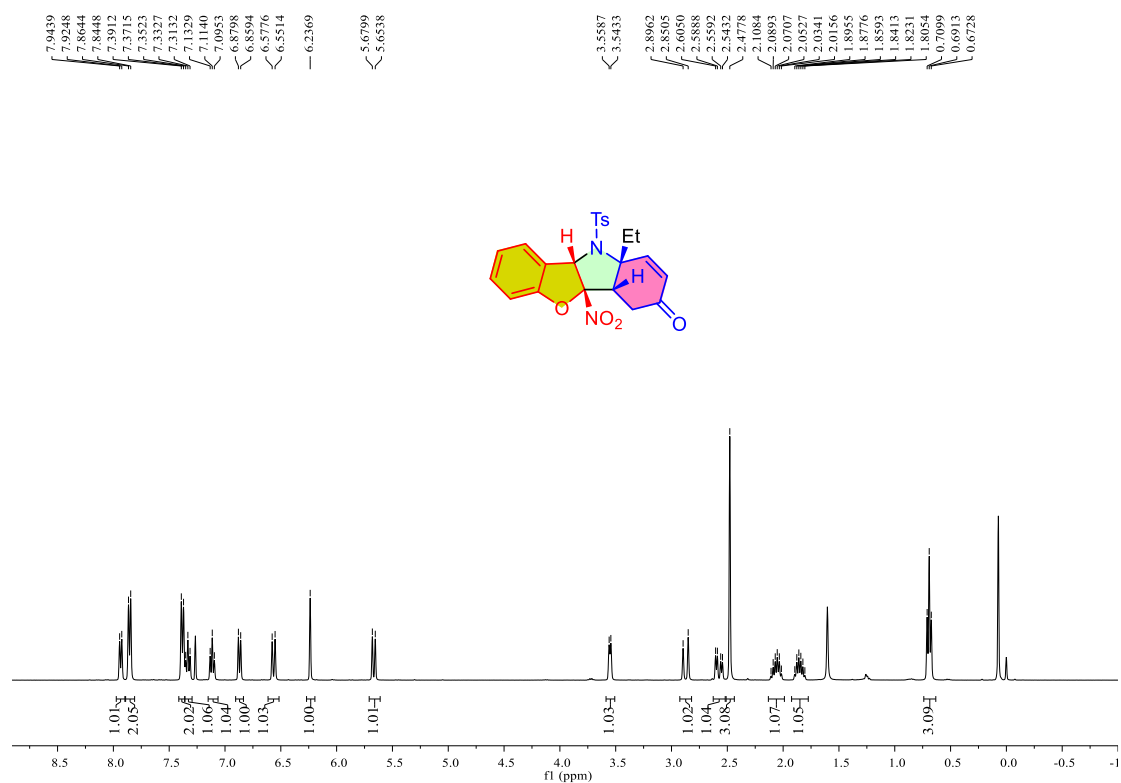

<sup>13</sup>C{<sup>1</sup>H} NMR (101 MHz, CDCl<sub>3</sub>) of **3ba**

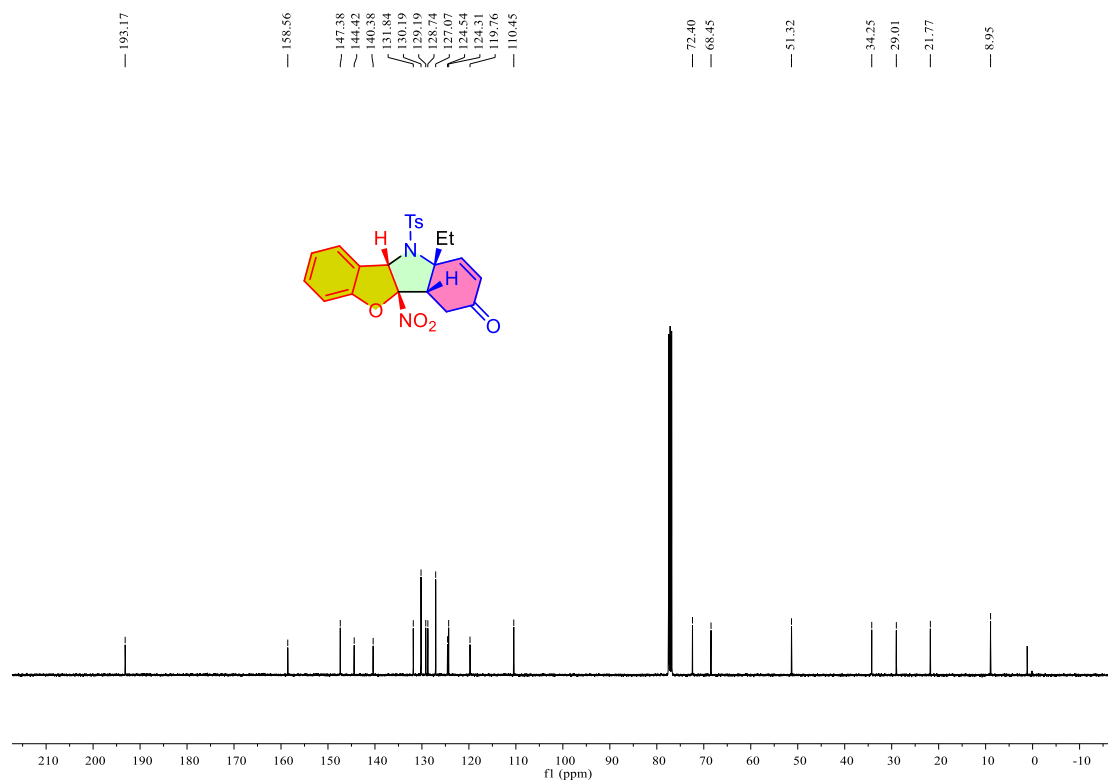

$^1\text{H}$  NMR (400 MHz,  $\text{CDCl}_3$ ) of **3ca**

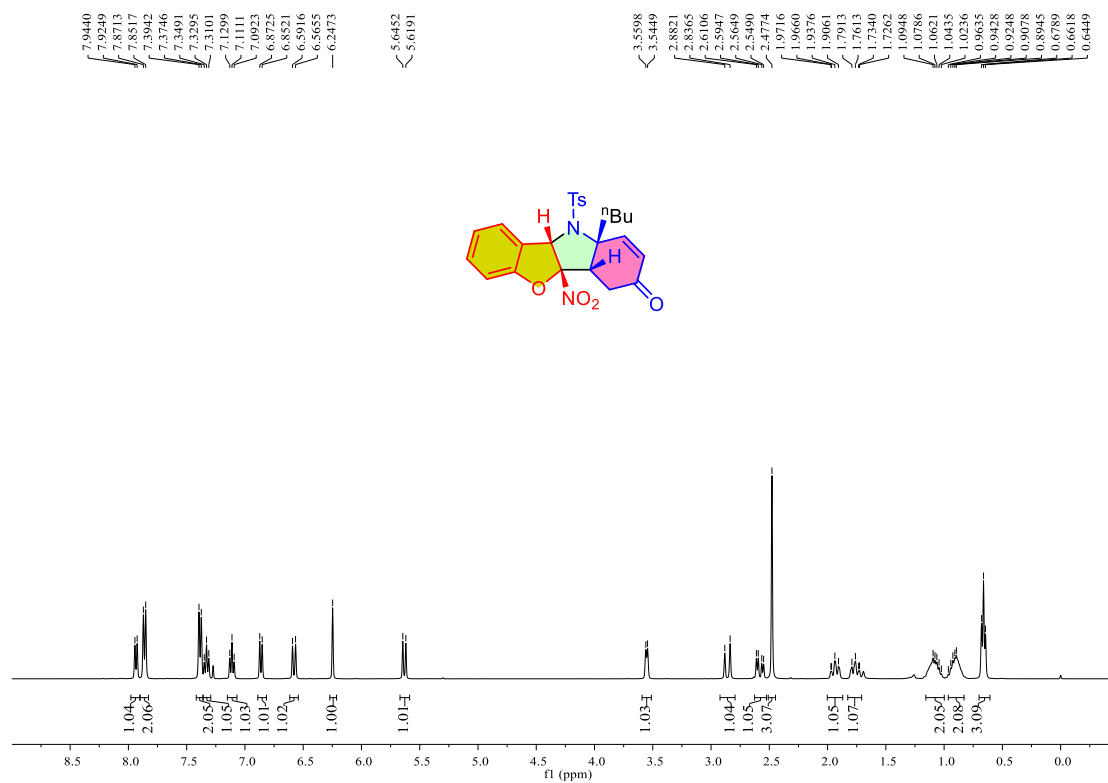

$^{13}\text{C}\{^1\text{H}\}$  NMR (101 MHz,  $\text{CDCl}_3$ ) of **3ca**

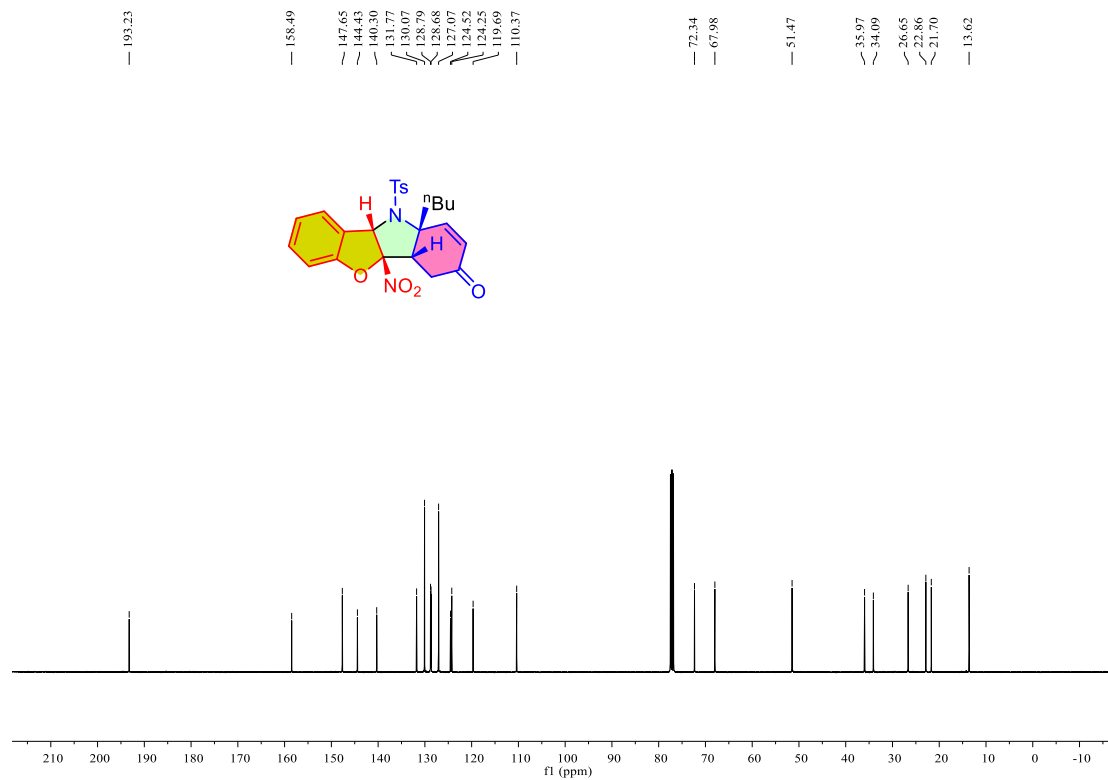

<sup>1</sup>H NMR (400 MHz, CDCl<sub>3</sub>) of **3da**

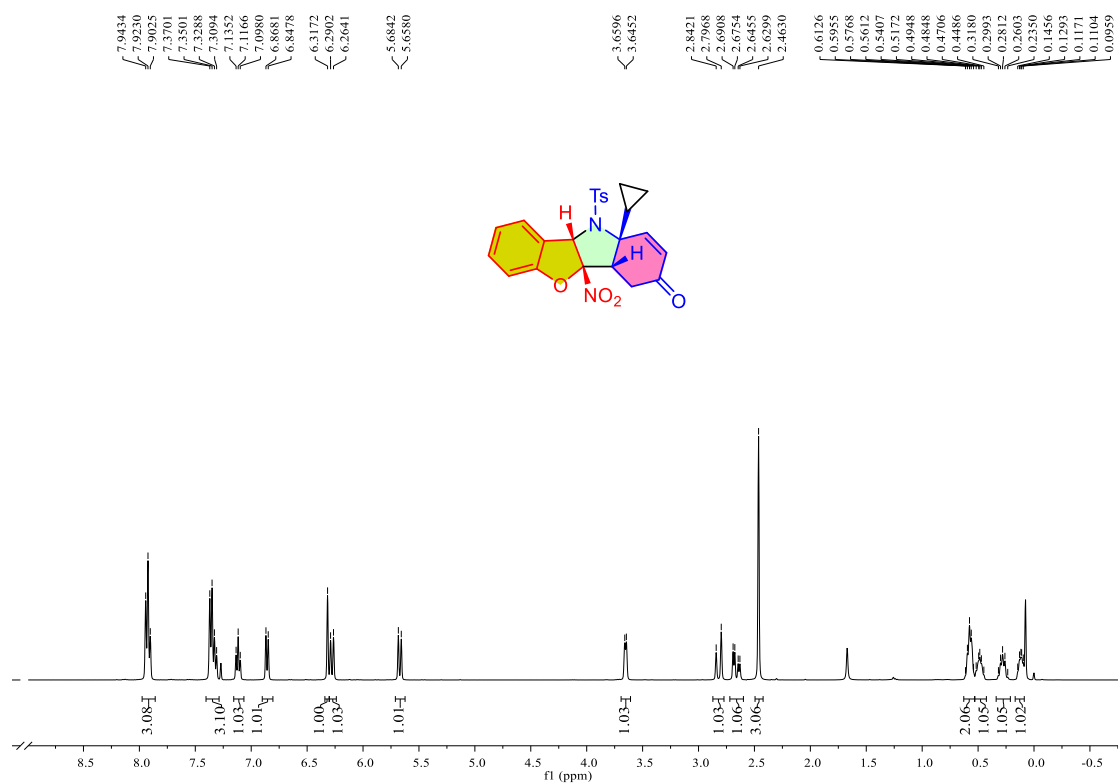

<sup>13</sup>C{<sup>1</sup>H} NMR (101 MHz, CDCl<sub>3</sub>) of **3da**

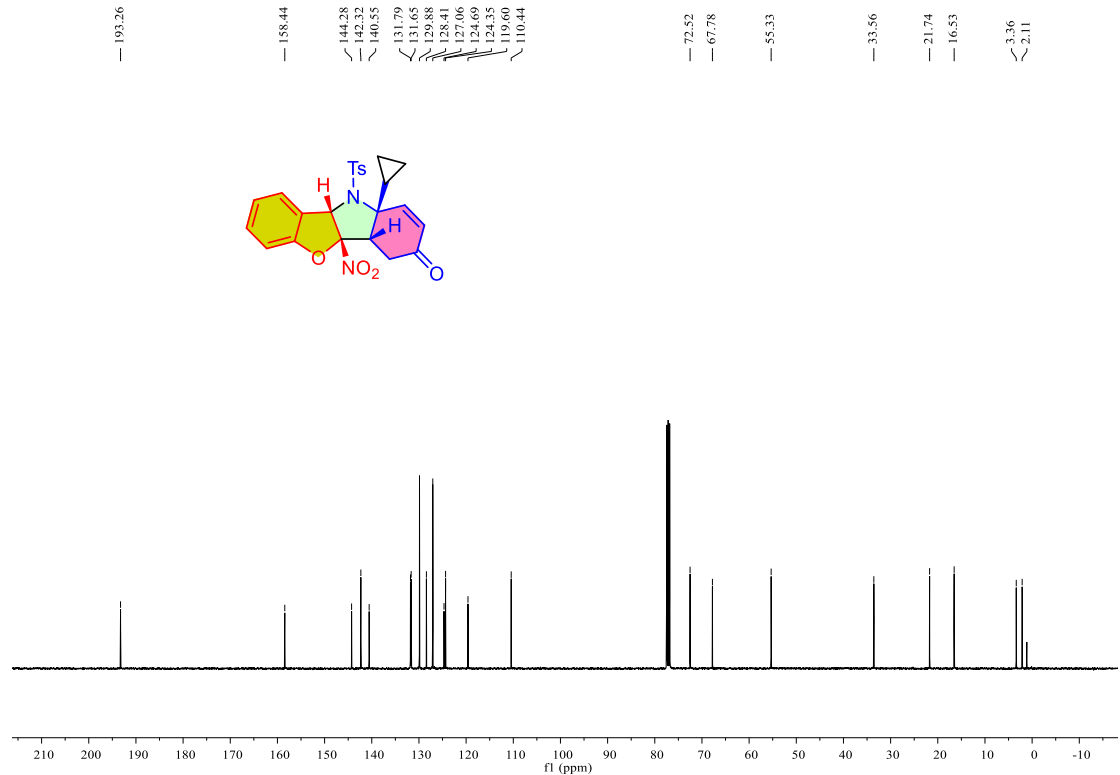

<sup>1</sup>H NMR (400 MHz, CDCl<sub>3</sub>) of **3ea**

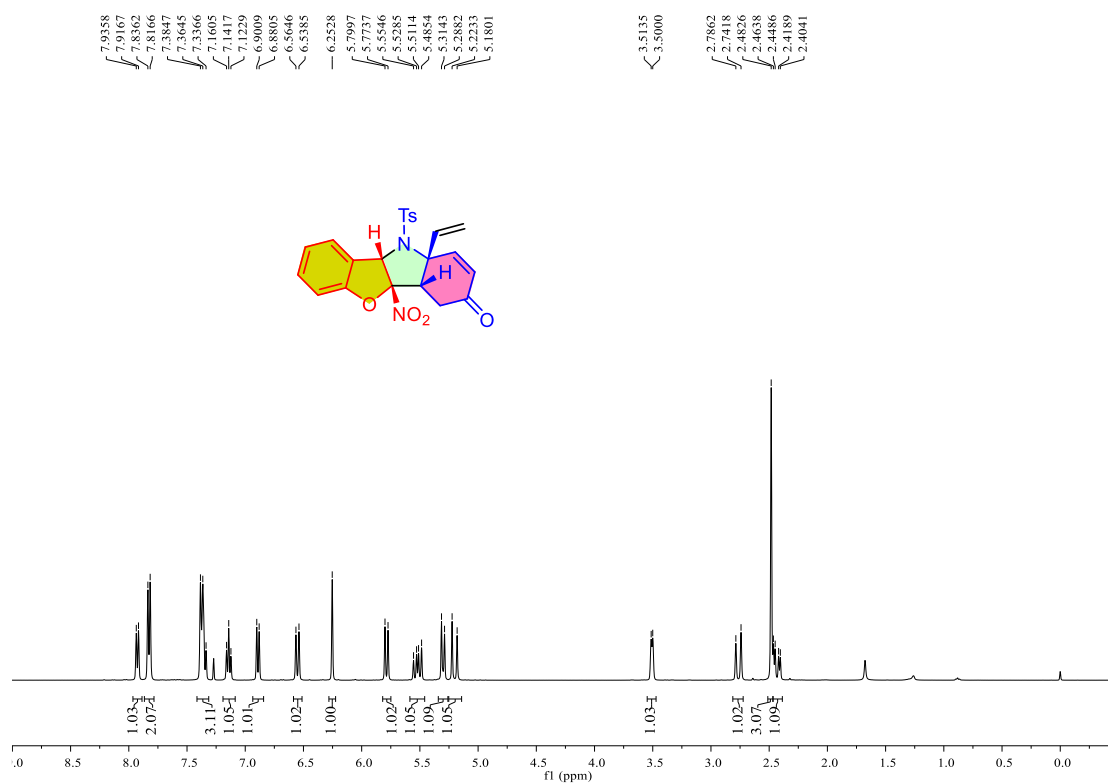

<sup>13</sup>C{<sup>1</sup>H} NMR (101 MHz, CDCl<sub>3</sub>) of **3ea**

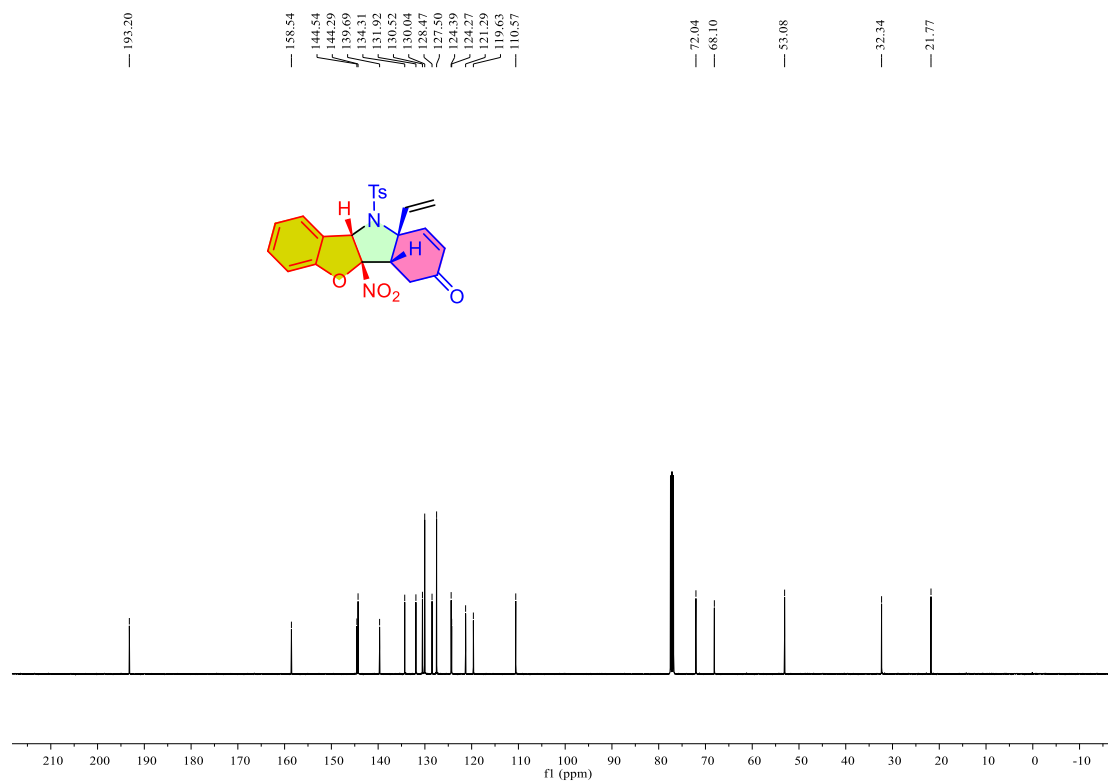

<sup>1</sup>H NMR (400 MHz, CDCl<sub>3</sub>) of **3fa**

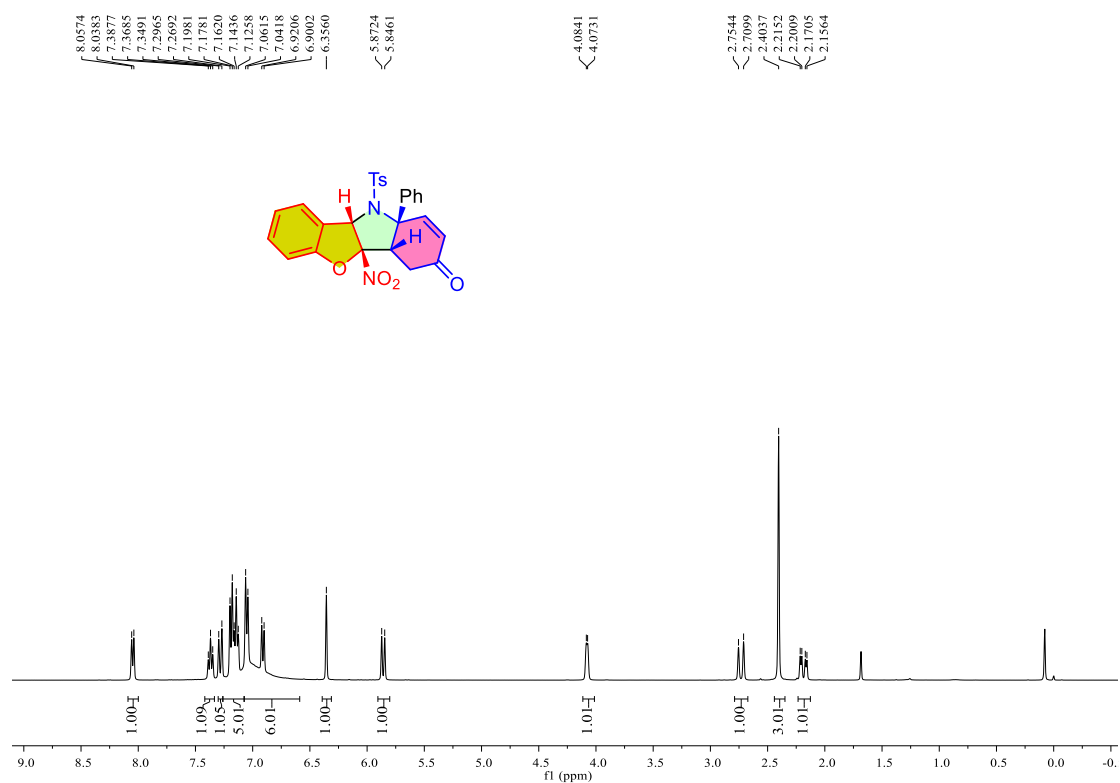

<sup>13</sup>C{<sup>1</sup>H} NMR (101 MHz, CDCl<sub>3</sub>) of **3fa**

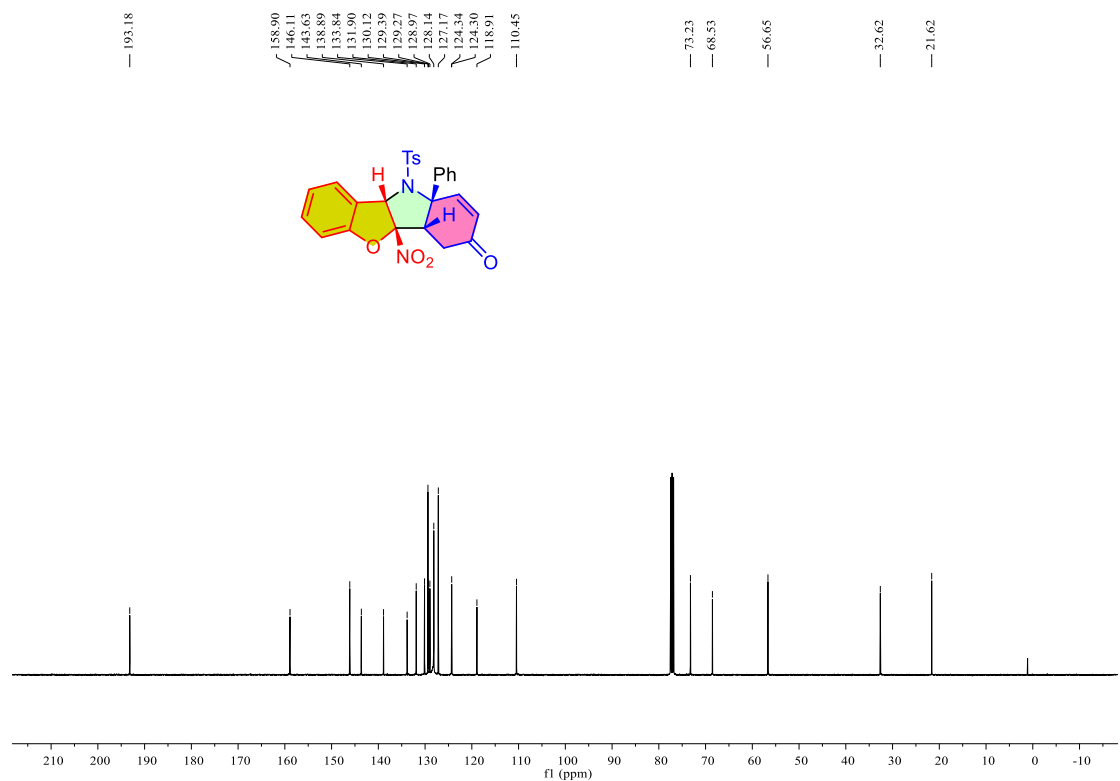

<sup>1</sup>H NMR (400 MHz, CDCl<sub>3</sub>) of **3ga**

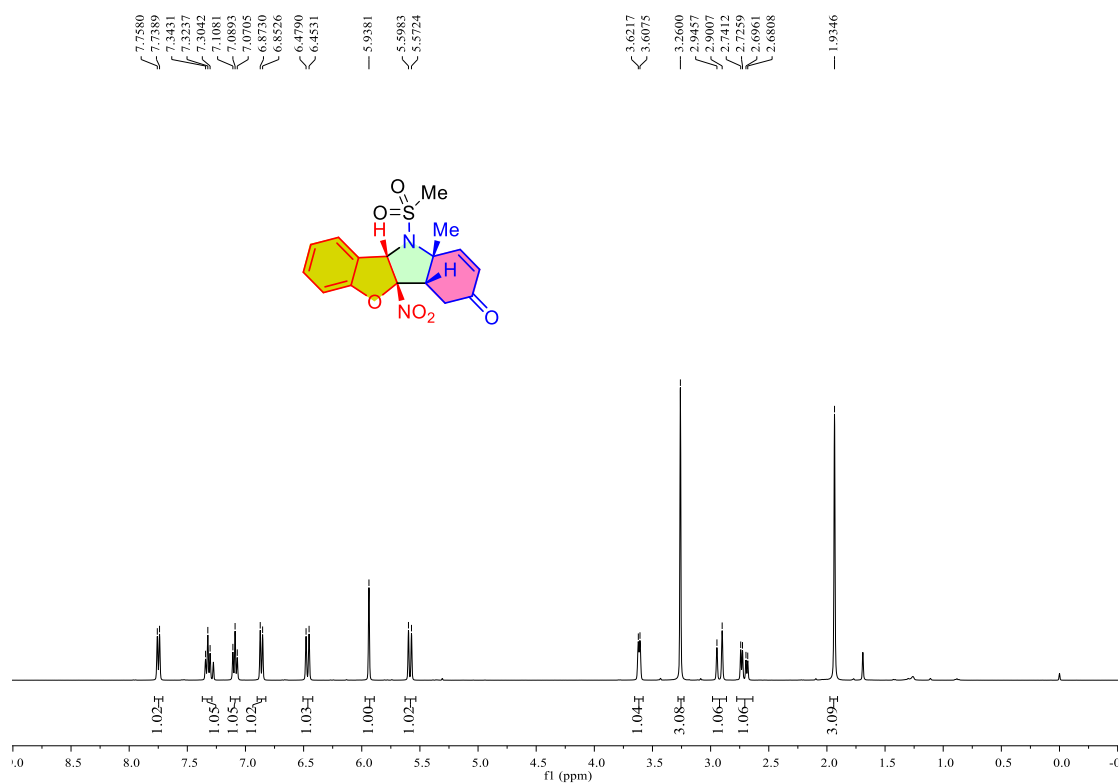

<sup>13</sup>C{<sup>1</sup>H} NMR (101 MHz, CDCl<sub>3</sub>) of **3ga**

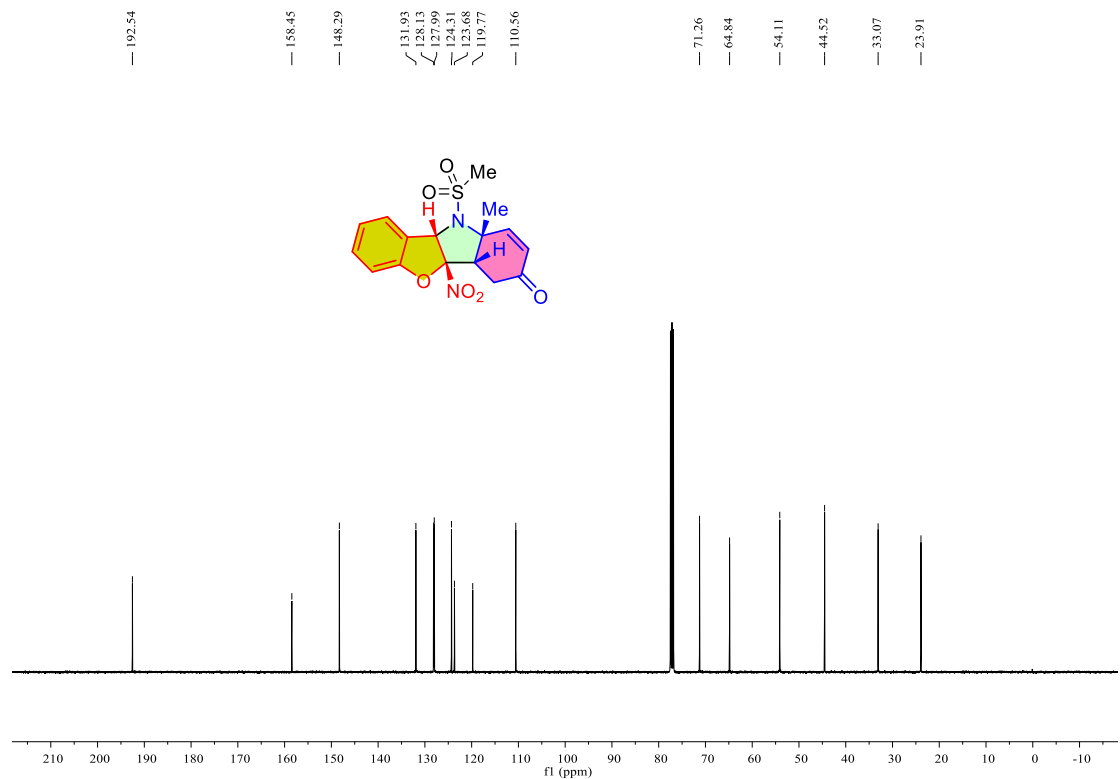

<sup>1</sup>H NMR (400 MHz, CDCl<sub>3</sub>) of **3ha**

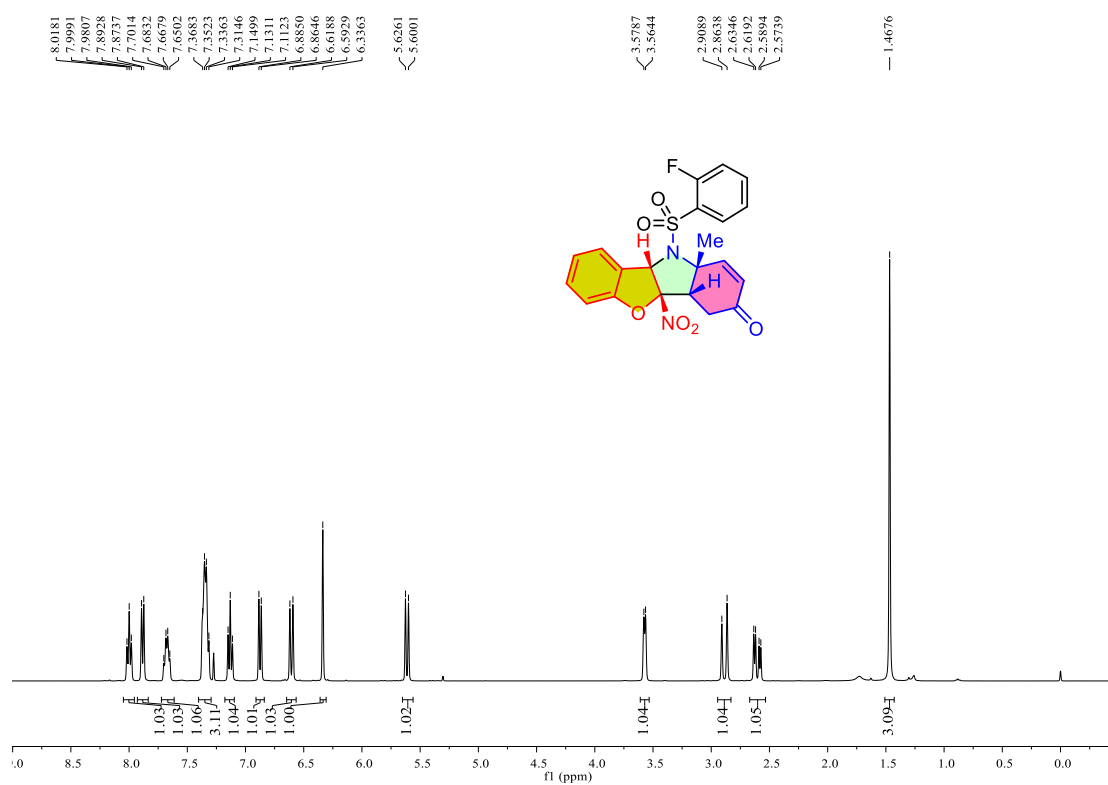

<sup>13</sup>C {<sup>1</sup>H} NMR (101 MHz, CDCl<sub>3</sub>) of **3ha**

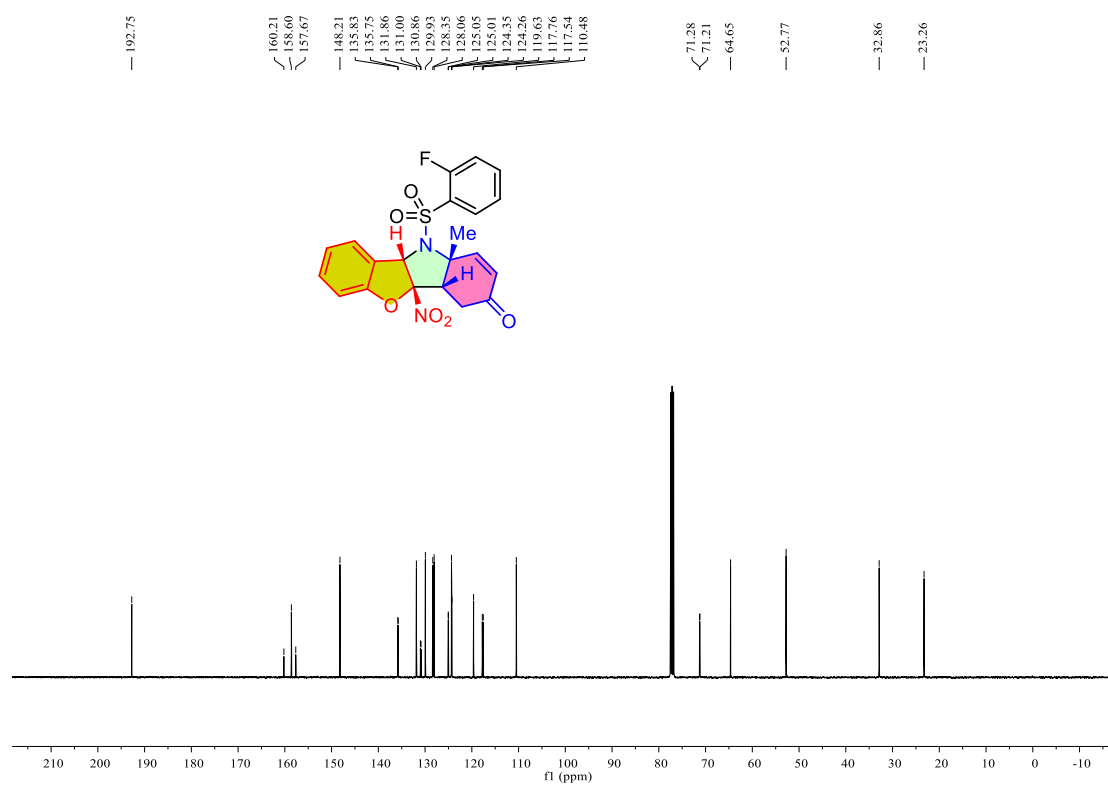

<sup>1</sup>H NMR (400 MHz, CDCl<sub>3</sub>) of **3ia**

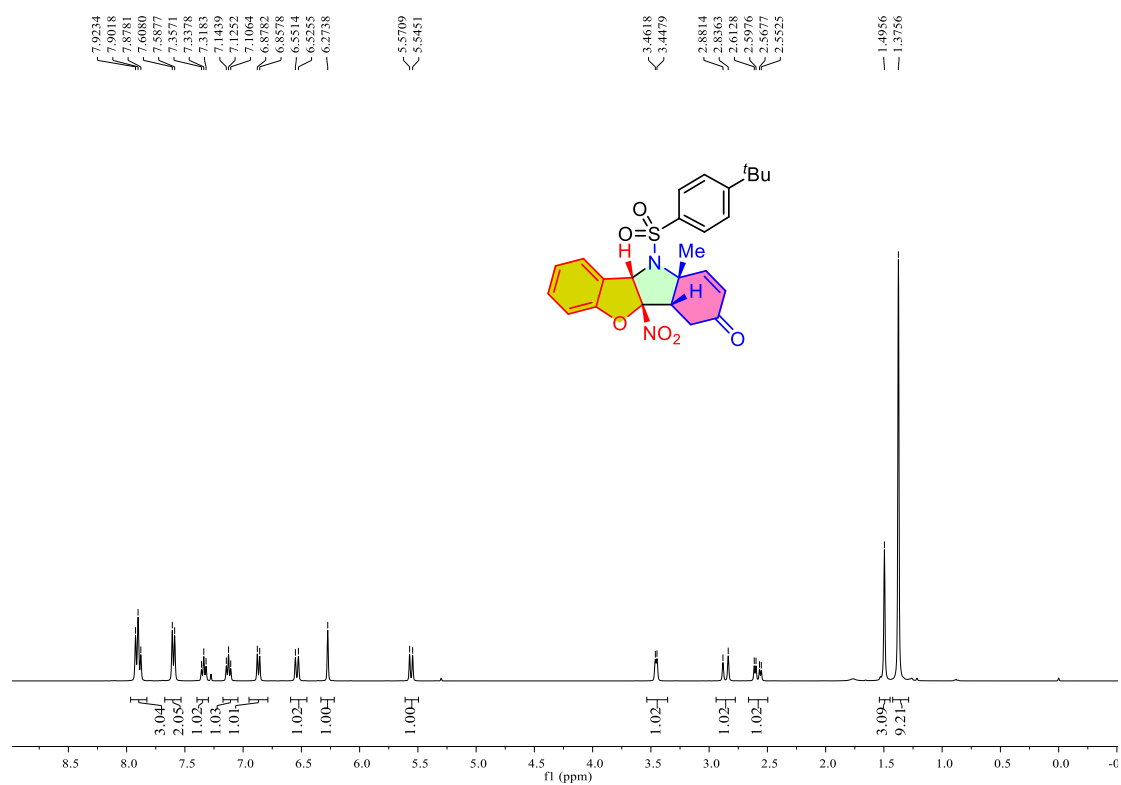

<sup>13</sup>C{<sup>1</sup>H} NMR (101 MHz, CDCl<sub>3</sub>) of **3ia**

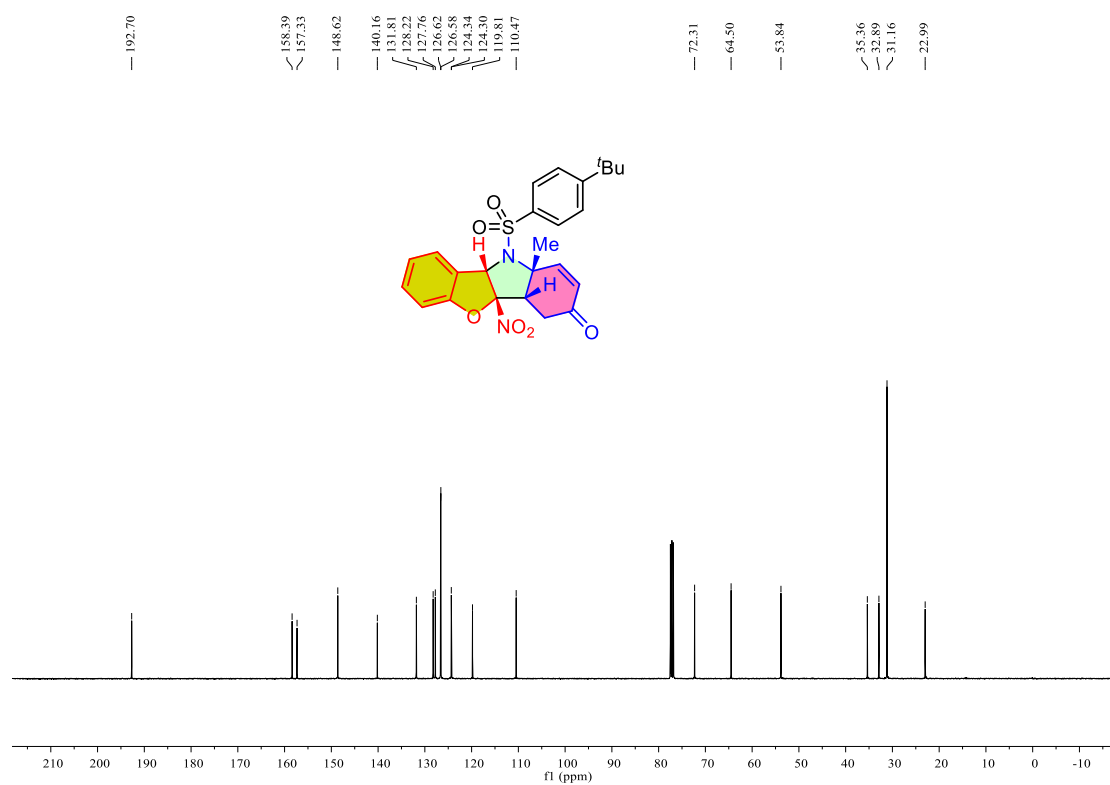



<sup>1</sup>H NMR (400 MHz, CDCl<sub>3</sub>) of **3ja**

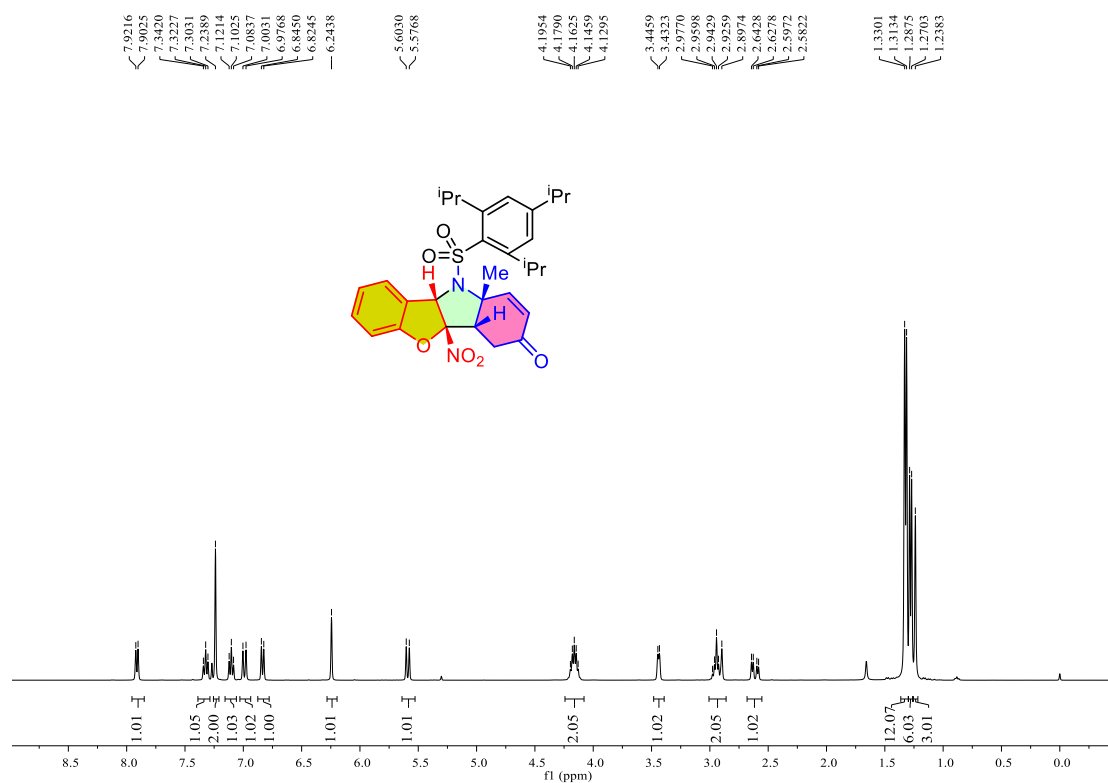

<sup>13</sup>C{<sup>1</sup>H} NMR (101 MHz, CDCl<sub>3</sub>) of **3ja**

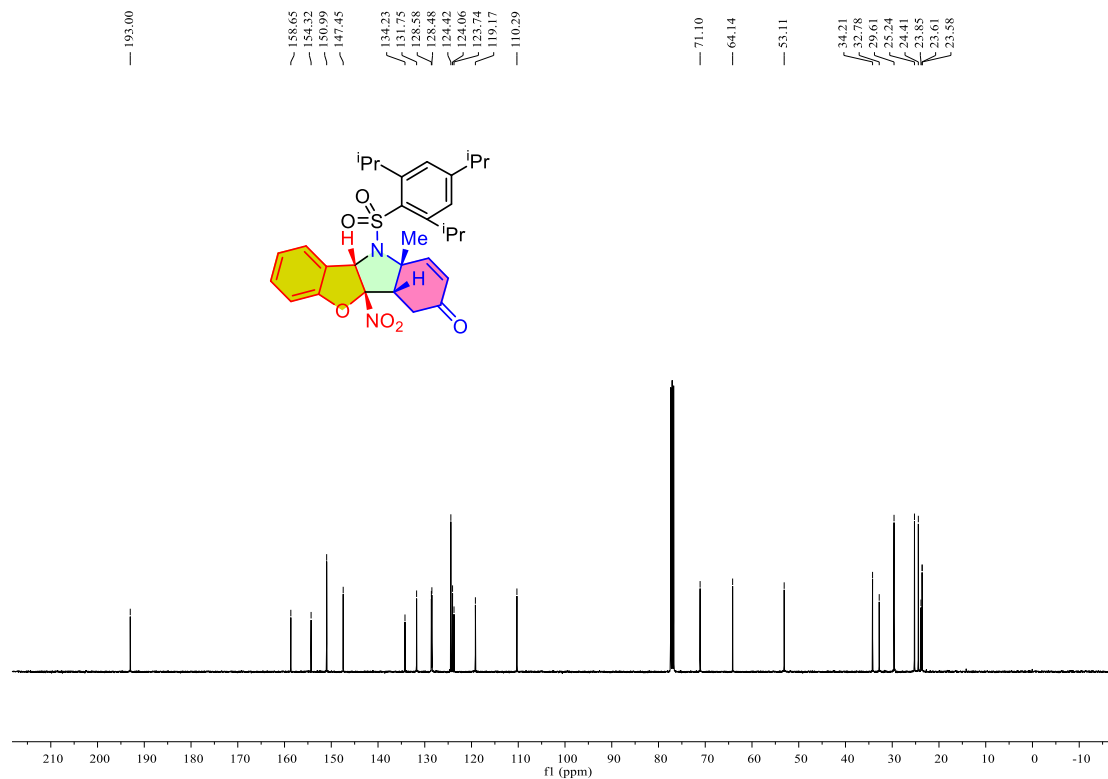

<sup>1</sup>H NMR (400 MHz, CDCl<sub>3</sub>) of **3ka**

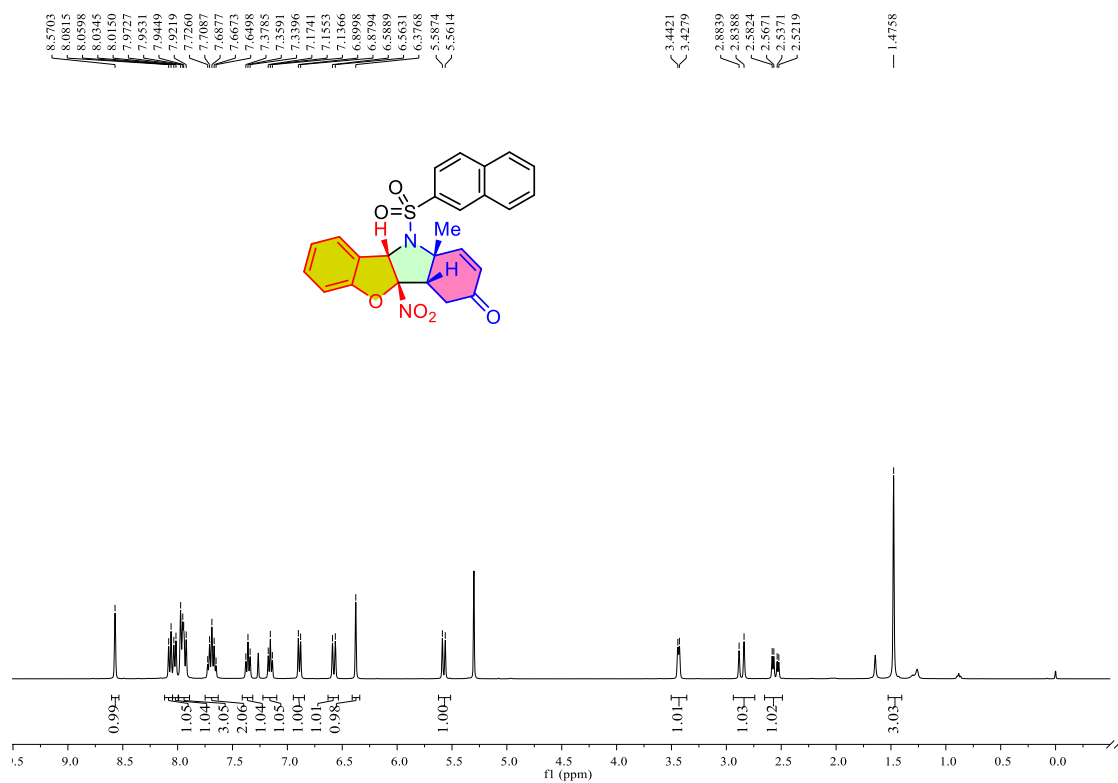

<sup>13</sup>C {<sup>1</sup>H} NMR (101 MHz, CDCl<sub>3</sub>) of **3ka**

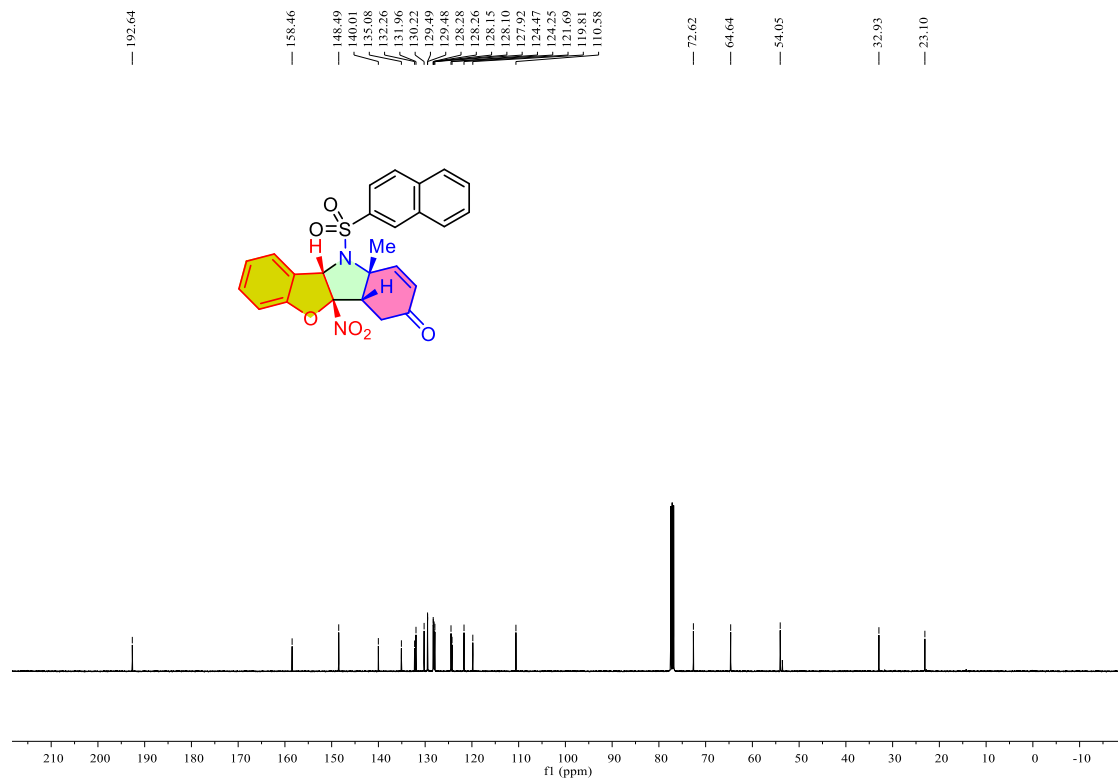

Chemical structure of compound 10: CC1=C(C(=O)N1C2=CC=CC=C2C3=CC=CC=C3O3)C(=O)N1C2=CC=CC=C2C3=CC=CC=C3O3

<sup>1</sup>H NMR spectrum (CDCl<sub>3</sub>) of compound 10. The x-axis represents the chemical shift in ppm, ranging from 0.0 to 8.5. The spectrum shows several multiplets and singlets. Integration values are provided below the baseline.

| Chemical Shift (ppm)                                                                                                                   | Integration                                    |
|----------------------------------------------------------------------------------------------------------------------------------------|------------------------------------------------|
| 7.8428, 7.8237, 7.7680, 7.7615, 7.7067, 7.6945, 7.6855, 7.5489, 7.5388, 7.1610, 7.1497, 7.1279, 7.1090, 6.8887, 6.8682, 6.4615, 6.4356 | 1.02, 1.02, 1.00, 1.04, 2.07, 1.02, 1.04, 1.00 |
| 5.5963, 5.5704                                                                                                                         | 1.03                                           |
| 3.5167, 3.5024                                                                                                                         | 1.03                                           |
| 2.8910, 2.8458, 2.6558, 2.6403, 2.6105, 2.5951                                                                                         | 1.05                                           |
| 1.7112                                                                                                                                 | 3.02                                           |

Chemical structure of the compound is shown above the spectrum. The structure is a complex molecule featuring a benzene ring, a furan ring, a pyridine ring, and a thienothiopyran ring system. The structure is color-coded: the benzene ring is yellow, the furan ring is orange, the pyridine ring is green, and the thienothiopyran ring is blue. The structure is labeled with  $\text{H}$ ,  $\text{Me}$ ,  $\text{NO}_2$ , and  $\text{S}$ .

Chemical shift values (ppm) are listed above the spectrum:

- 192.55
- 158.41
- 148.26
- 143.58
- 132.81
- 132.66
- 131.96
- 128.11
- 127.77
- 127.59
- 124.35
- 123.86
- 119.75
- 110.58
- 71.59
- 65.33
- 53.40
- 32.90
- 22.73

<sup>1</sup>H NMR (400 MHz, DMSO-*d*<sub>6</sub>) of **3ab**

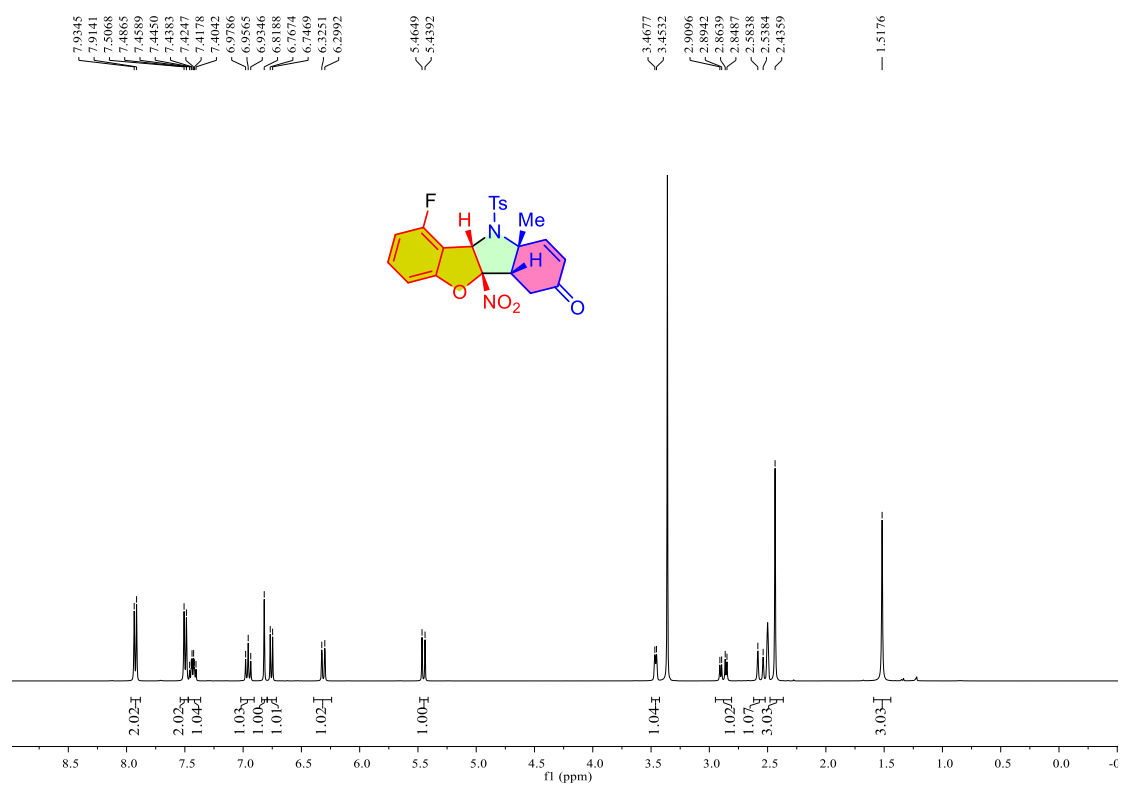

<sup>13</sup>C{<sup>1</sup>H} NMR (101 MHz, DMSO-*d*<sub>6</sub>) of **3ab**

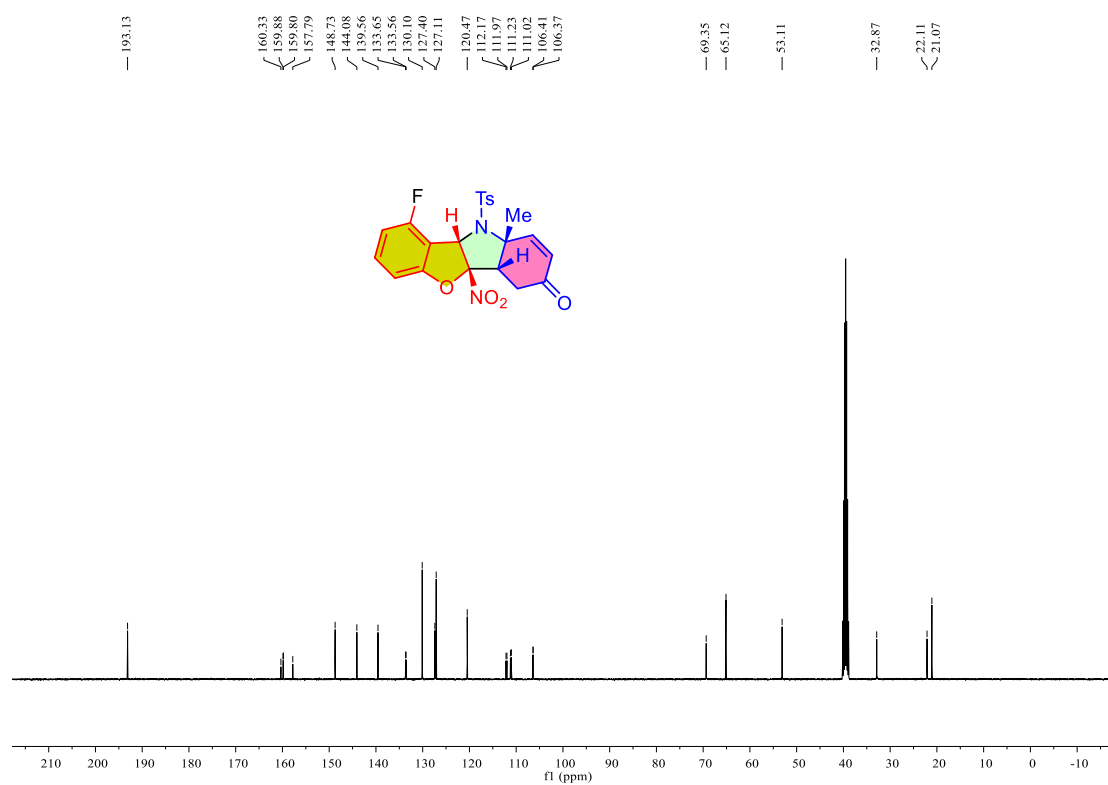

<sup>1</sup>H NMR (400 MHz, CDCl<sub>3</sub>) of **3ac**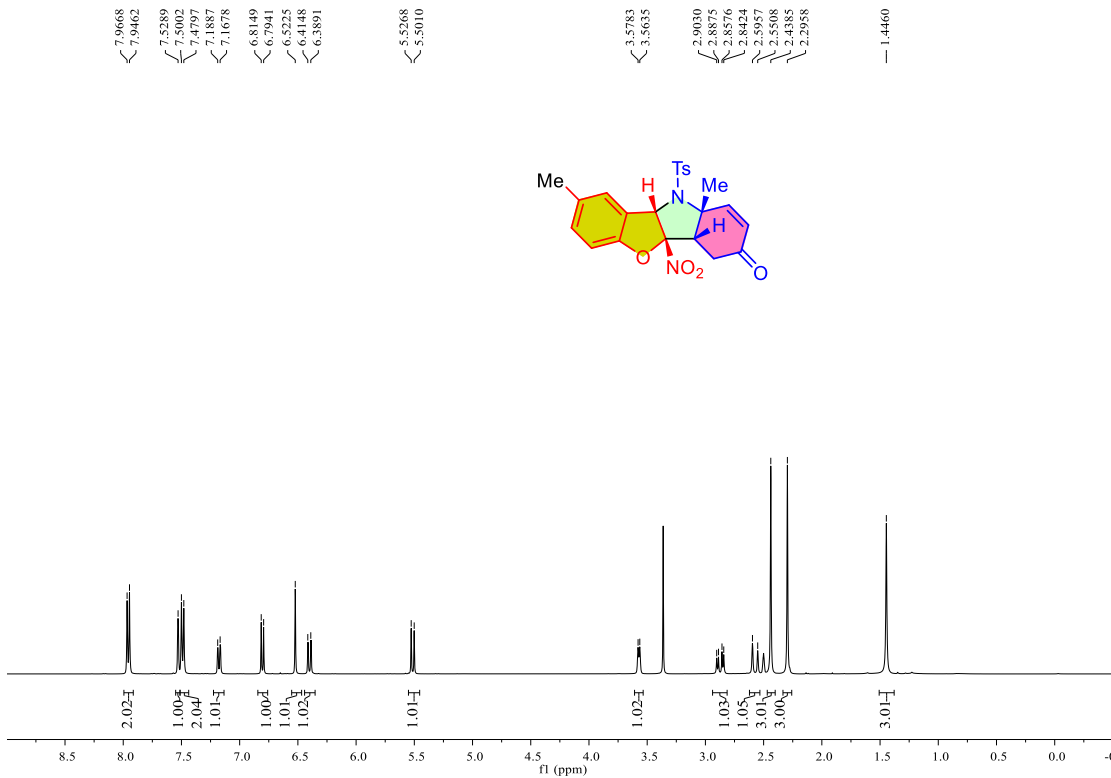 $^{13}\text{C}\{^1\text{H}\}$  NMR (101 MHz,  $\text{CDCl}_3$ ) of **3ac**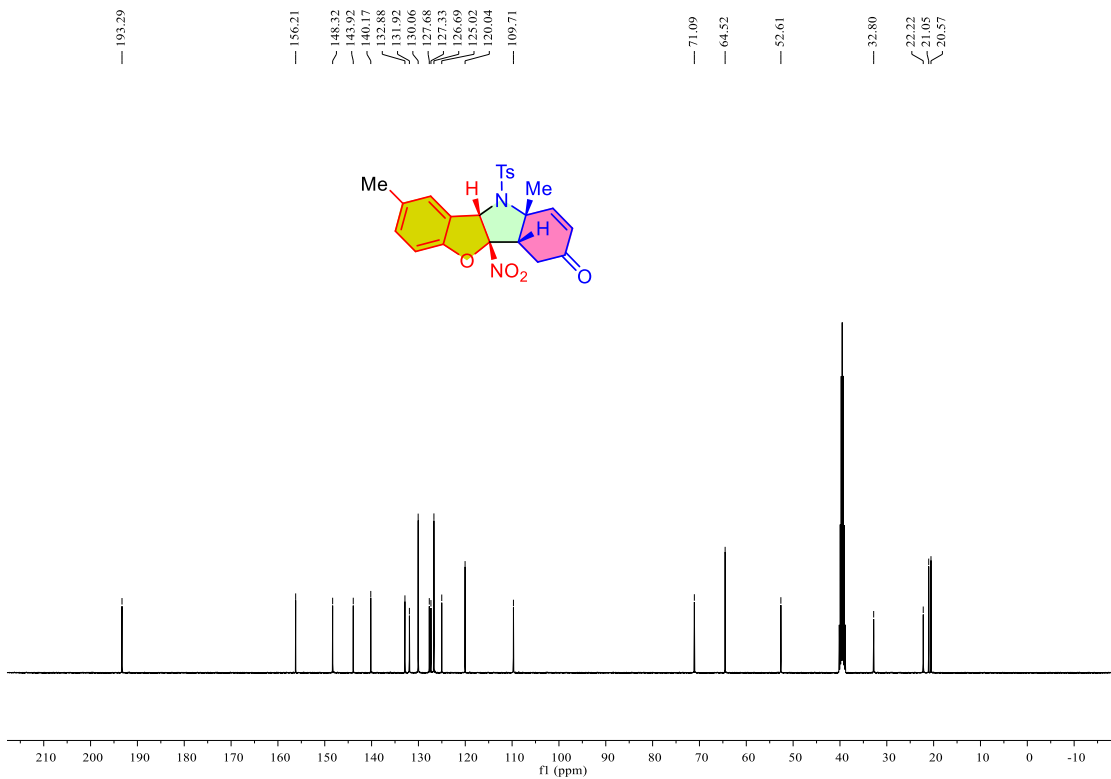

<sup>1</sup>H NMR (400 MHz, CDCl<sub>3</sub>) of **3ad**

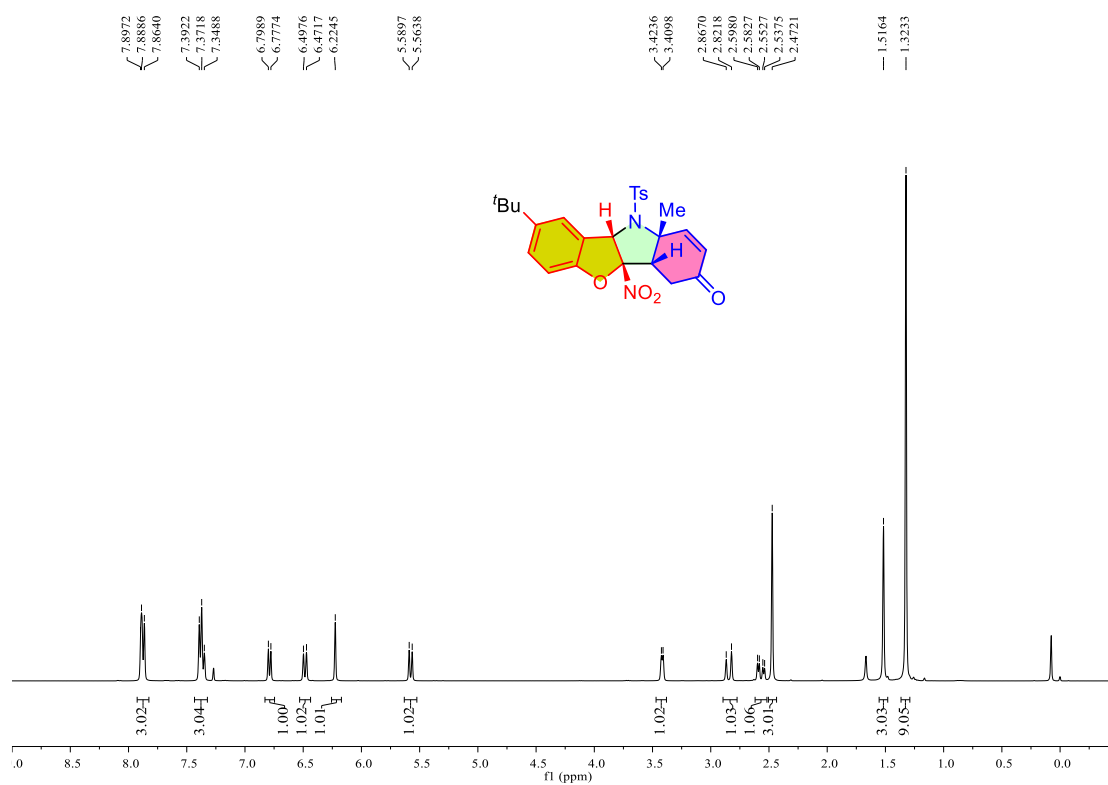

<sup>13</sup>C {<sup>1</sup>H} NMR (101 MHz, CDCl<sub>3</sub>) of **3ad**

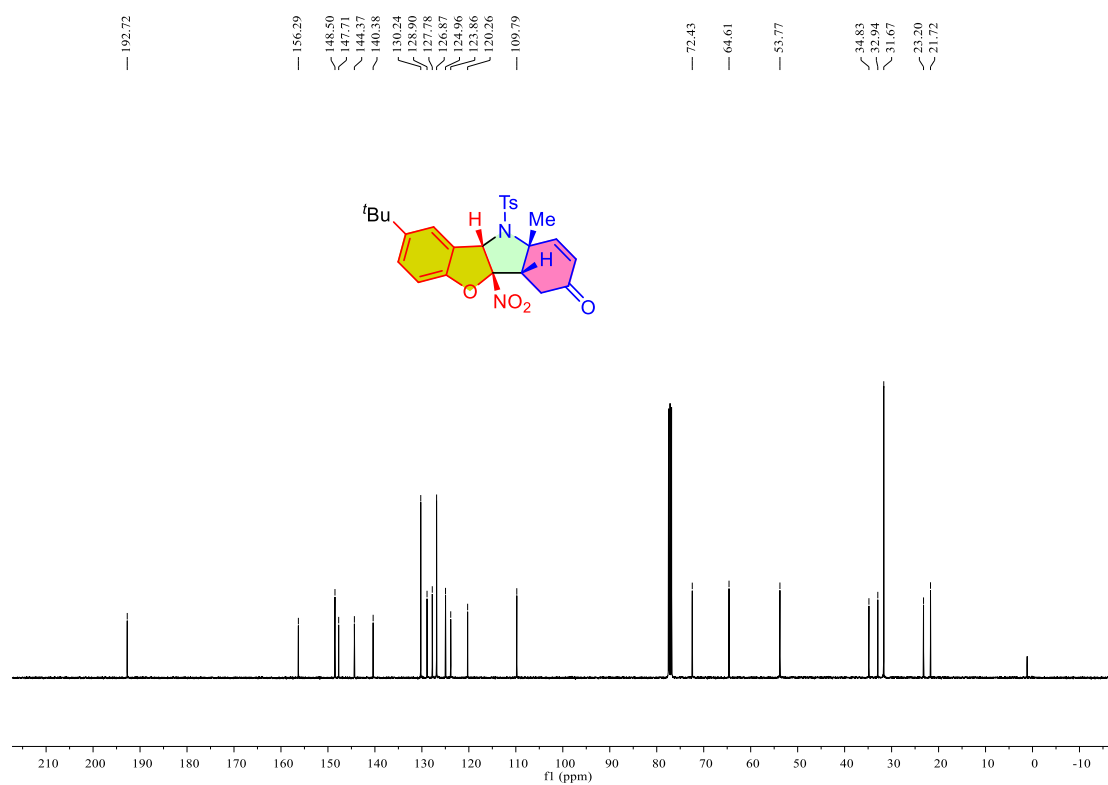

<sup>1</sup>H NMR (400 MHz, CDCl<sub>3</sub>) of **3ae**

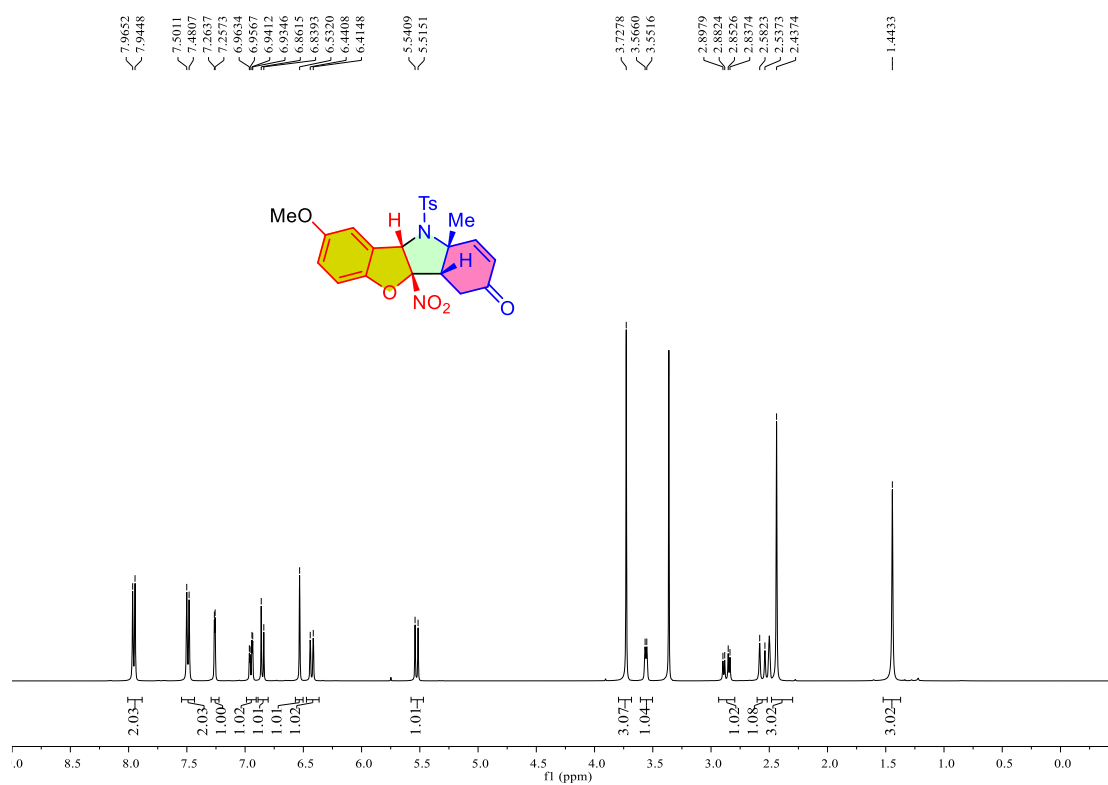

<sup>13</sup>C{<sup>1</sup>H} NMR (101 MHz, CDCl<sub>3</sub>) of **3ae**

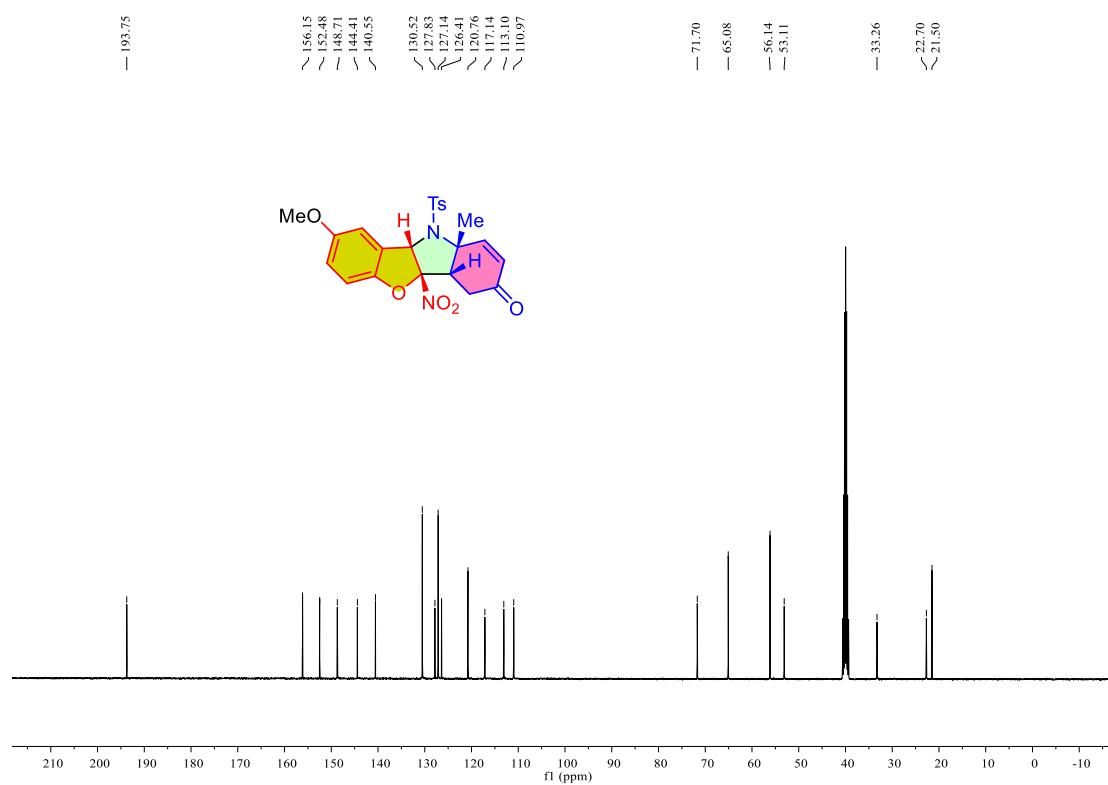

<sup>1</sup>H NMR (400 MHz, DMSO-*d*<sub>6</sub>) of **3af**

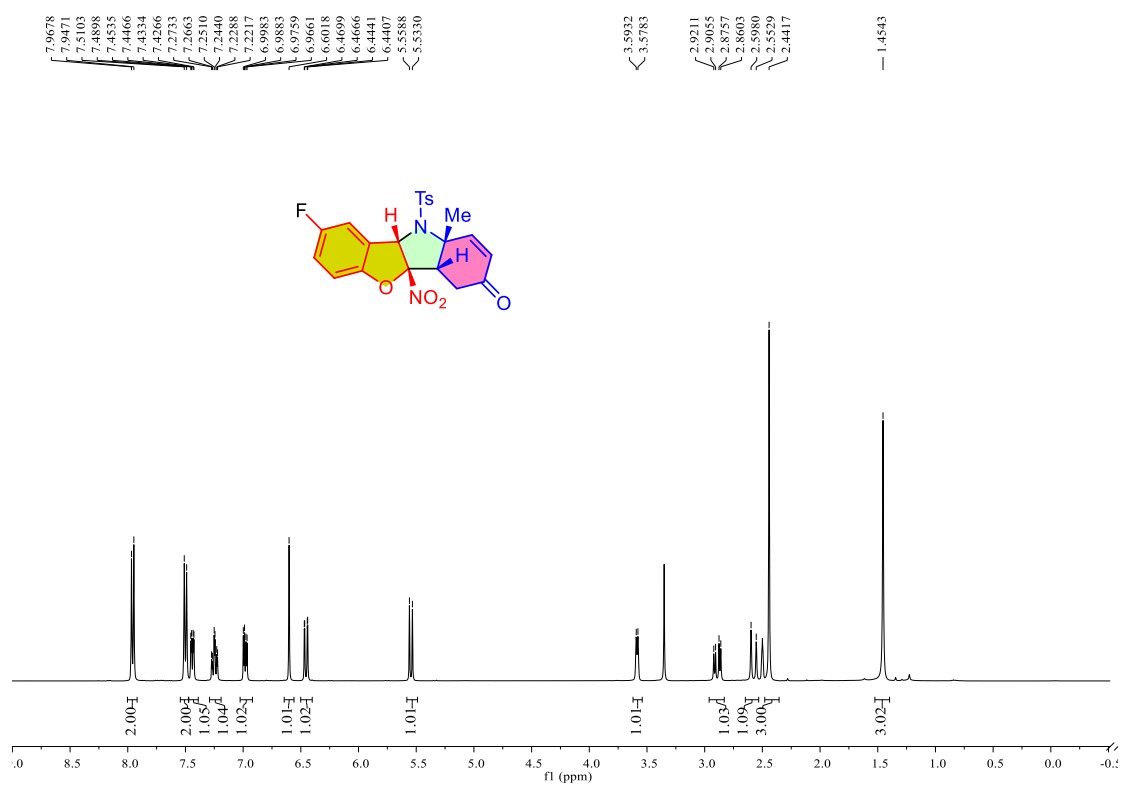

<sup>13</sup>C {<sup>1</sup>H} NMR (101 MHz, DMSO-*d*<sub>6</sub>) of **3af**

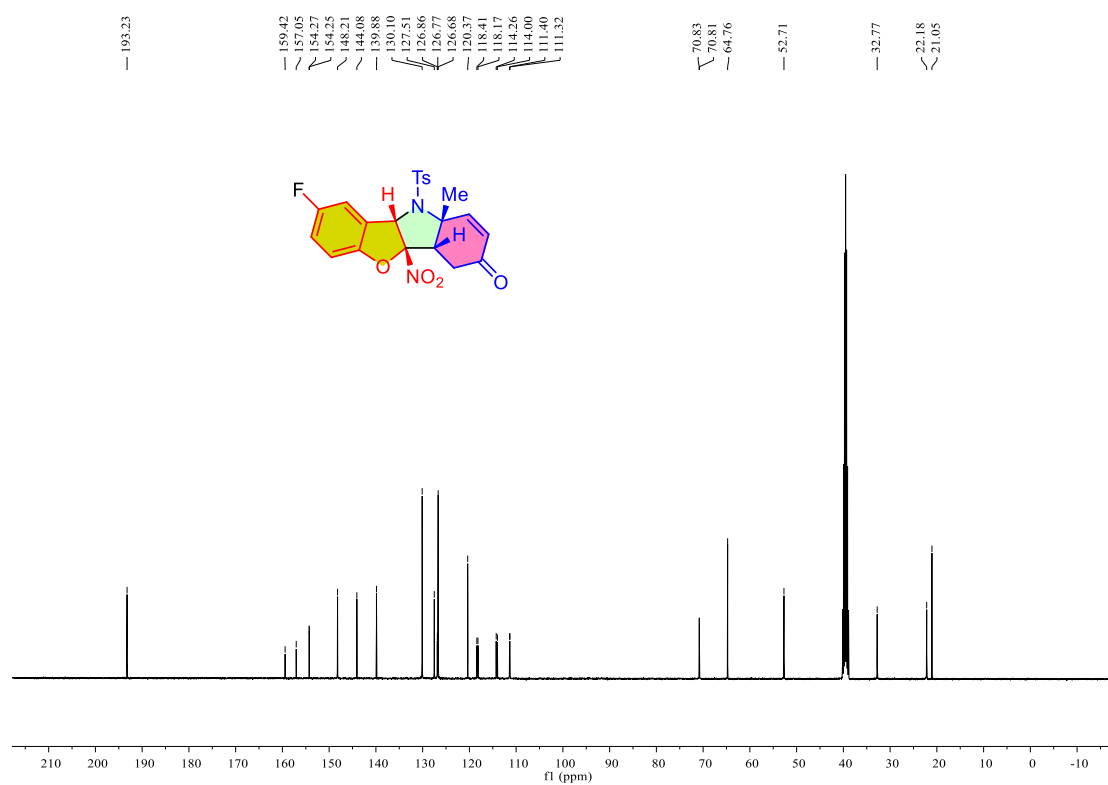



<sup>1</sup>H NMR (400 MHz, CDCl<sub>3</sub>) of **3ag**

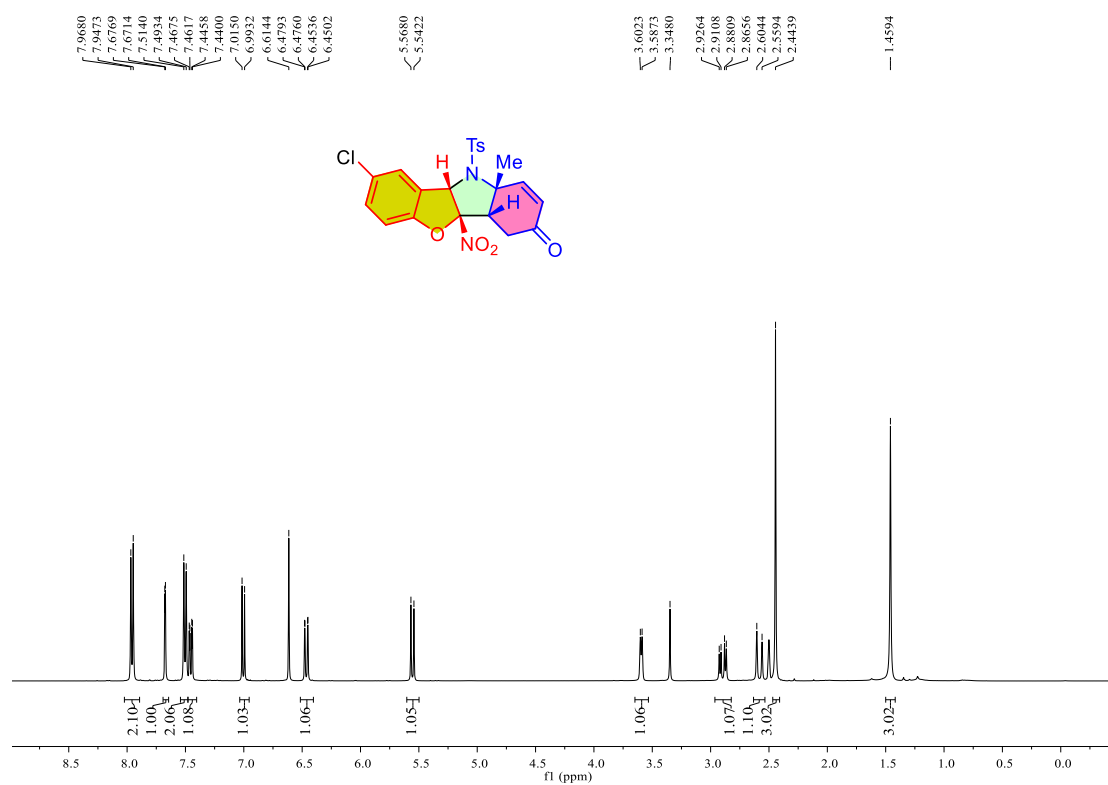

<sup>13</sup>C {<sup>1</sup>H} NMR (101 MHz, CDCl<sub>3</sub>) of **3ag**

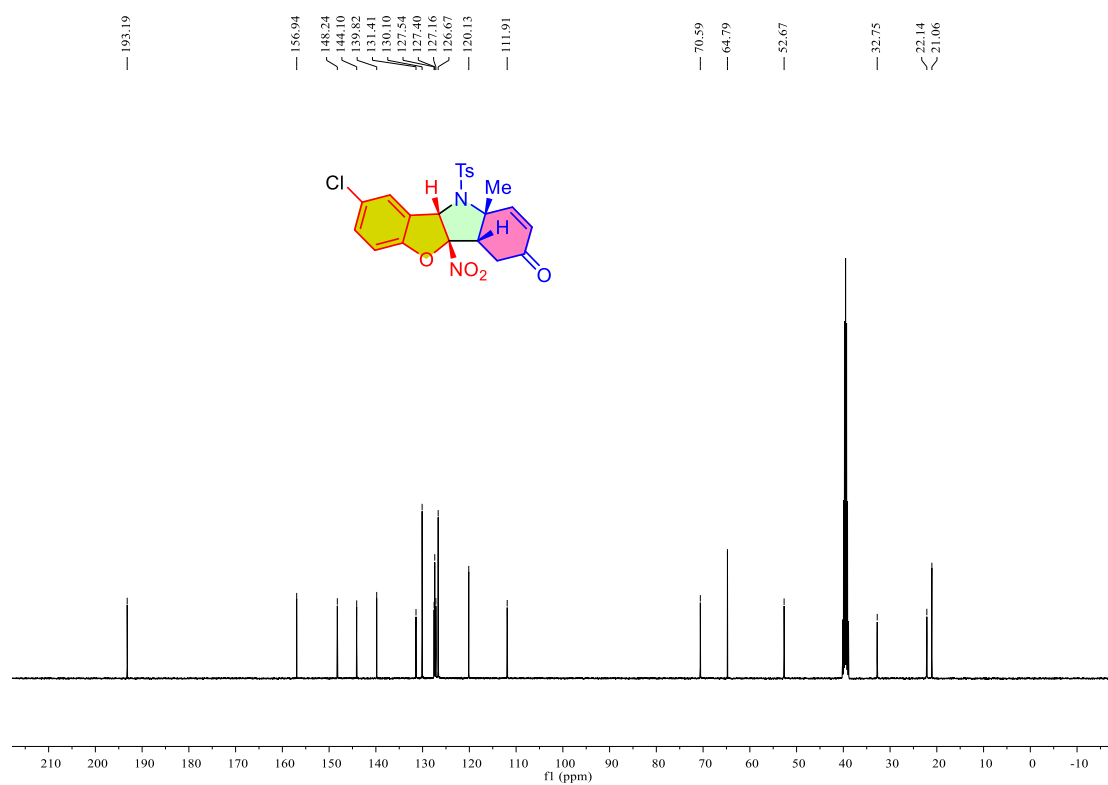

<sup>1</sup>H NMR (400 MHz, DMSO-*d*<sub>6</sub>) of **3ah**

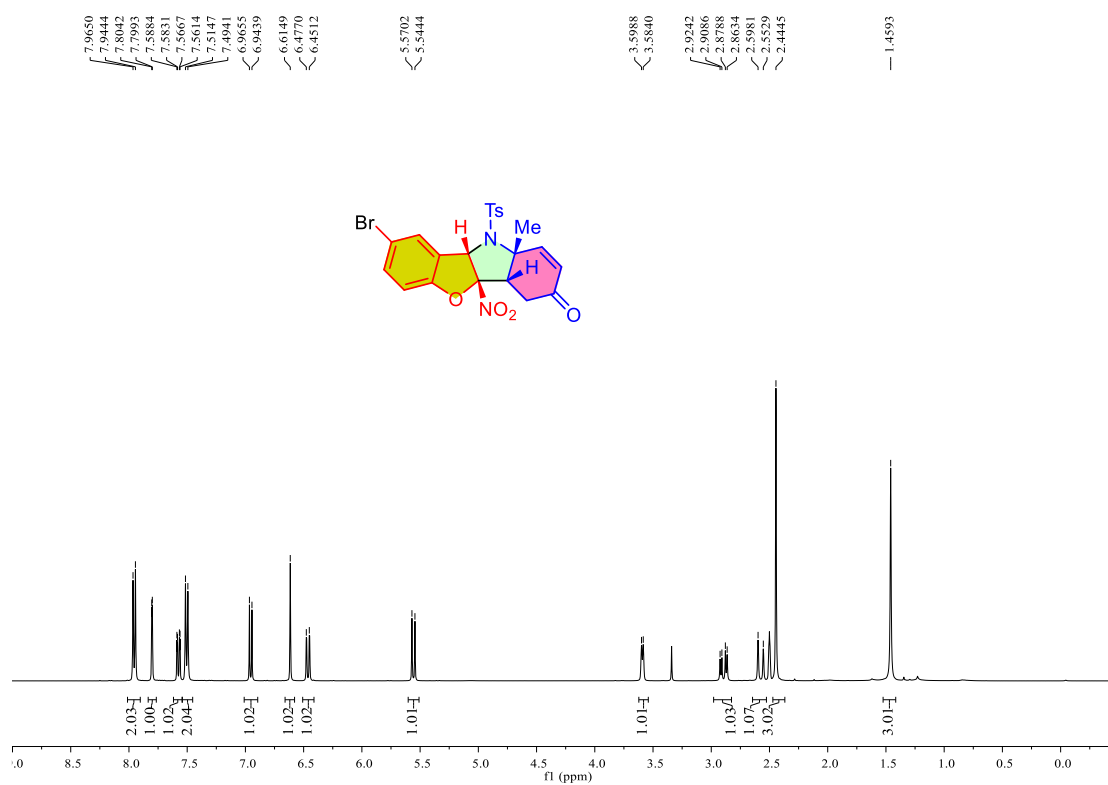

<sup>13</sup>C{<sup>1</sup>H} NMR (101 MHz, DMSO-*d*<sub>6</sub>) of **3ah**

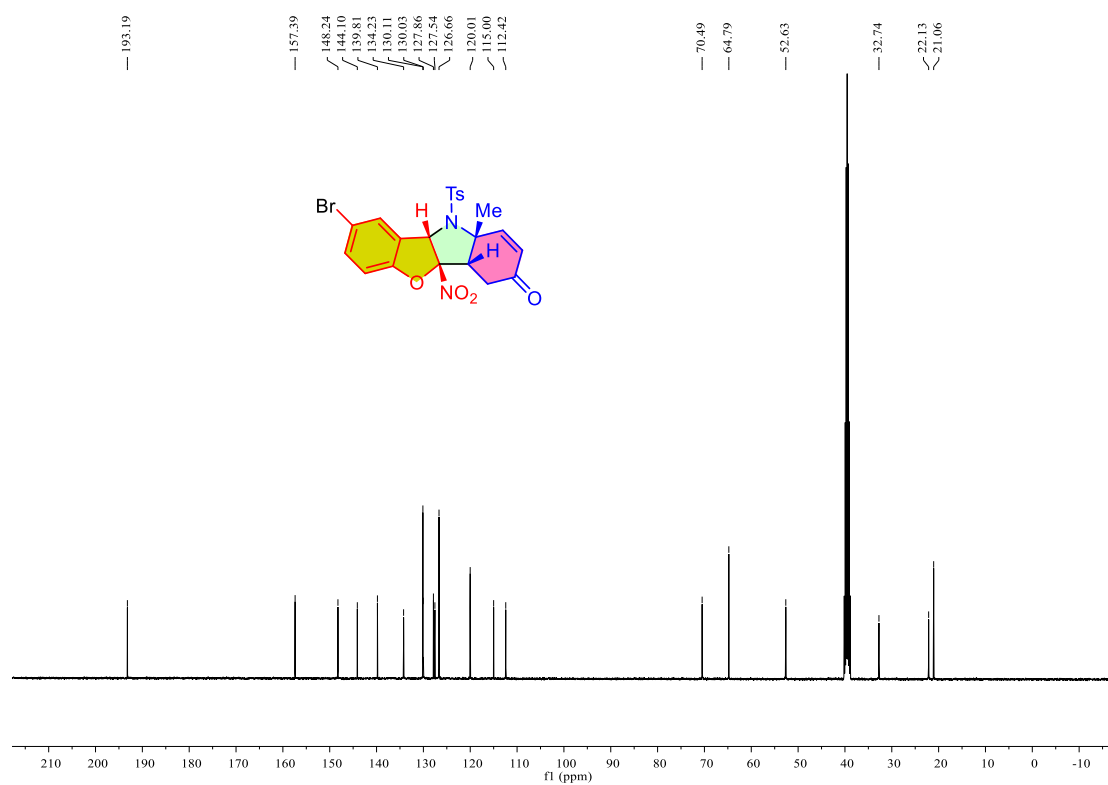

<sup>1</sup>H NMR (400 MHz, CDCl<sub>3</sub>) of **3ai**

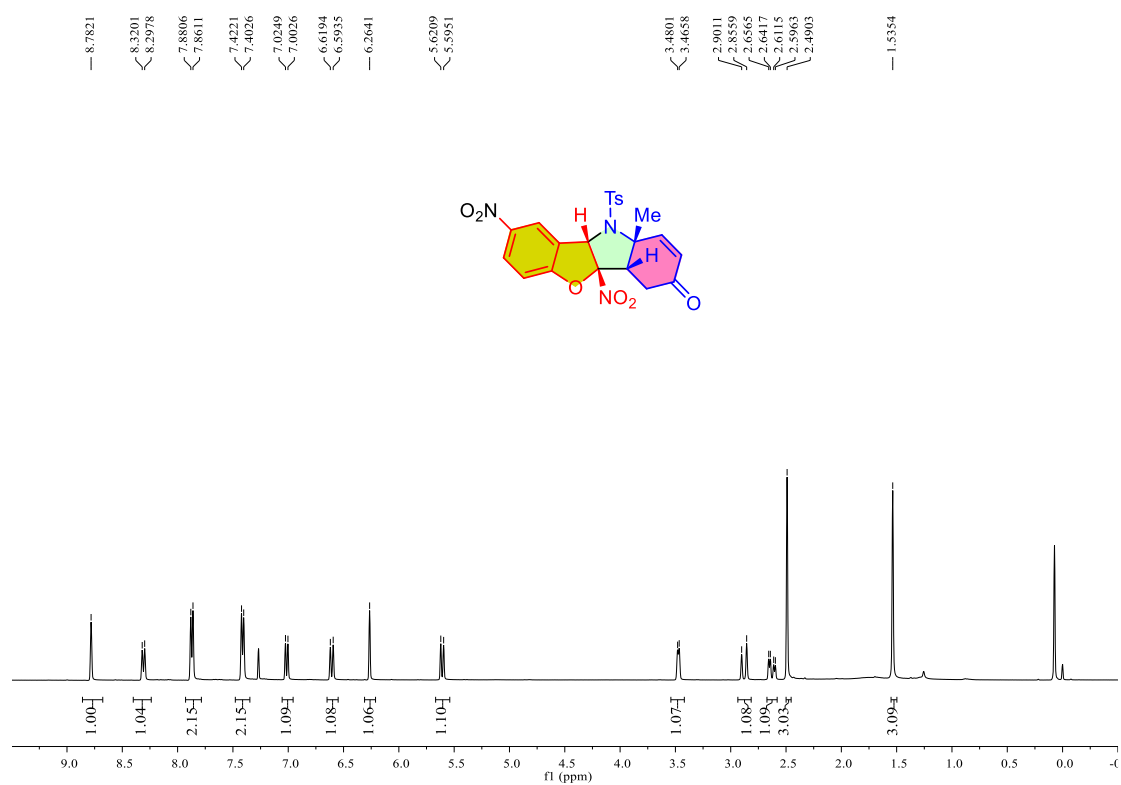

<sup>13</sup>C{<sup>1</sup>H} NMR (101 MHz, CDCl<sub>3</sub>) of **3ai**

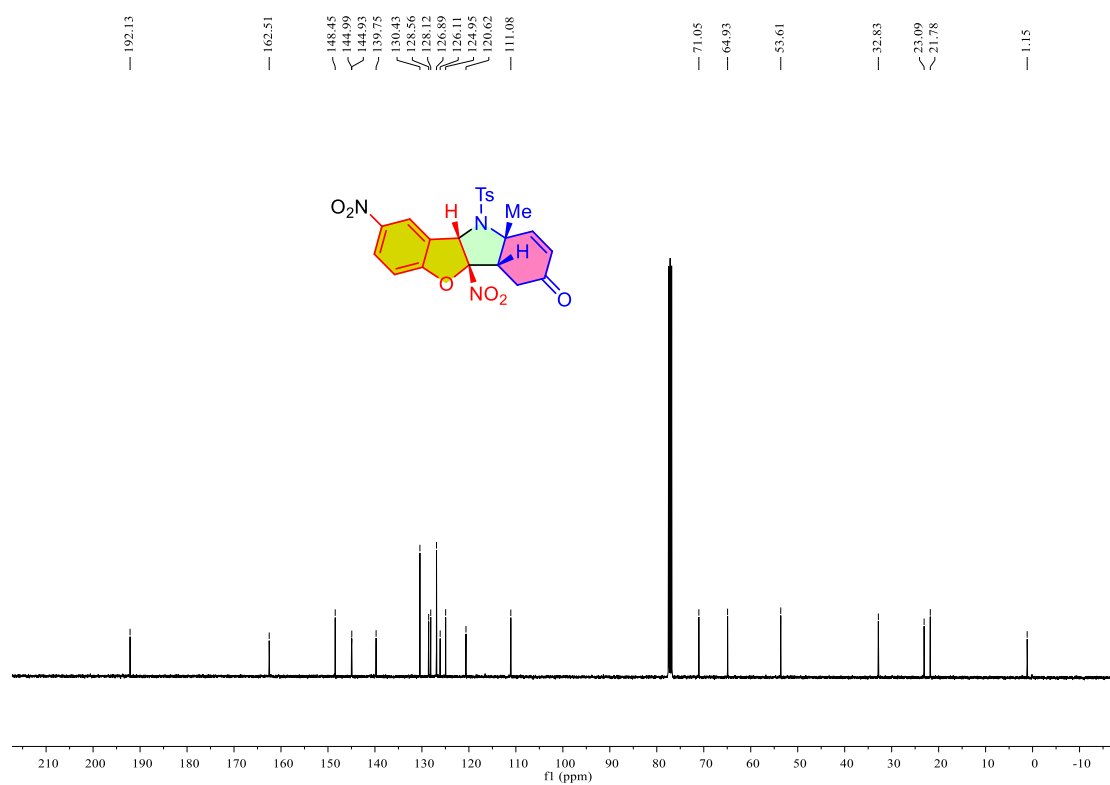

<sup>1</sup>H NMR (400 MHz, DMSO-*d*<sub>6</sub>) of **3aj**

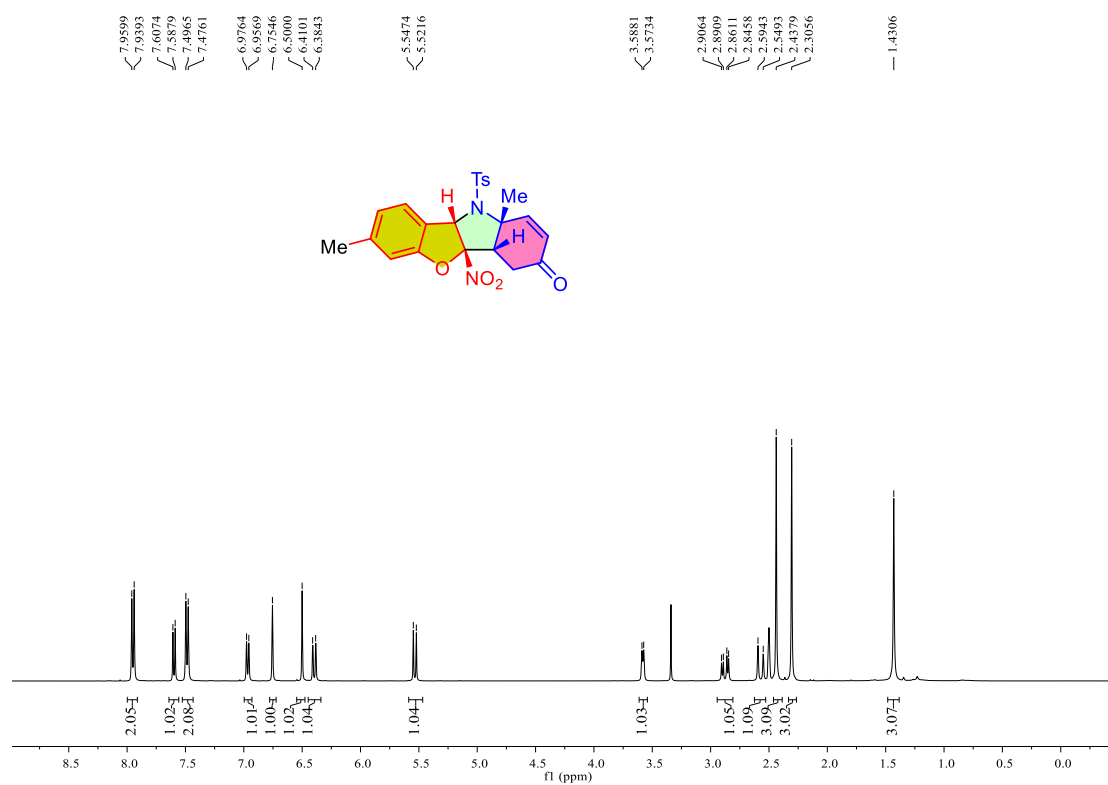

<sup>13</sup>C {<sup>1</sup>H} NMR (101 MHz, DMSO-*d*<sub>6</sub>) of **3aj**

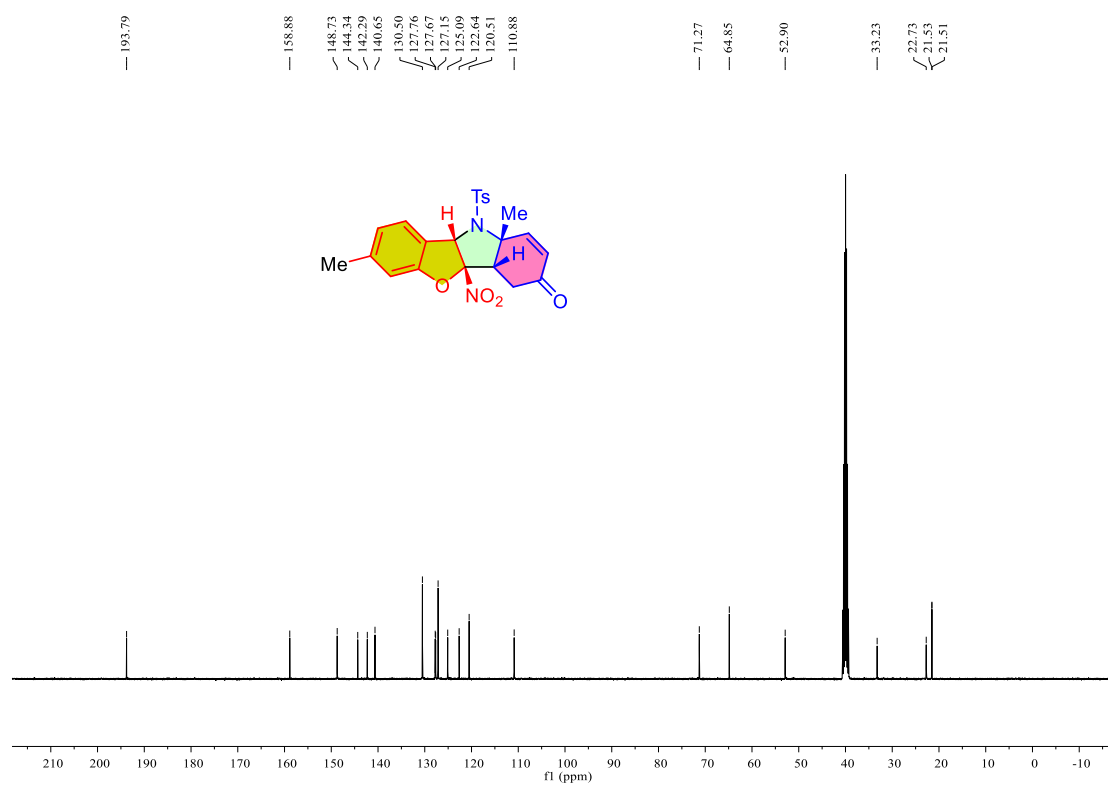

<sup>1</sup>H NMR (400 MHz, DMSO-*d*<sub>6</sub>) of **3ak**

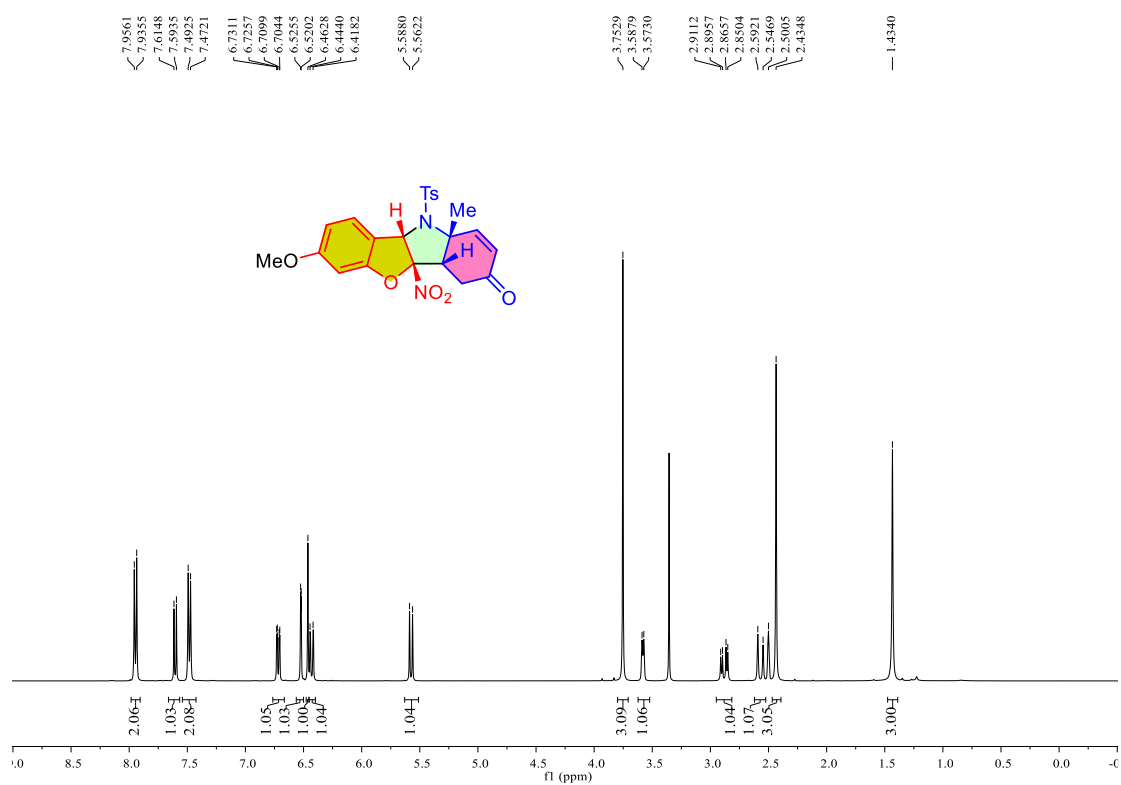

<sup>13</sup>C{<sup>1</sup>H} NMR (101 MHz, DMSO-*d*<sub>6</sub>) of **3ak**

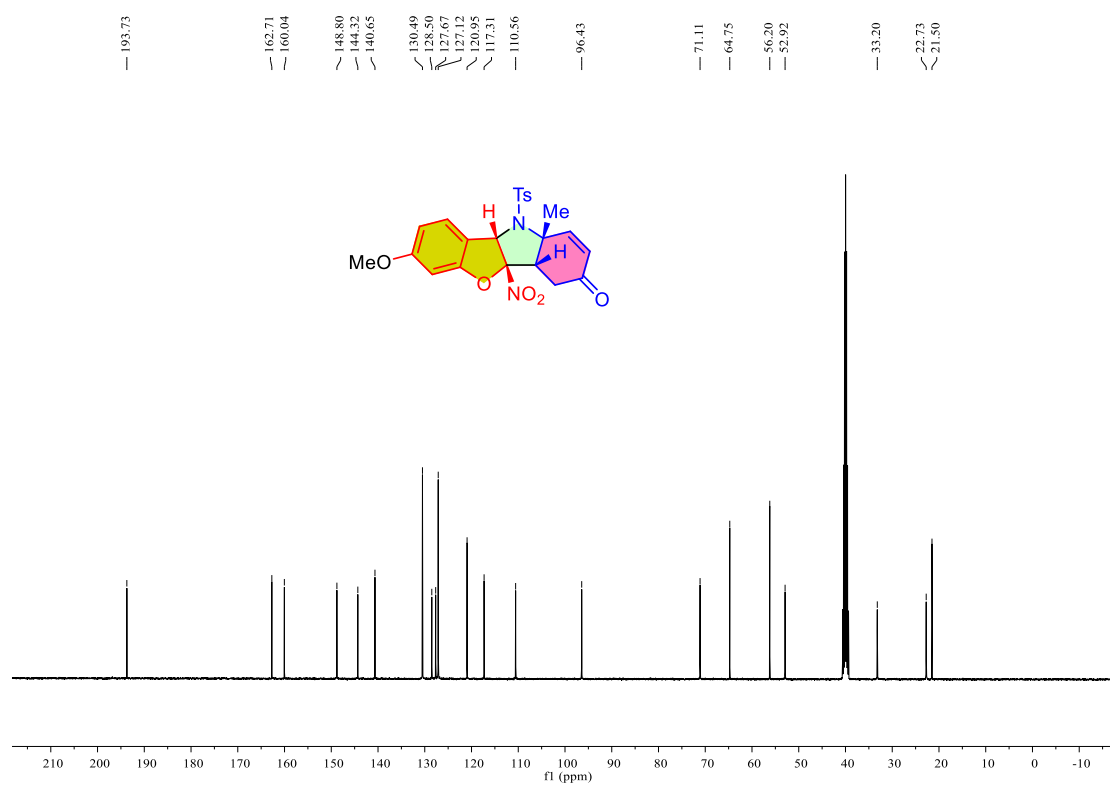

**Chemical structure of compound 10:** Cc1c(C(=O)O)c2c(c1)cc(F)cc2N(C(=O)O)C(=O)O

**<sup>1</sup>H NMR spectrum (CDCl<sub>3</sub>):**

| Chemical Shift (ppm) | Integration |
|----------------------|-------------|
| 1.4454               | 3.02        |
| 2.497                | 3.00        |
| 2.603                | 1.03        |
| 2.881                | 1.00        |
| 3.588                | 1.00        |
| 5.563                | 1.00        |
| 6.442                | 1.00        |
| 6.940                | 1.00        |
| 7.015                | 0.99        |
| 7.032                | 1.01        |
| 7.334                | 1.99        |
| 7.739                | 1.01        |
| 7.942                | 2.00        |

Chemical structure of compound 10 is shown above the  $^1\text{H}$  NMR spectrum. The structure is a tricyclic system with a fluorinated benzene ring, a furan ring, and a pyrrolidine ring. The pyrrolidine ring is substituted with a methyl group (Me), a tosyl group (Ts), and a nitro group ( $\text{NO}_2$ ). The furan ring is substituted with a fluorine atom (F). The benzene ring is substituted with a fluorine atom (F).

$^{13}\text{C}$  NMR peaks (ppm): 193.17, 165.22, 162.76, 159.17, 159.03, 148.33, 144.00, 140.01, 130.08, 128.85, 128.44, 127.40, 126.68, 121.55, 121.52, 120.55, 111.05, 110.82, 98.87, 98.59, 70.28, 64.51, 52.64, 32.71, 22.17, 21.05.

$^1\text{H}$  NMR peaks (ppm): 7.8, 7.6, 7.4, 7.2, 7.0, 6.8, 6.6, 6.4, 6.2, 6.0, 5.8, 5.6, 5.4, 5.2, 5.0, 4.8, 4.6, 4.4, 4.2, 4.0, 3.8, 3.6, 3.4, 3.2, 3.0, 2.8, 2.6, 2.4, 2.2, 2.0, 1.8, 1.6, 1.4, 1.2, 1.0, 0.8, 0.6, 0.4, 0.2, 0.0.

<sup>1</sup>H NMR (400 MHz, DMSO-*d*<sub>6</sub>) of **3am**

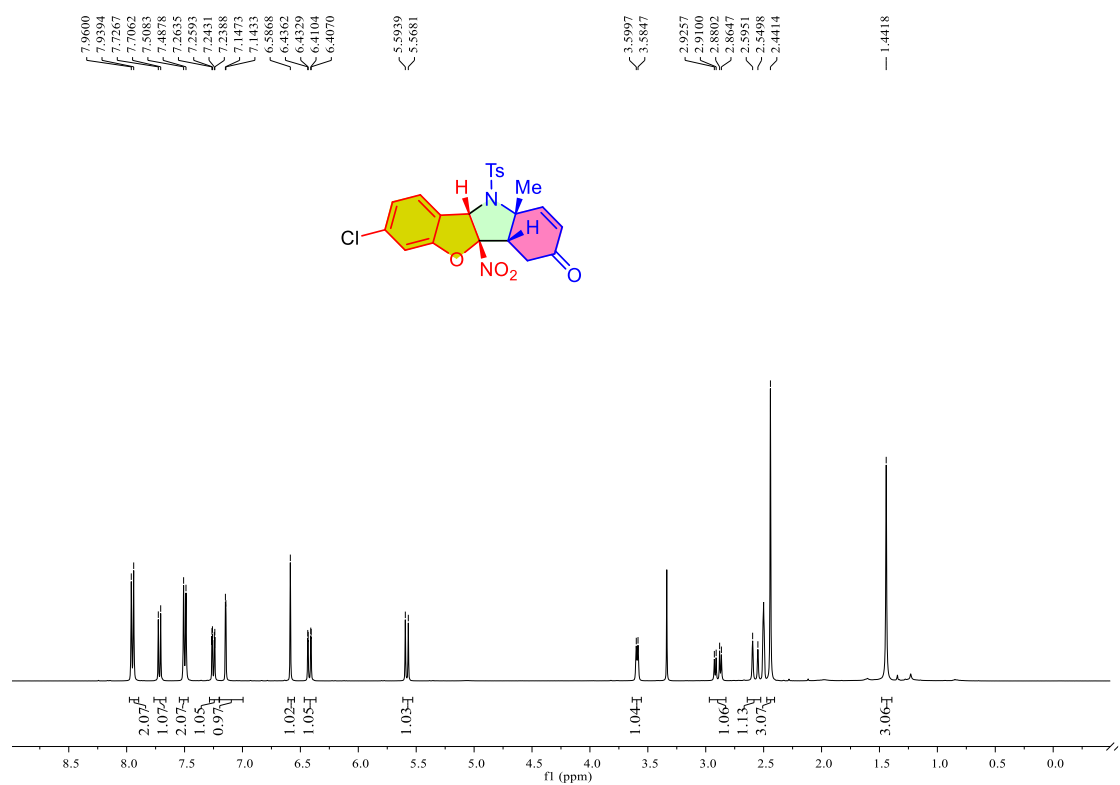

<sup>13</sup>C {<sup>1</sup>H} NMR (101 MHz, DMSO-*d*<sub>6</sub>) of **3am**

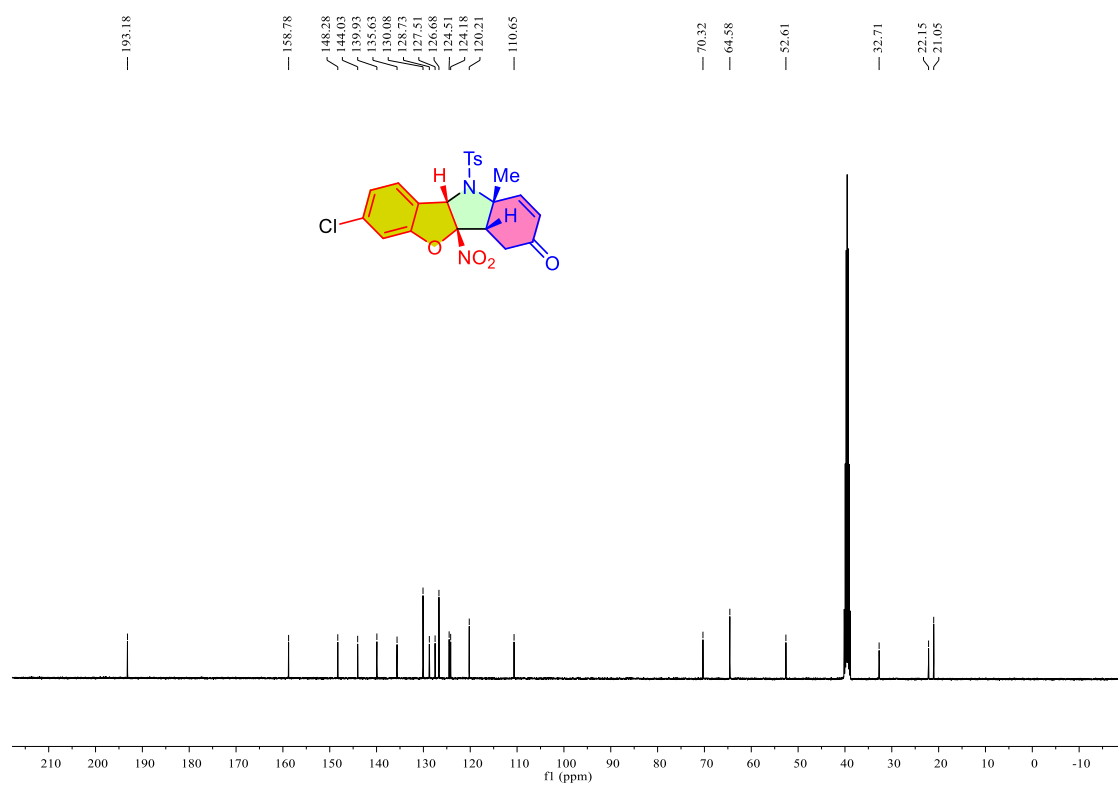

<sup>1</sup>H NMR (400 MHz, DMSO-*d*<sub>6</sub>) of **3an**

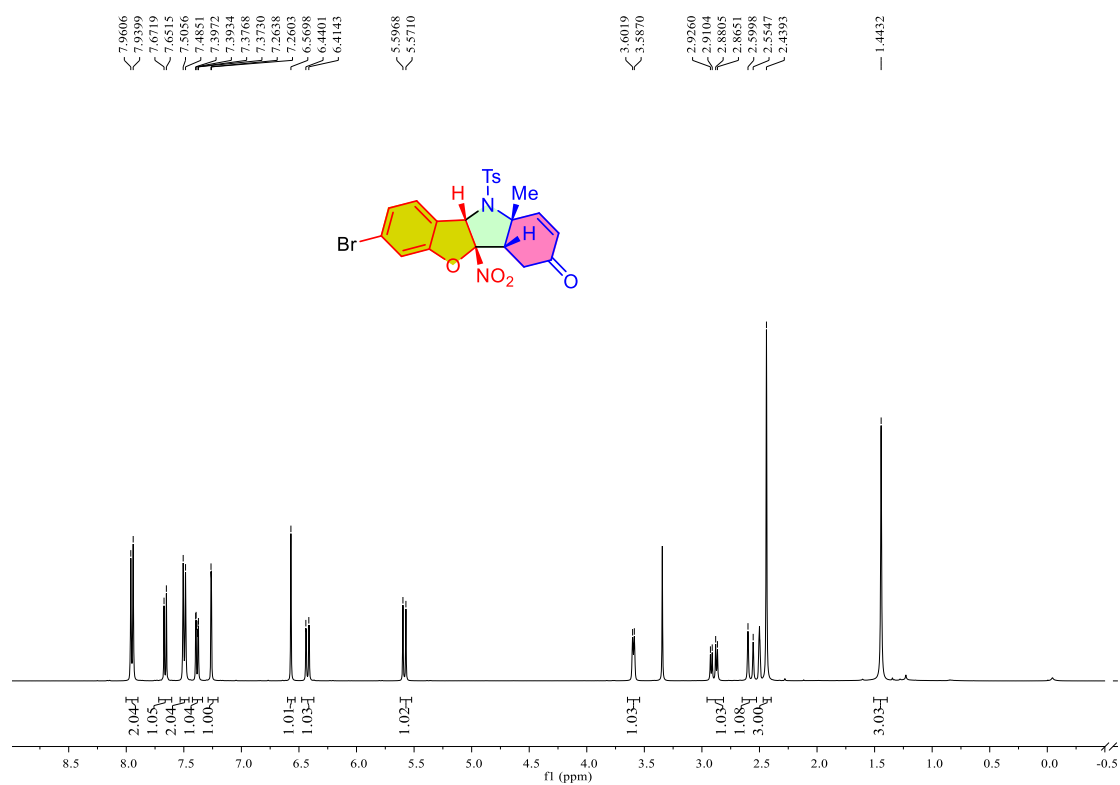

<sup>13</sup>C{<sup>1</sup>H} NMR (101 MHz, DMSO-*d*<sub>6</sub>) of **3an**

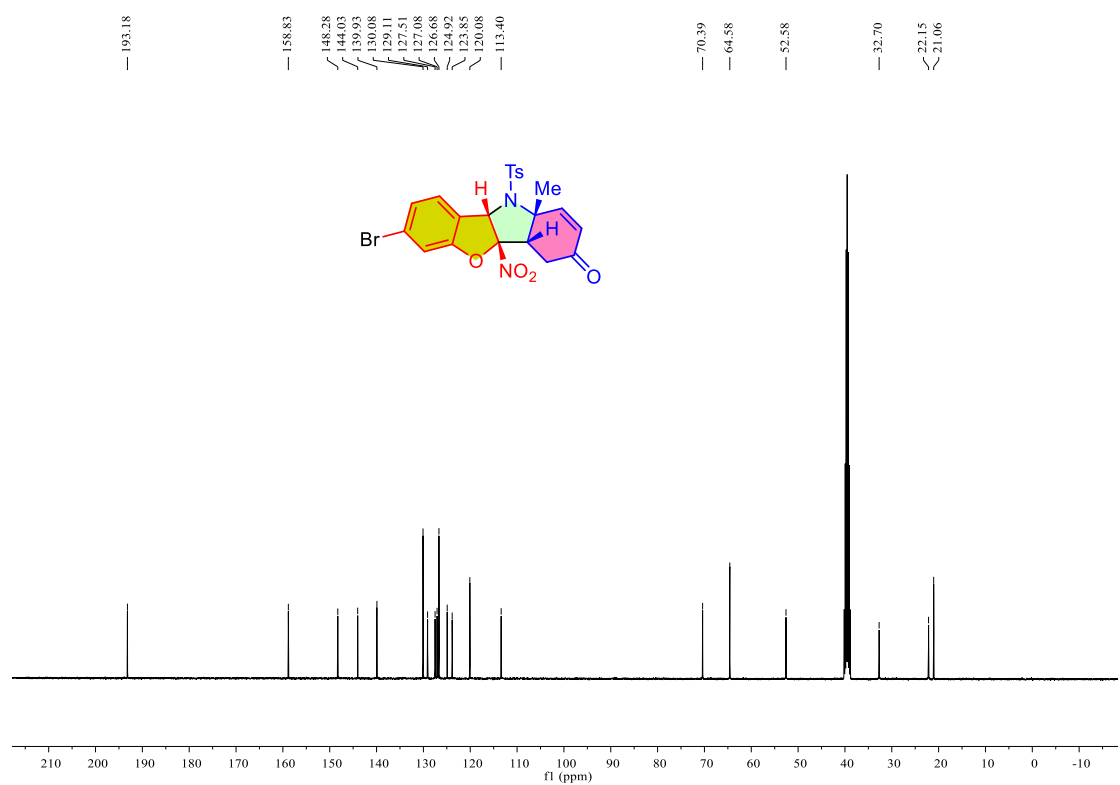



<sup>1</sup>H NMR (400 MHz, DMSO-*d*<sub>6</sub>) of **3ao**

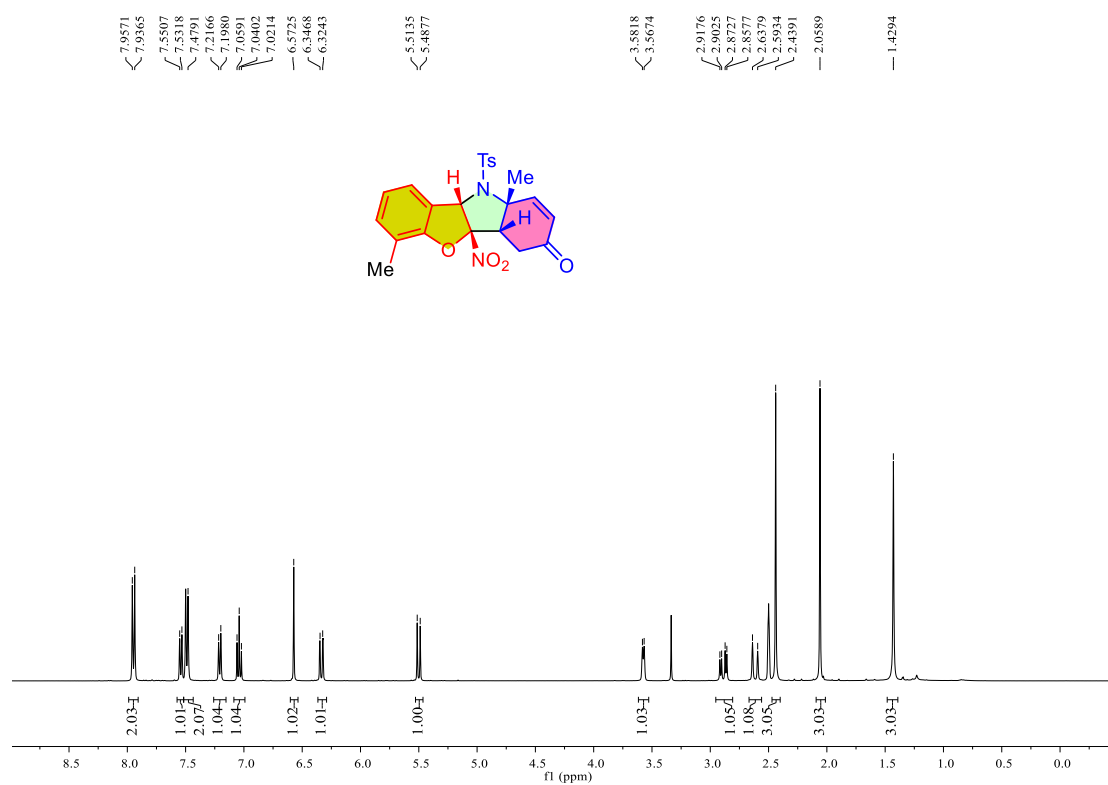

<sup>13</sup>C{<sup>1</sup>H} NMR (101 MHz, DMSO-*d*<sub>6</sub>) of **3ao**

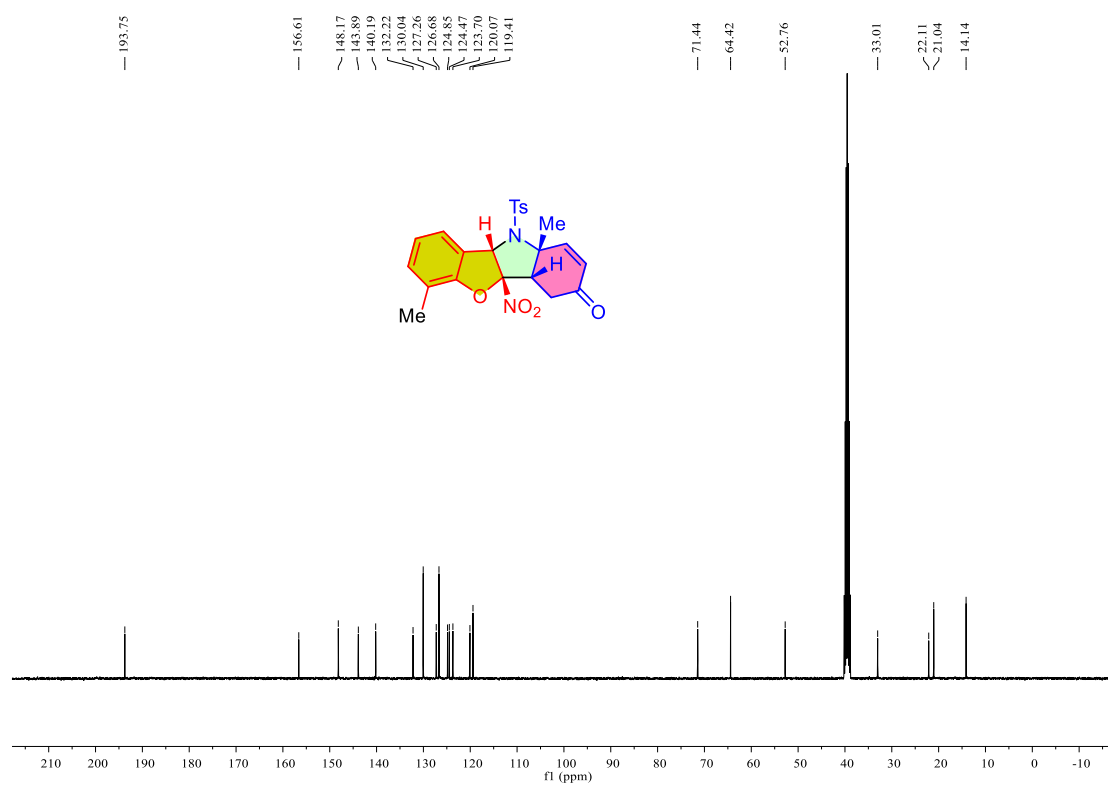

<sup>1</sup>H NMR (400 MHz, CDCl<sub>3</sub>) of **3ap**

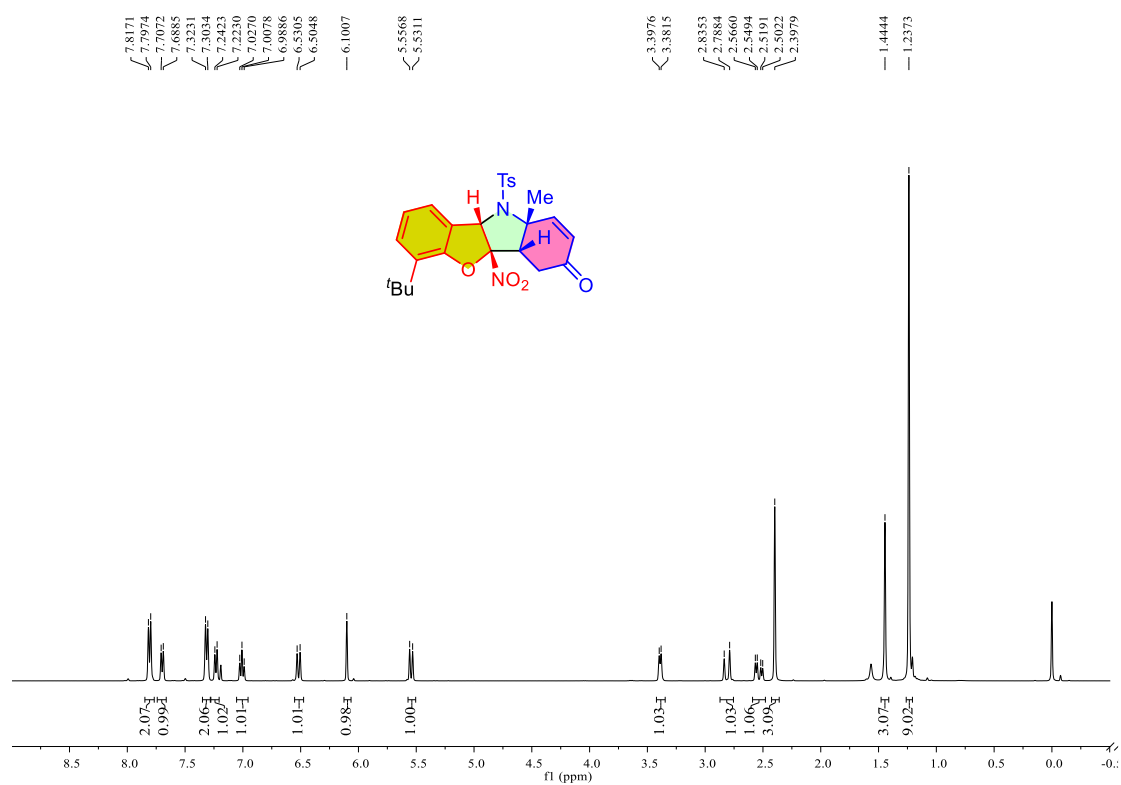

<sup>13</sup>C {<sup>1</sup>H} NMR (101 MHz, CDCl<sub>3</sub>) of **3ap**

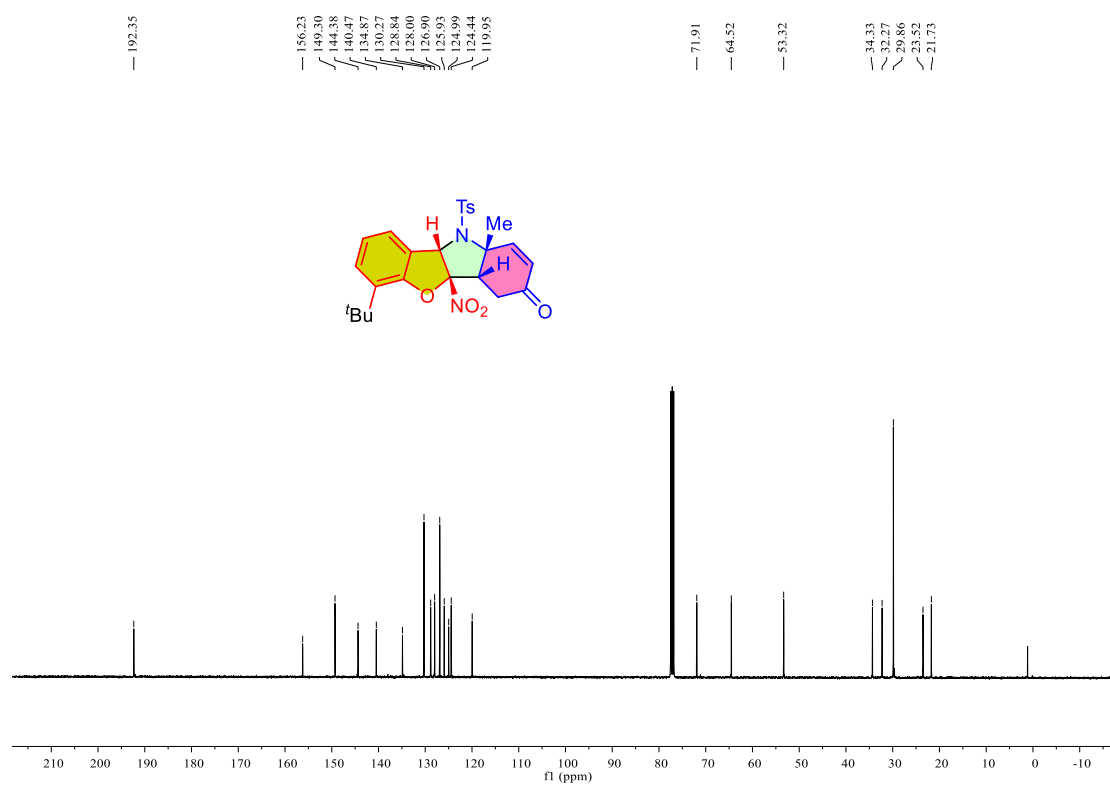

<sup>1</sup>H NMR (400 MHz, DMSO-*d*<sub>6</sub>) of **3aq**

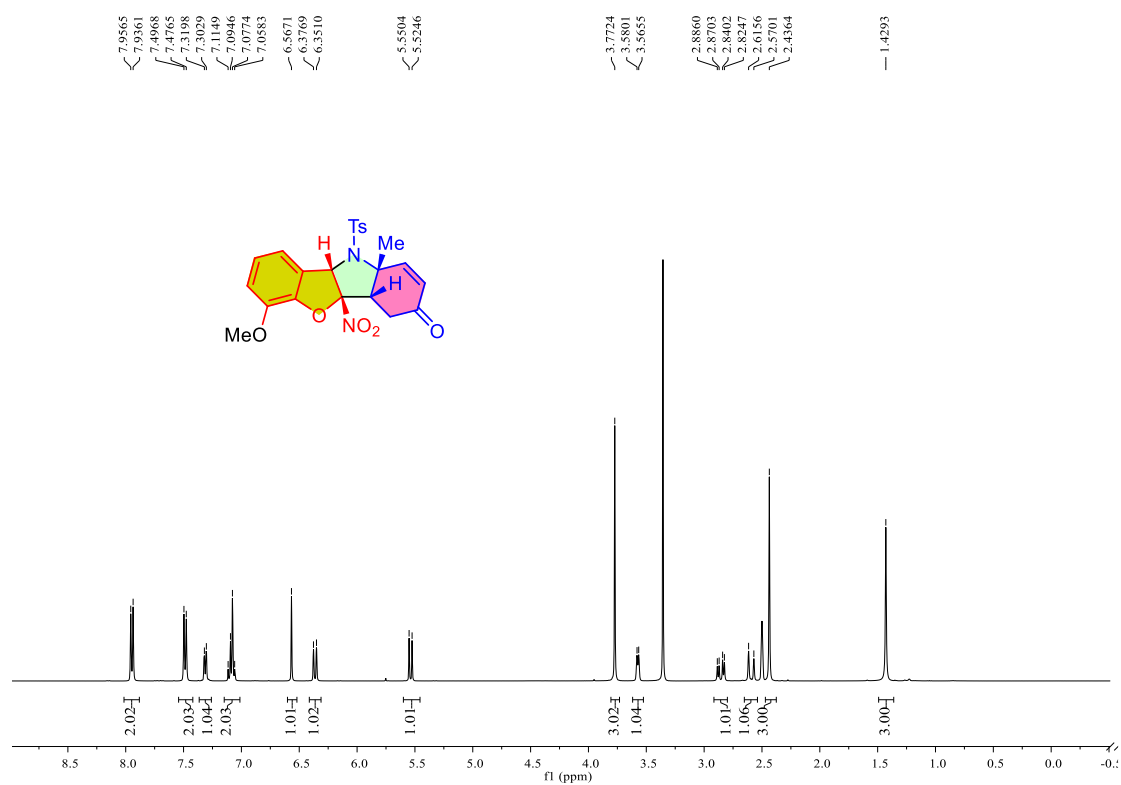

<sup>13</sup>C{<sup>1</sup>H} NMR (101 MHz, DMSO-*d*<sub>6</sub>) of **3aq**

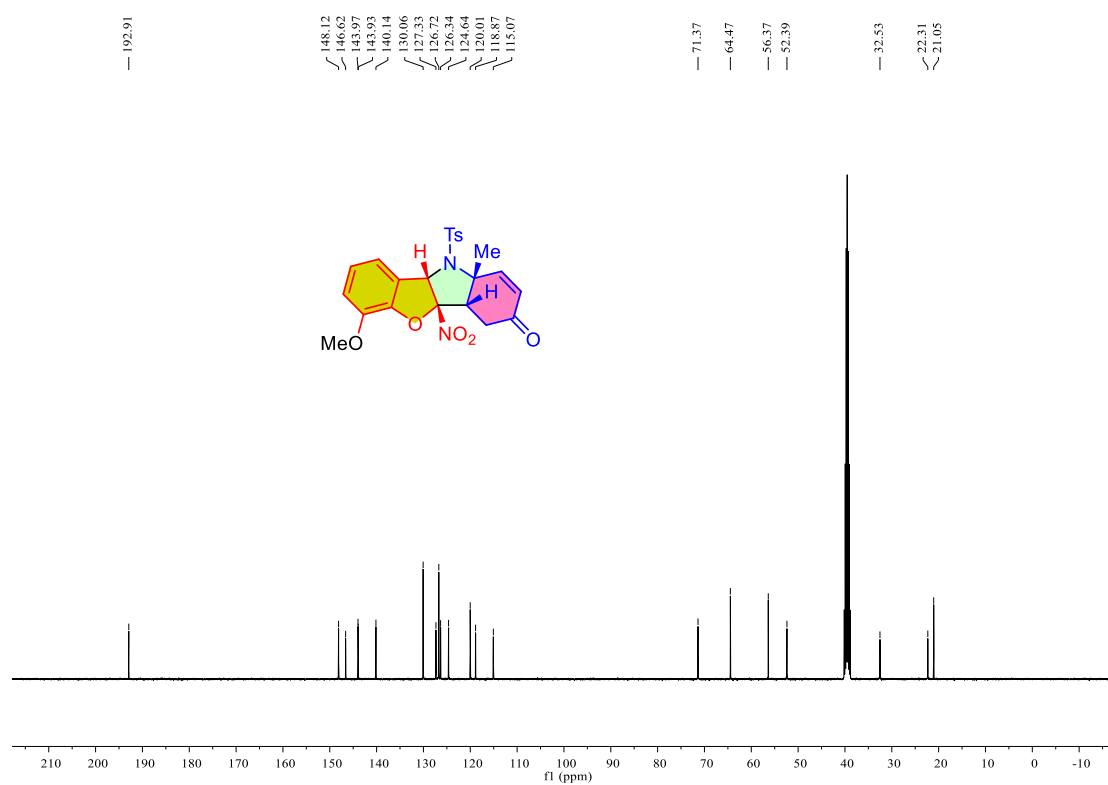

<sup>1</sup>H NMR (400 MHz, DMSO-*d*<sub>6</sub>) of **3ar**

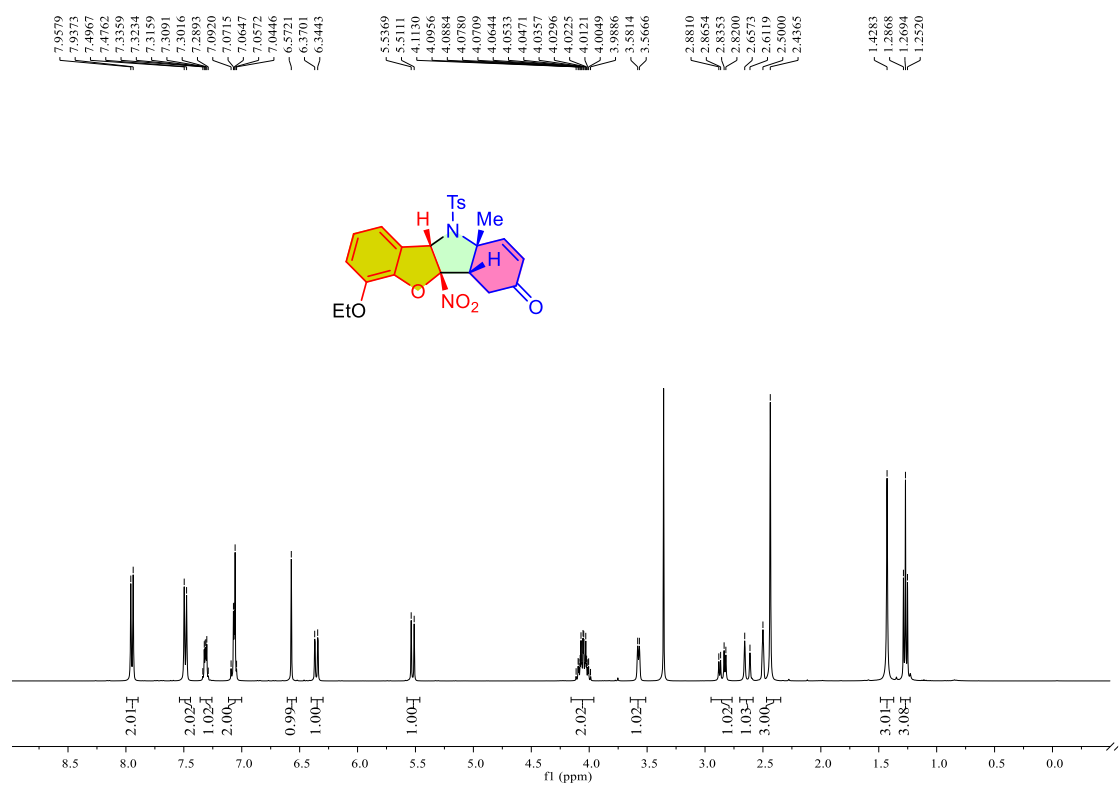

<sup>13</sup>C{<sup>1</sup>H} NMR (101 MHz, DMSO-*d*<sub>6</sub>) of **3ar**

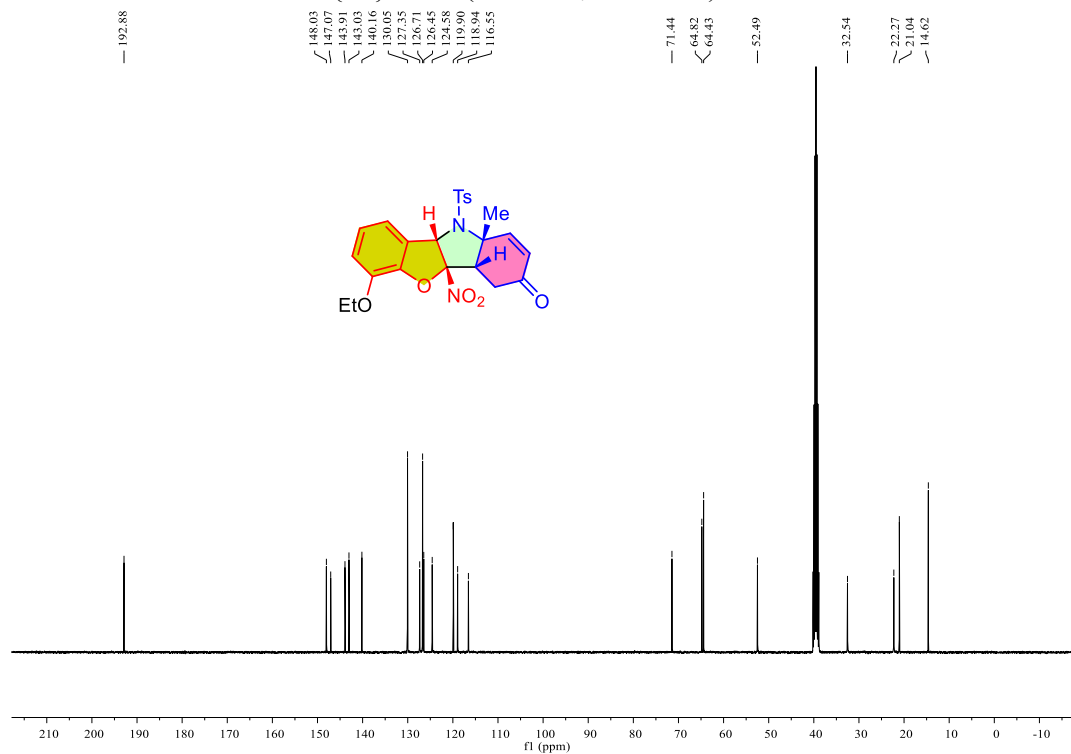

<sup>1</sup>H NMR (400 MHz, DMSO-*d*<sub>6</sub>) of **3as**

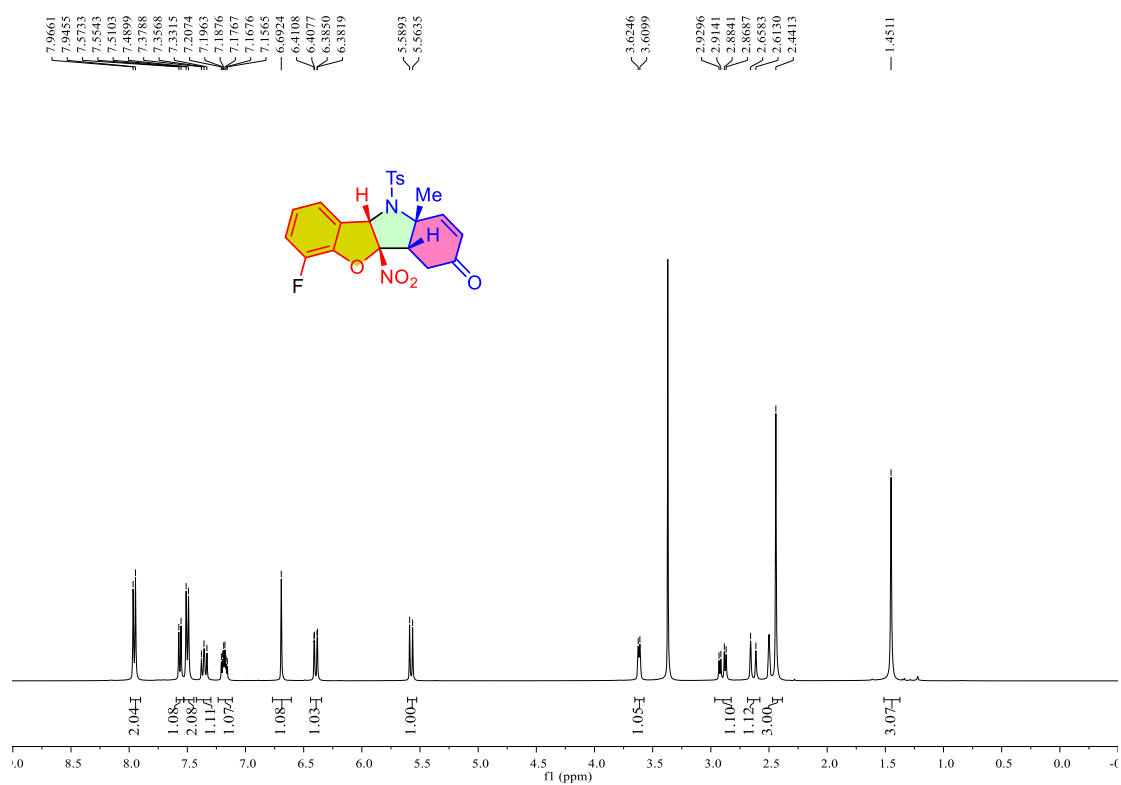

<sup>13</sup>C {<sup>1</sup>H} NMR (101 MHz, DMSO-*d*<sub>6</sub>) of **3as**

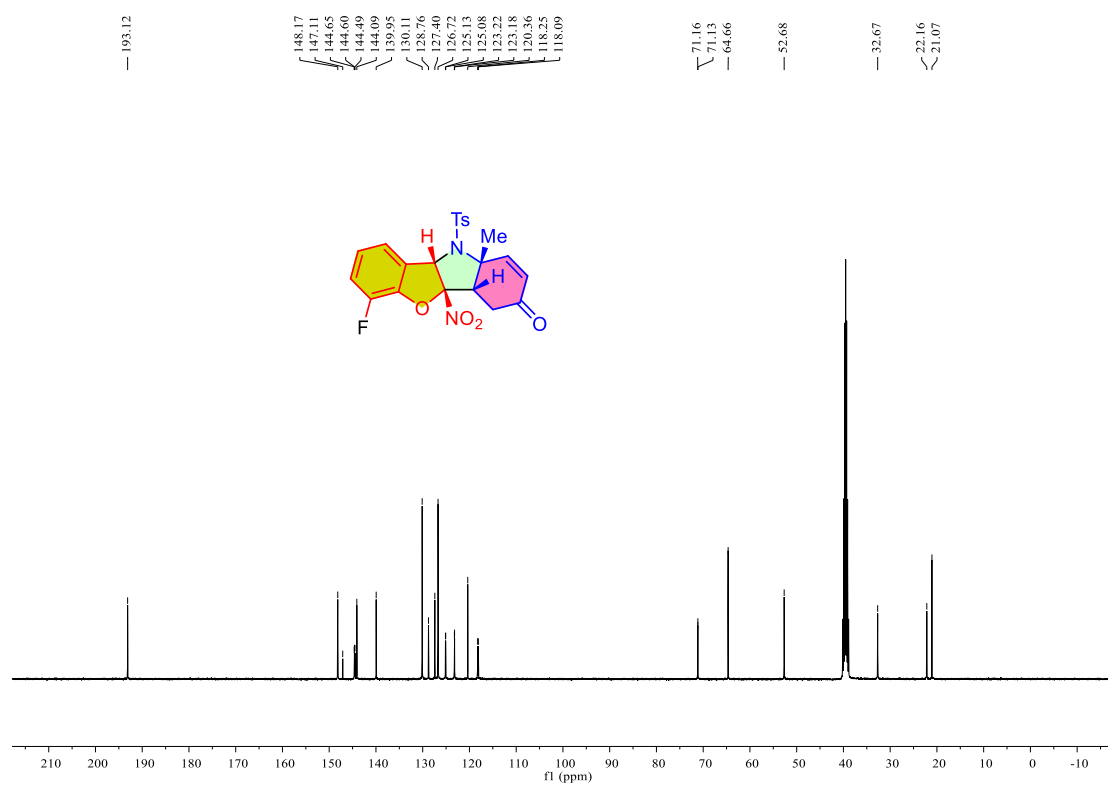

<sup>1</sup>H NMR (400 MHz, DMSO-*d*<sub>6</sub>) of **3at**

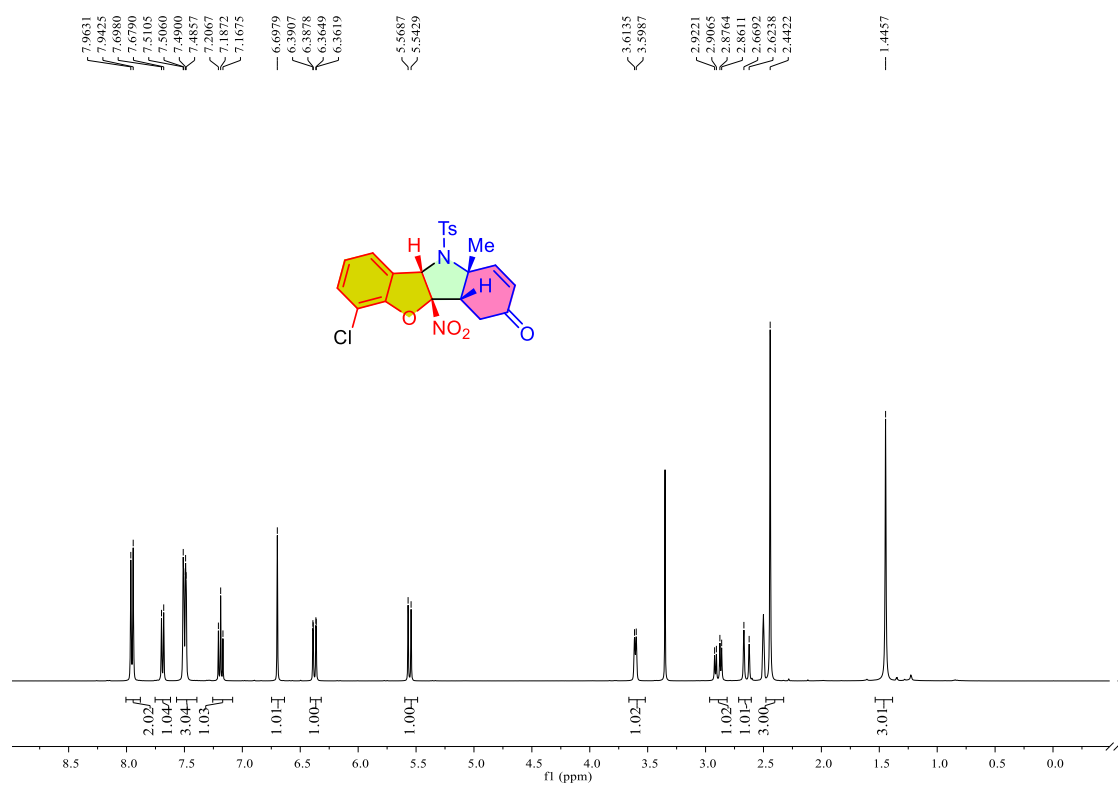

<sup>13</sup>C {<sup>1</sup>H} NMR (101 MHz, DMSO-*d*<sub>6</sub>) of **3at**

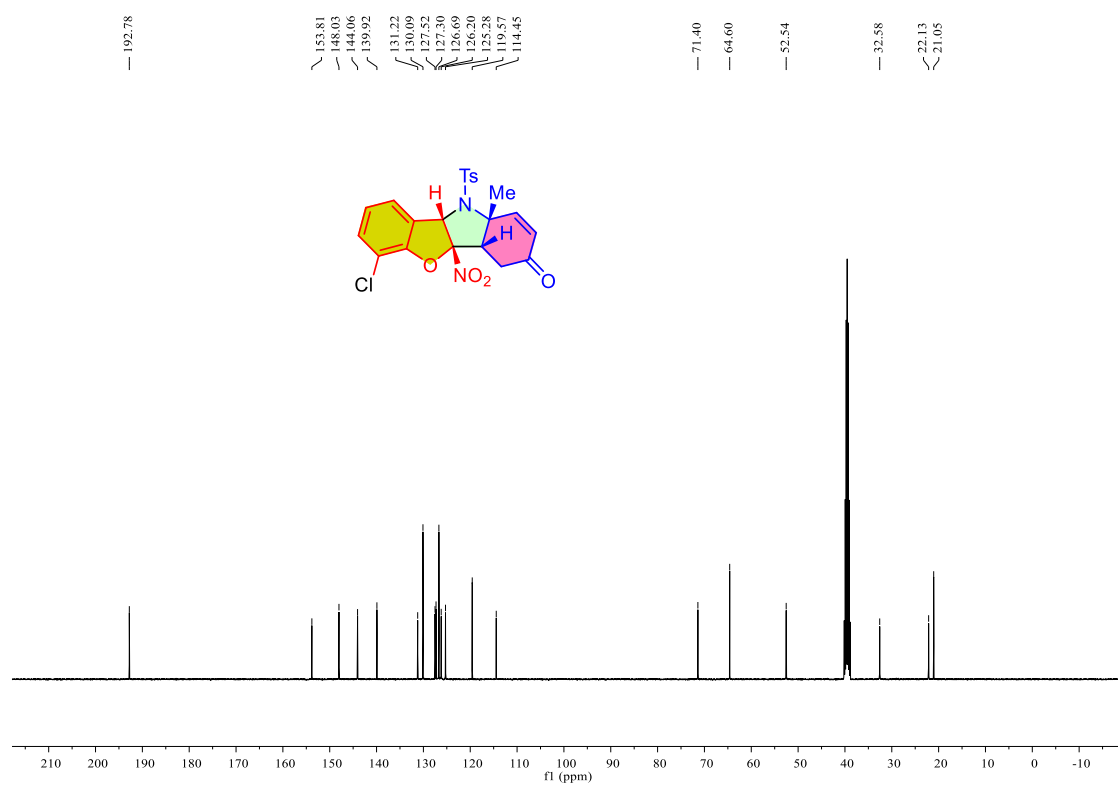

<sup>1</sup>H NMR (400 MHz, DMSO-*d*<sub>6</sub>) of **3au**

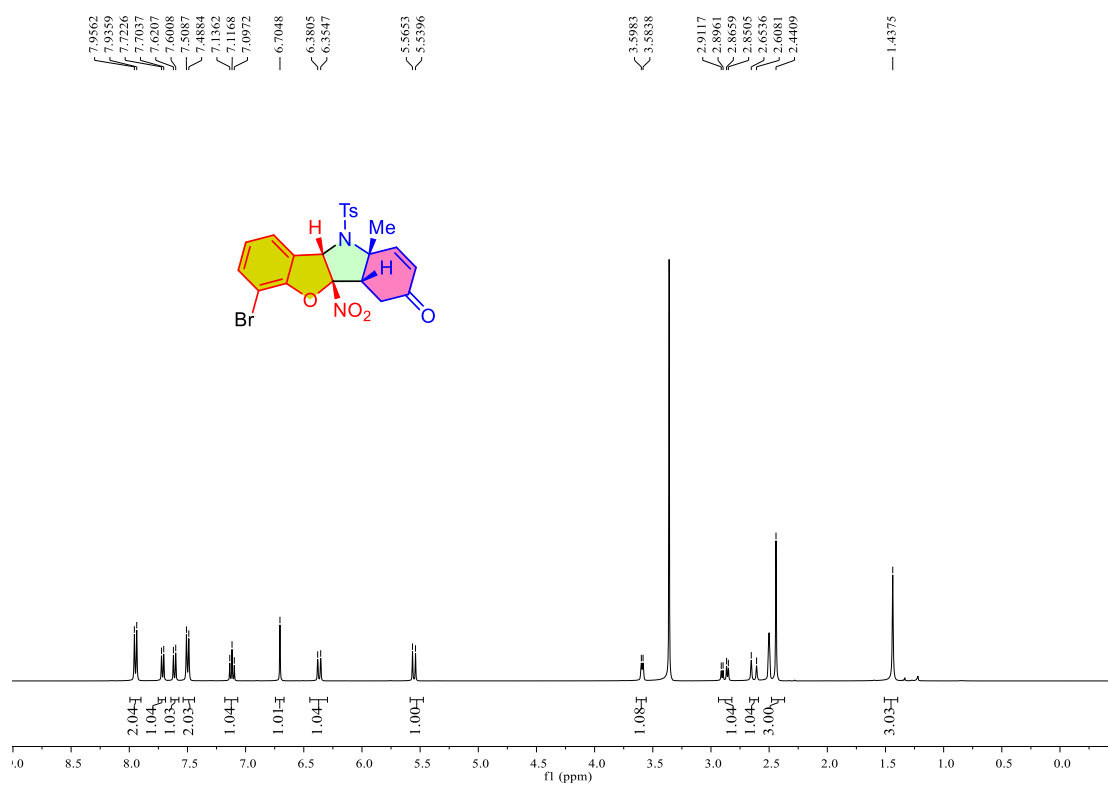

<sup>13</sup>C{<sup>1</sup>H} NMR (101 MHz, DMSO-*d*<sub>6</sub>) of **3au**

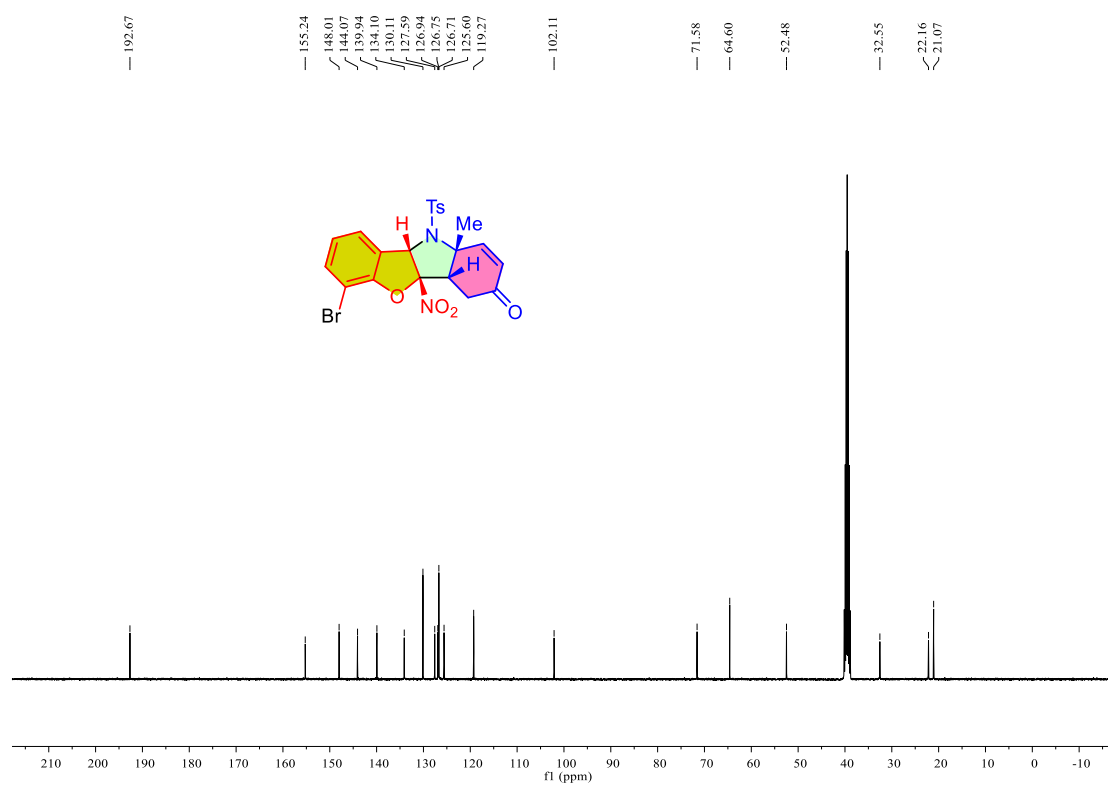

<sup>1</sup>H NMR (400 MHz, CDCl<sub>3</sub>) of **3av**

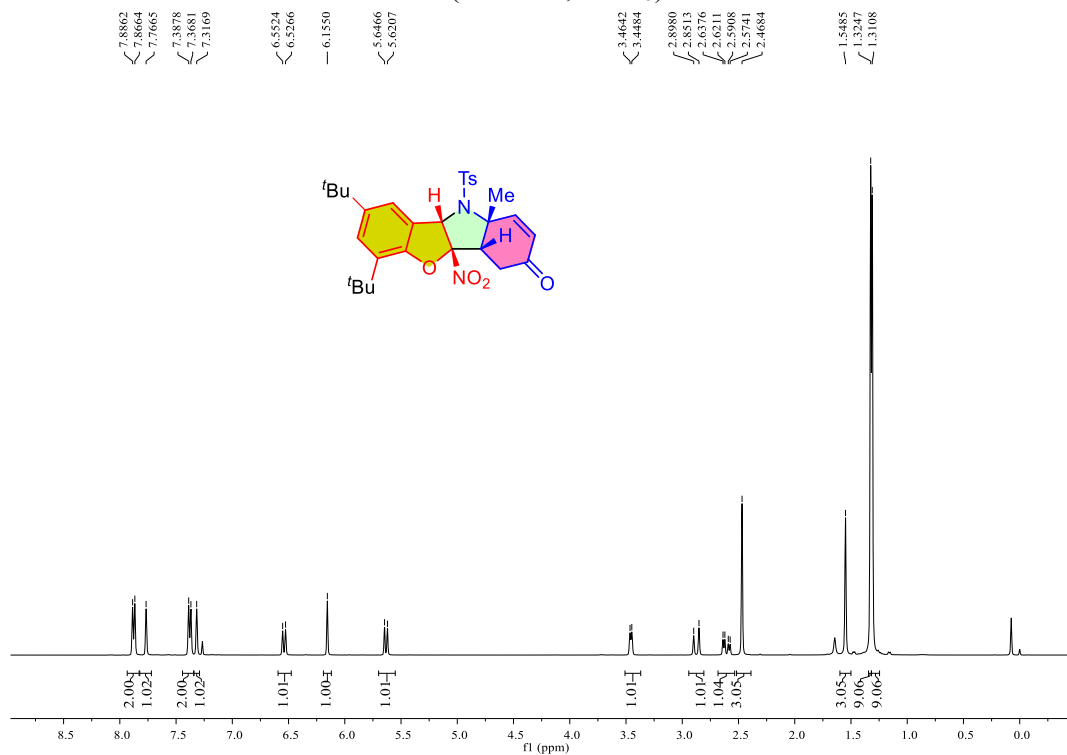

<sup>13</sup>C{<sup>1</sup>H} NMR (101 MHz, CDCl<sub>3</sub>) of **3av**

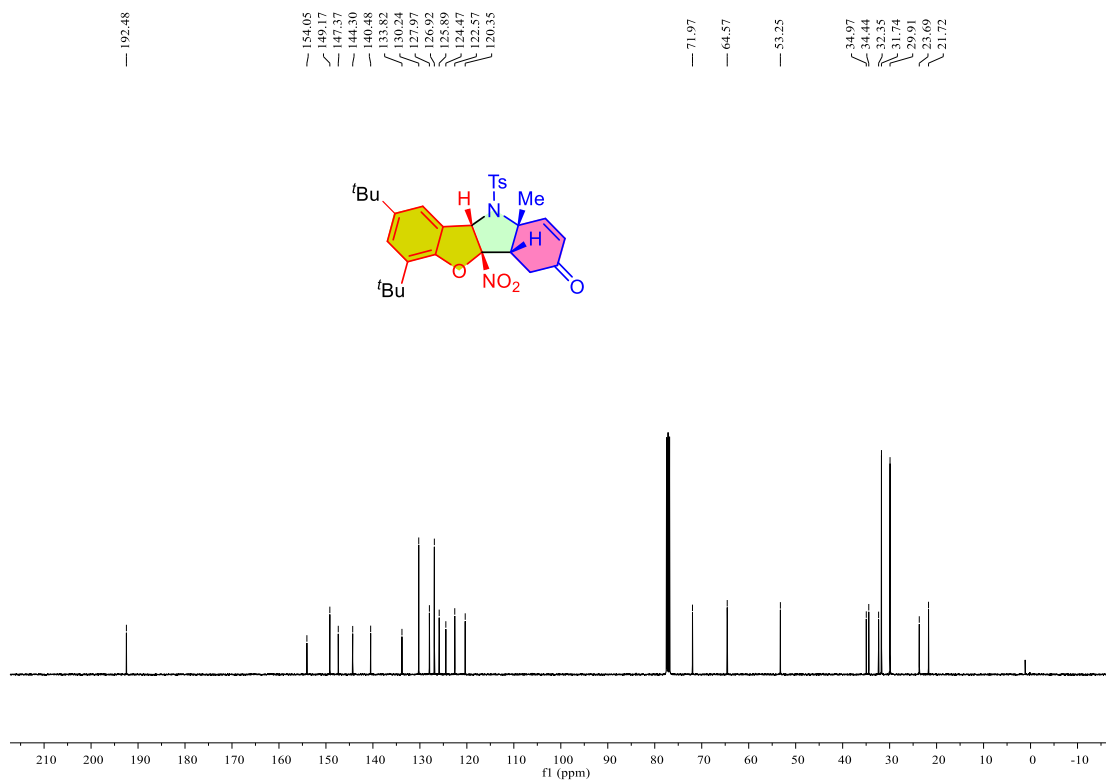



<sup>1</sup>H NMR (400 MHz, CDCl<sub>3</sub>) of **3aw**

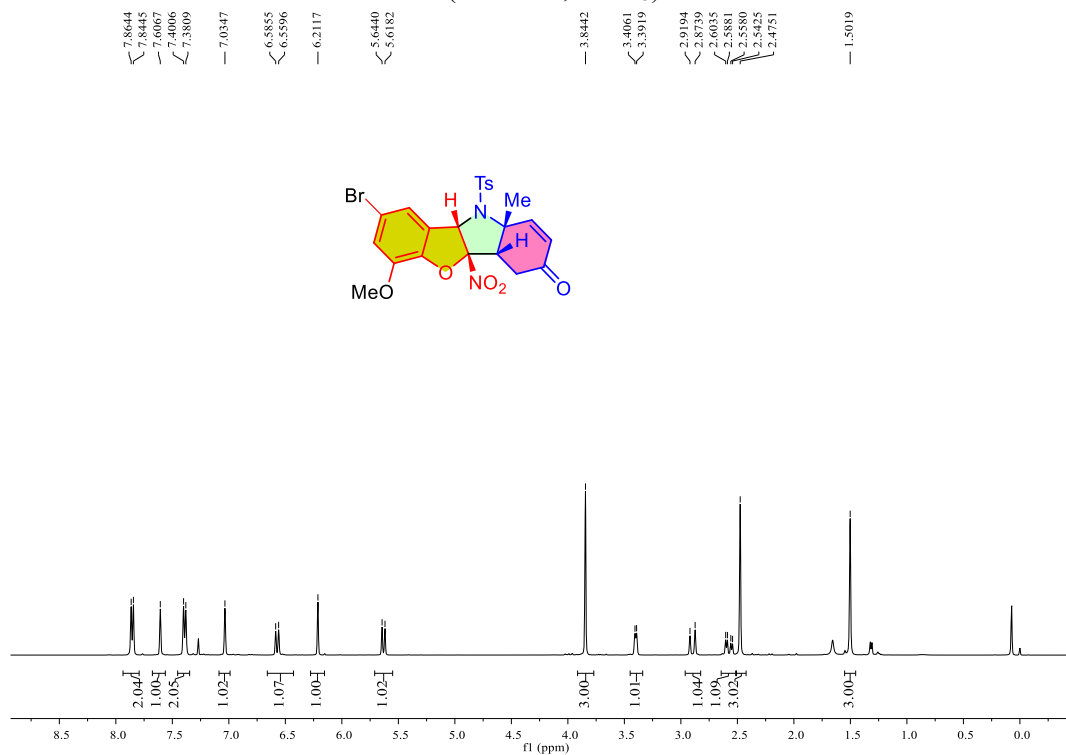

<sup>13</sup>C{<sup>1</sup>H} NMR (101 MHz, CDCl<sub>3</sub>) of **3aw**

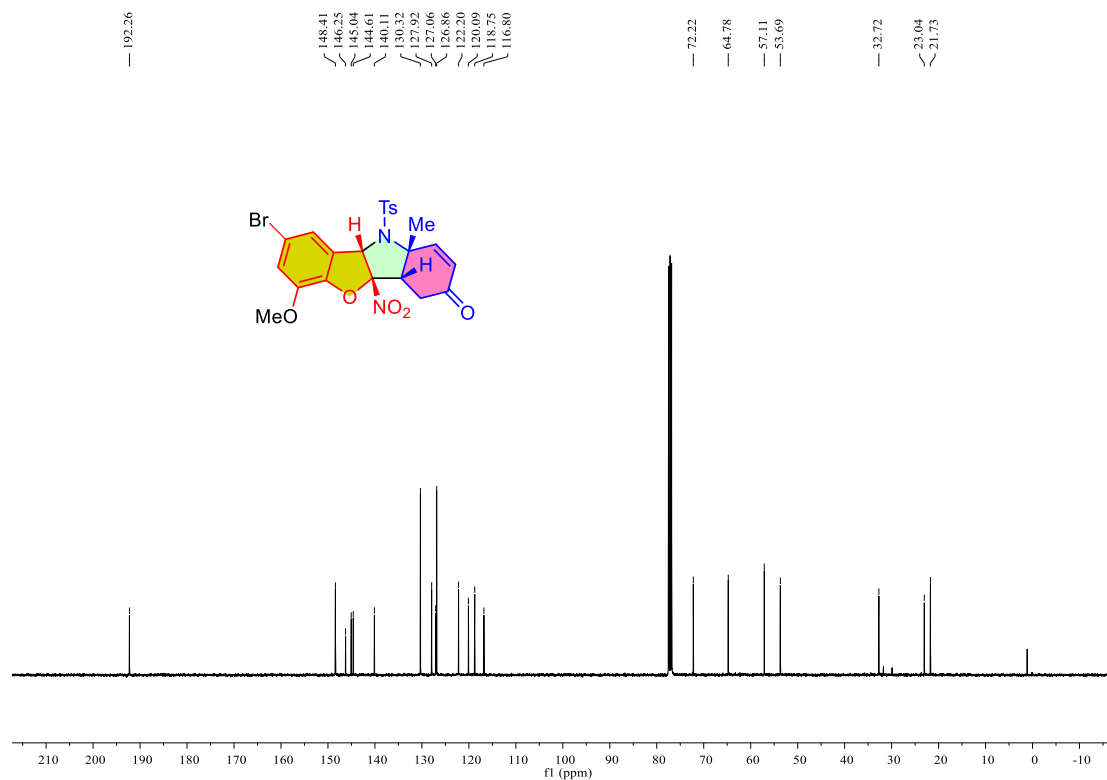

<sup>1</sup>H NMR (400 MHz, DMSO-*d*<sub>6</sub>) of **3ax**

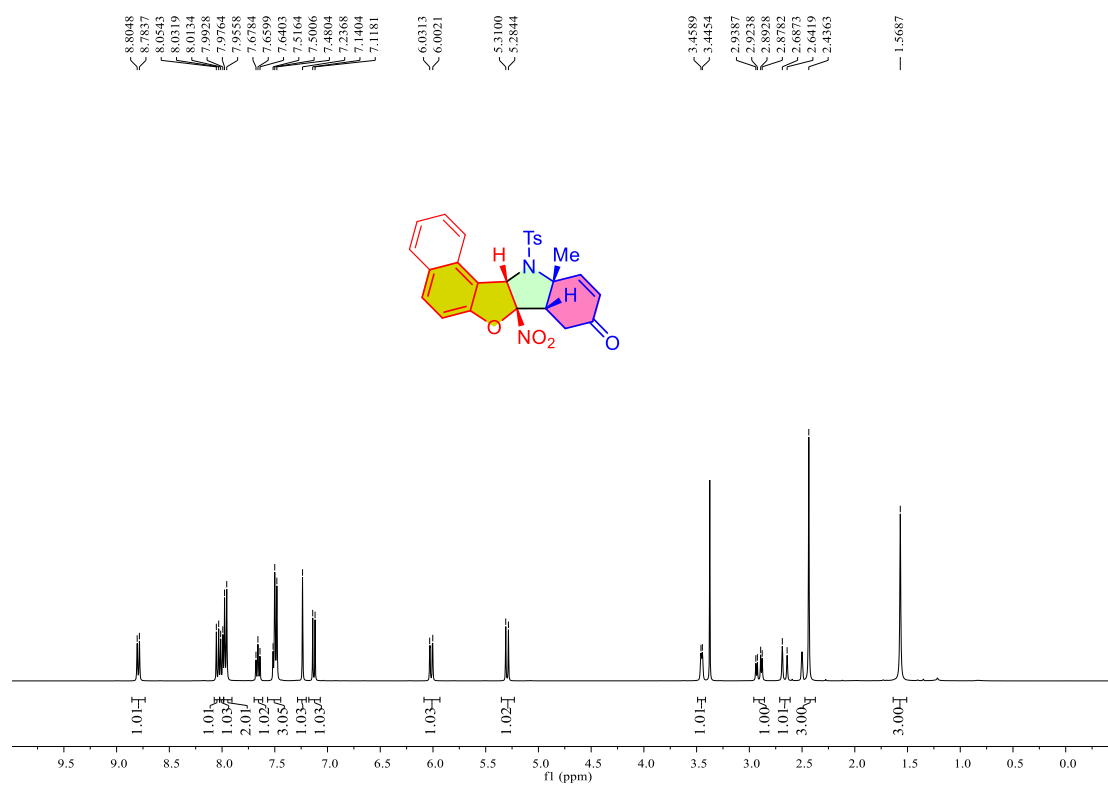

<sup>13</sup>C{<sup>1</sup>H} NMR (101 MHz, DMSO-*d*<sub>6</sub>) of **3ax**

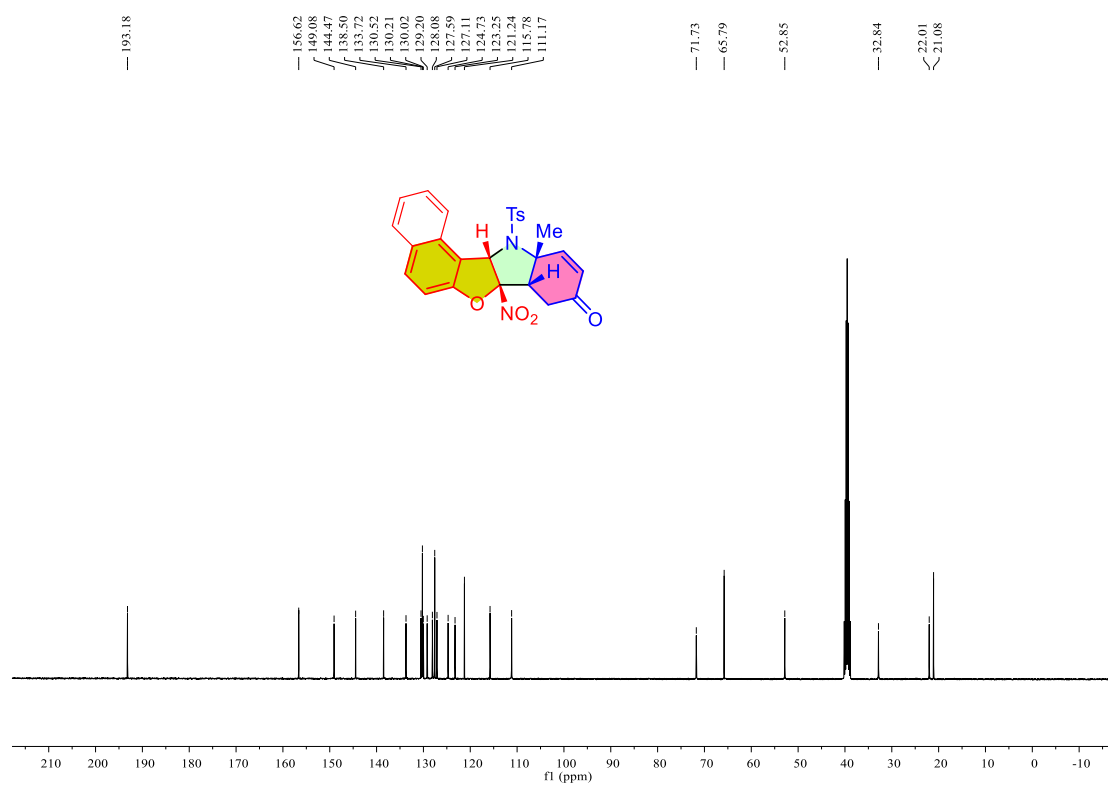

<sup>1</sup>H NMR (400 MHz, CDCl<sub>3</sub>) of **3ay**

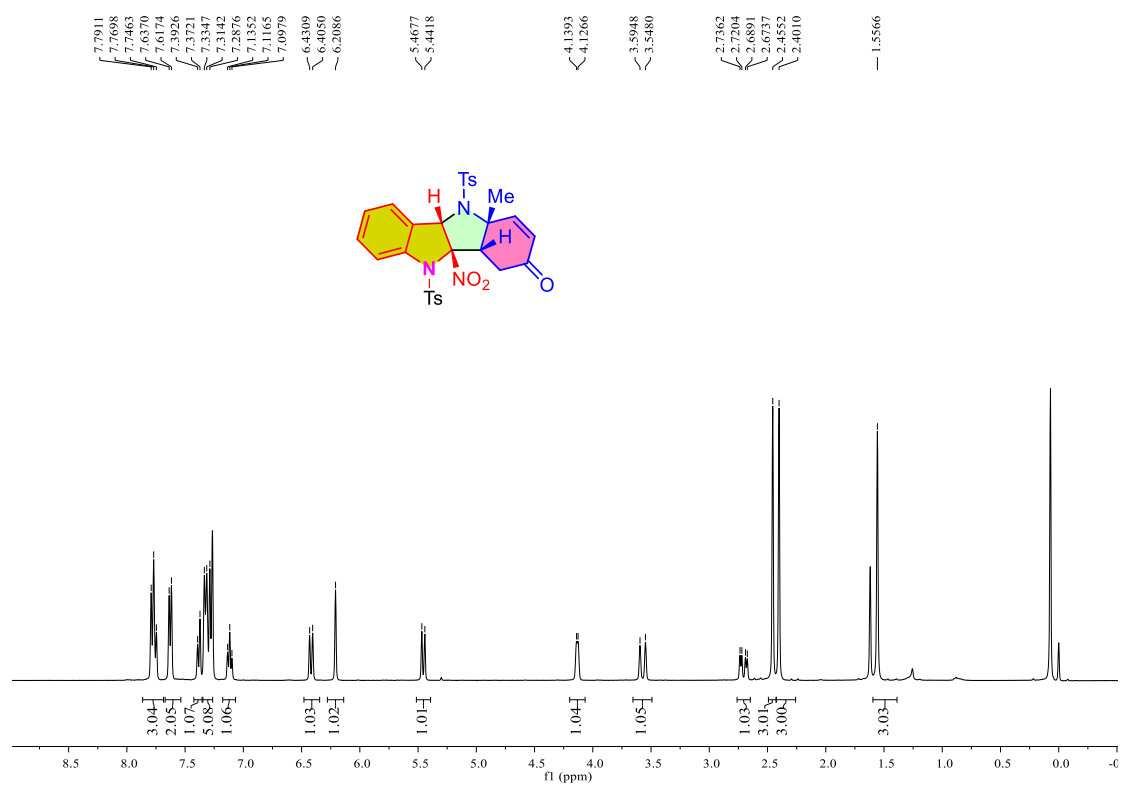

<sup>13</sup>C {<sup>1</sup>H} NMR (101 MHz, CDCl<sub>3</sub>) of **3ay**

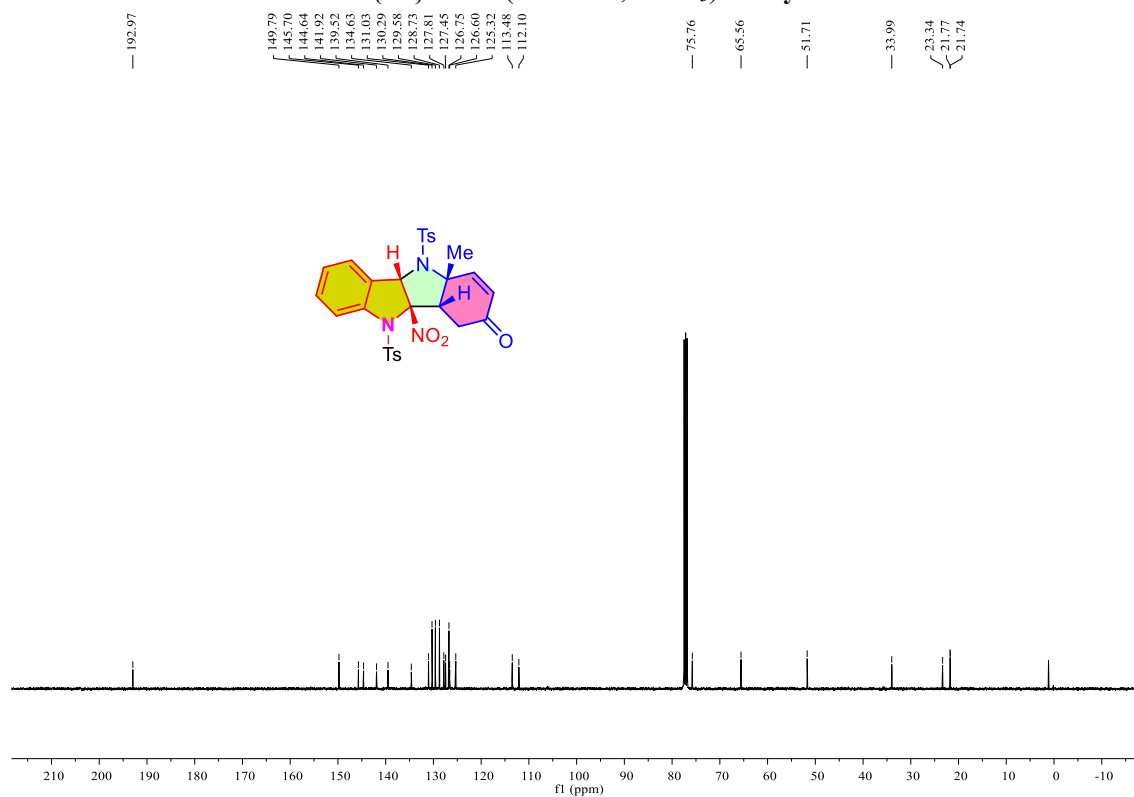

<sup>1</sup>H NMR (400 MHz, CDCl<sub>3</sub>) of **4**

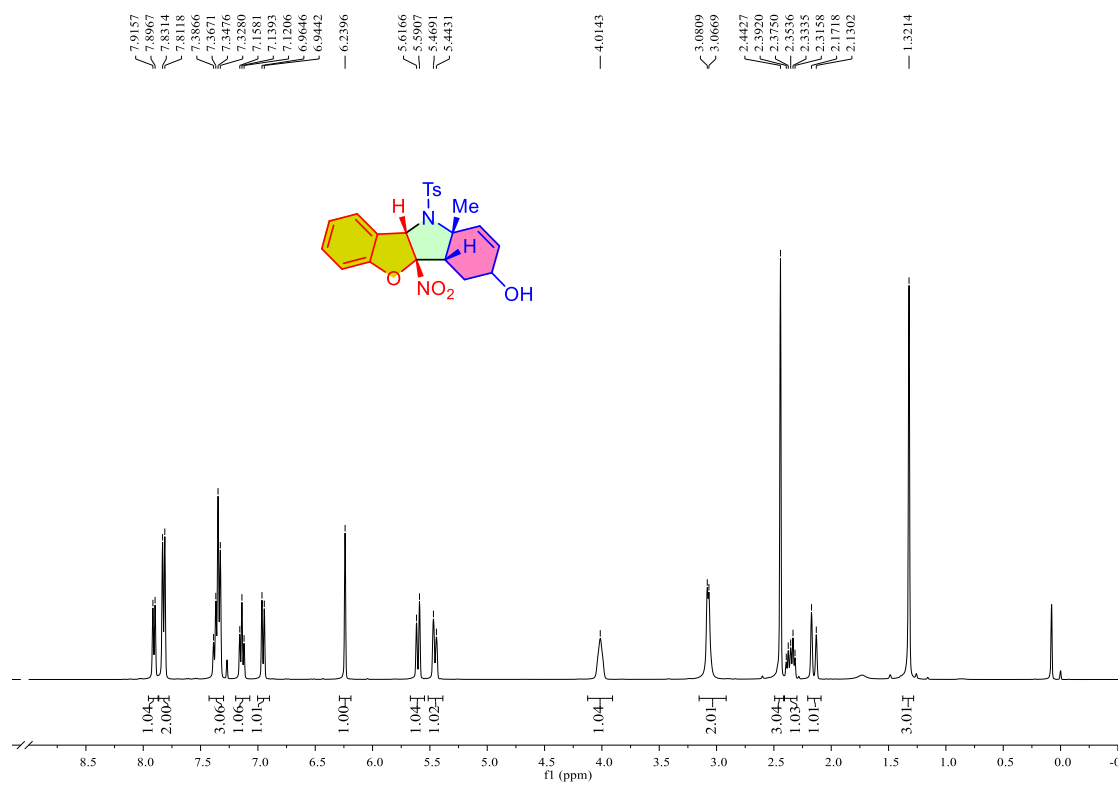

<sup>13</sup>C {<sup>1</sup>H} NMR (101 MHz, CDCl<sub>3</sub>) of **4**

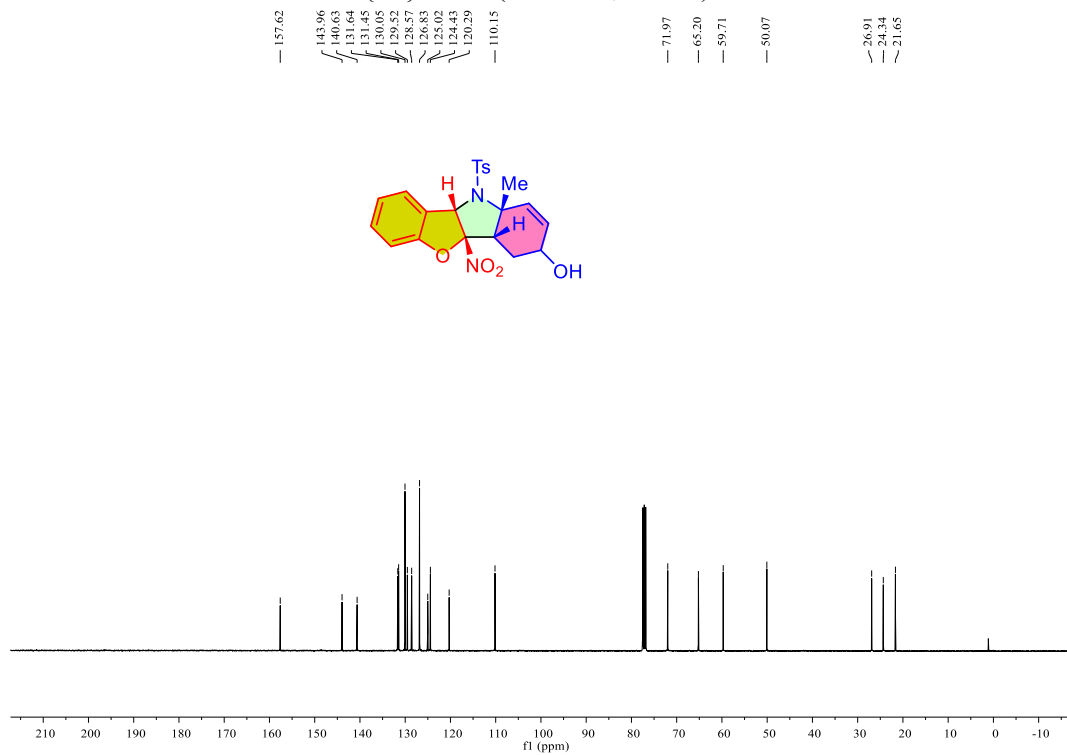

<sup>1</sup>H NMR (400 MHz, CDCl<sub>3</sub>) of **5**

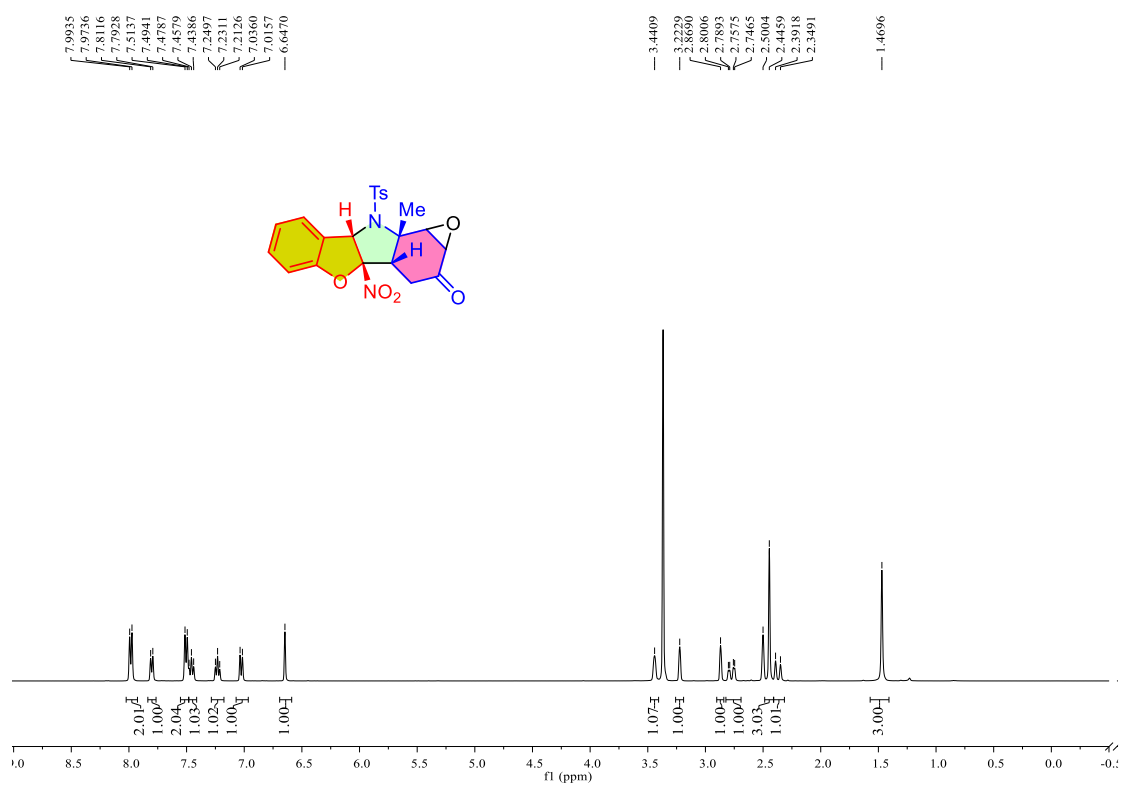

<sup>13</sup>C{<sup>1</sup>H} NMR (101 MHz, CDCl<sub>3</sub>) of **5**

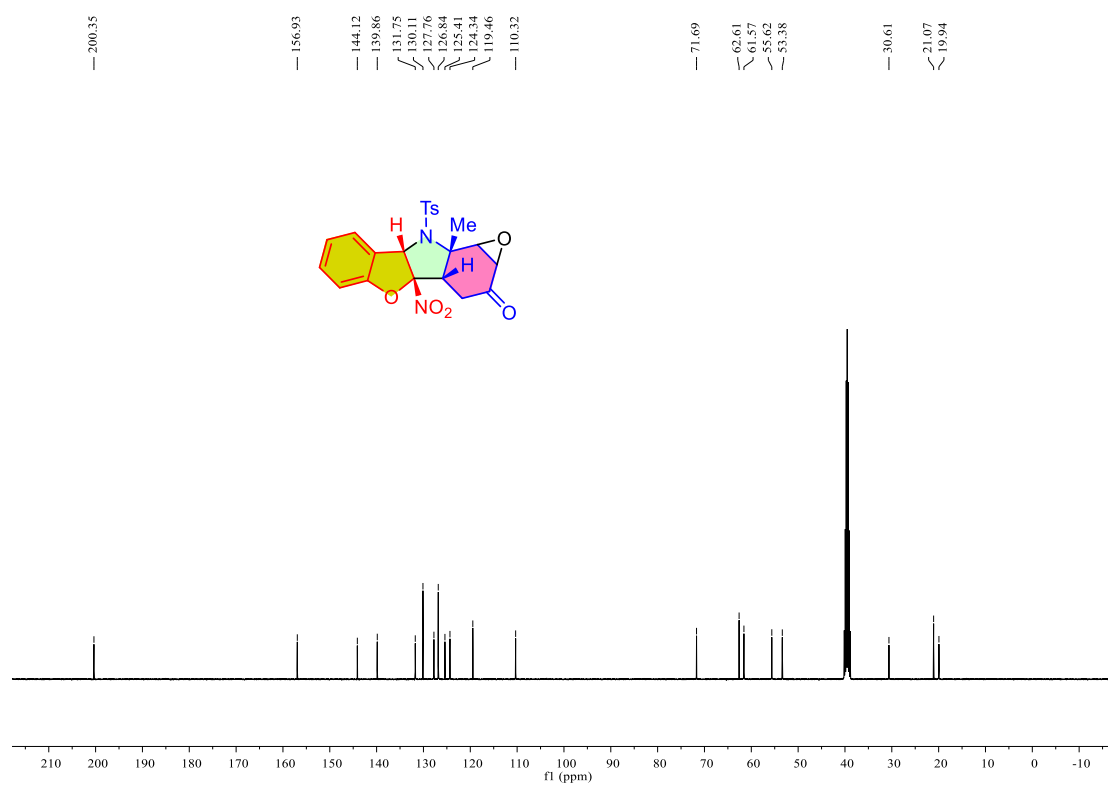

<sup>1</sup>H NMR (400 MHz, CDCl<sub>3</sub>) of **6**

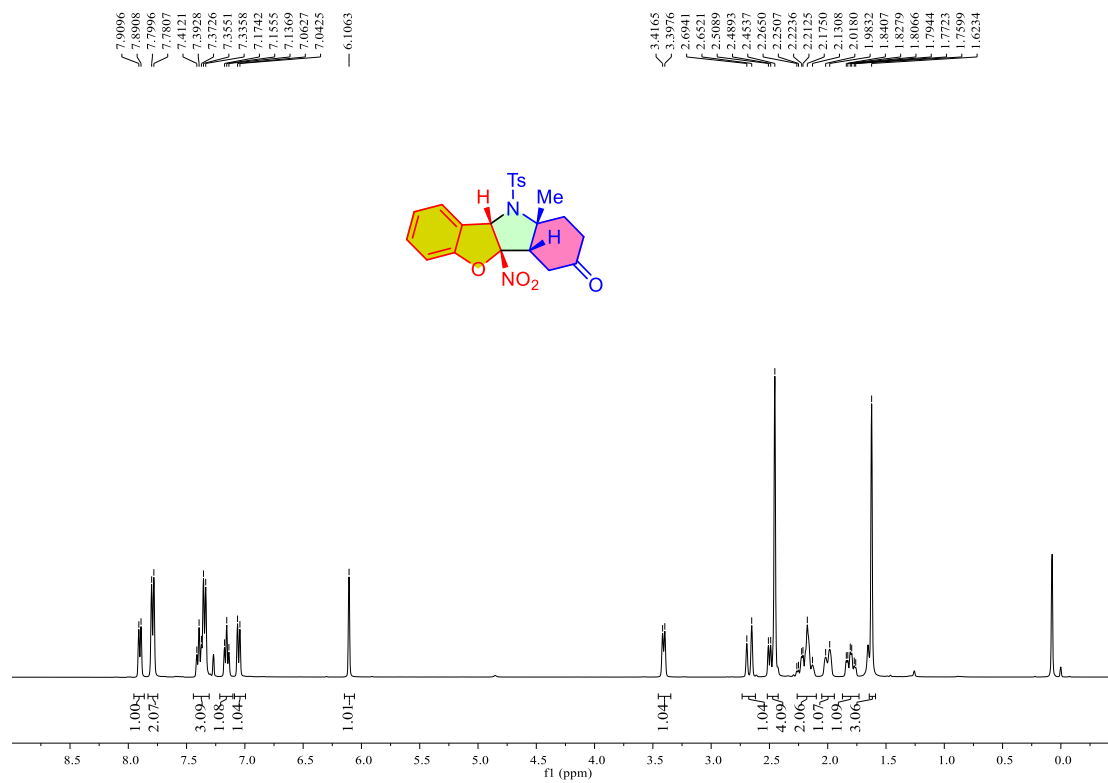

<sup>13</sup>C{<sup>1</sup>H} NMR (101 MHz, CDCl<sub>3</sub>) of **6**

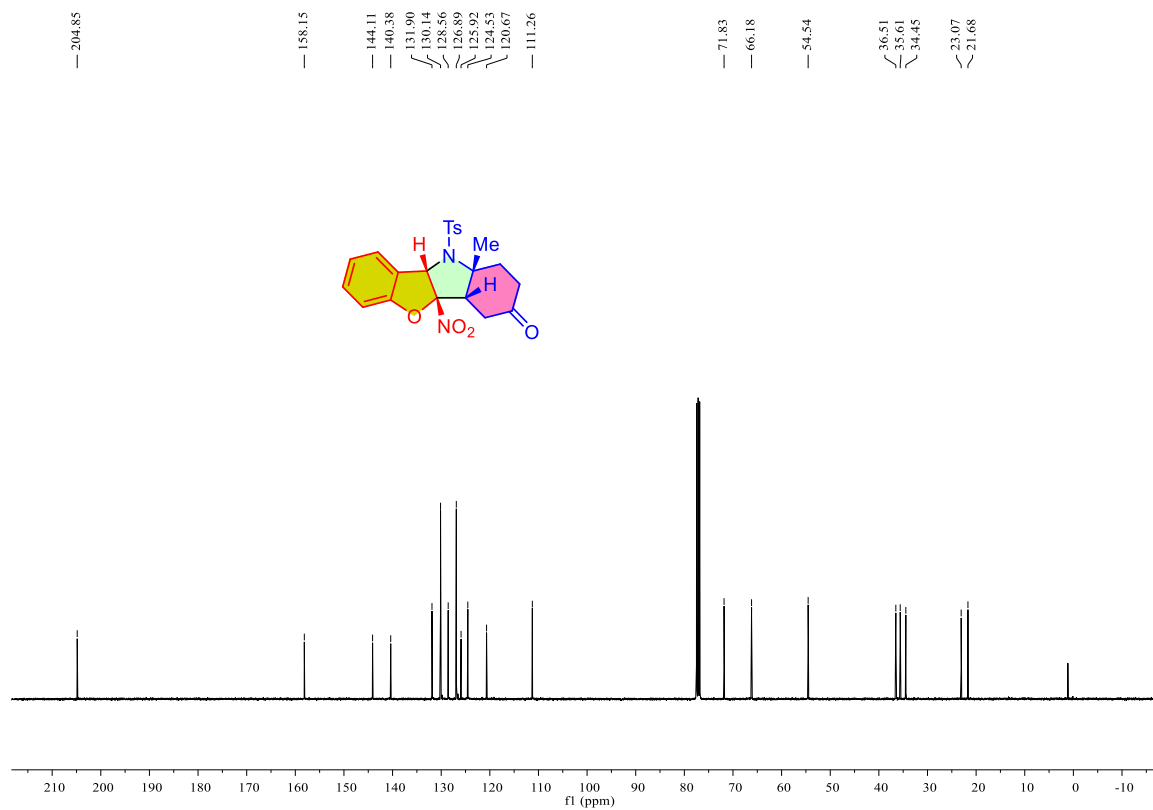

Supplement: s1 [file s1]
